# Supplementary material for: Distinct states of nucleolar stress induced by anticancer drugs
Source: eLife journal article supplement (doi:10.7554/elife.88799), 2023-07-14
Supplement: fig1-data1 [file 1A.xlsx]

## Sheet: NL vs. NP
Total nucleoli cell_1	Total nucleoli cell_2	Total nucleoli cell_3	Total nucleoli cell_4	Total nucleoli cell_5	Total nucleoli cell_6	Total nucleoli cell_7	Total nucleoli cell_8	Total nucleoli cell_9	Total nucleoli cell_10	Total nucleoli cell_11	Total nucleoli cell_12	Total norm. nucleoli cell_1	Total norm. nucleoli cell_2	Total norm. nucleoli cell_3	Total norm. nucleoli cell_4	Total norm. nucleoli cell_5	Total norm. nucleoli cell_6	Total norm. nucleoli cell_7	Total norm. nucleoli cell_8	Total norm. nucleoli cell_9	Total norm. nucleoli cell_10	Total norm. nucleoli cell_11	Total norm. nucleoli cell_12	Average Nucleoli	stdev nucleoli			Total Nucleoplasm	Total Nucleoplasm	Total Nucleoplasm	Total Nucleoplasm	Total Nucleoplasm	Total Nucleoplasm	Total Nucleoplasm	Total Nucleoplasm	Total Nucleoplasm	Total Nucleoplasm	Total Nucleoplasm	Total Nucleoplasm	Total norm. NP cell_1	Total norm. NP cell_2	Total norm. NP cell_3	Total norm. NP cell_4	Total norm. NP cell_5	Total norm. NP cell_6	Total norm. NP cell_7	Total norm. NP cell_8	Total norm. NP cell_9	Total norm. NP cell_10
5375.05	7234.14	5098.58	6170.34	2792.45	3876.29	11342.2	12275.6	4956.07	3321.84	3276.13	6630.06	1	1	1	1	1	1	1	1	1	1	1	1	1	0			4486.75	5170.34	3120.3	5309.69	2589.98	3004.92	7841.59	9010.57	3232.78	1307.96	1927.32	6593.63	1	1	1	1	1	1	1	1	1	1
5509.03	7560.03	5147.03	6475.83	2804.41	3921.49	11686.7	12246.6	4831.68	3266.4	3259.44	6916.64	1.02493	1.04505	1.0095	1.04951	1.00428	1.01166	1.03037	0.997637	0.974901	0.983311	0.994907	1.04322	1.01411	0.0246598			4453.74	5188.27	3093.92	4903.06	2485.82	2973.81	7724.17	9159.37	3377.81	1285.73	1873.57	6605.85	0.992643	1.00347	0.991547	0.923417	0.959785	0.989646	0.985025	1.01651	1.04486	0.983006
5492.11	7536.8	5336.67	6565.07	2774.26	4078.87	11615.9	12670.8	5003.35	3418.92	3530.28	6805.1	1.02178	1.04184	1.0467	1.06397	0.993484	1.05226	1.02413	1.03219	1.00954	1.02923	1.07758	1.0264	1.03492	0.0231863			4632.13	5321.62	3360.92	5229.21	2671.23	3160.51	7650.52	9245.3	3652.22	1408.1	2040.13	6843.21	1.0324	1.02926	1.07711	0.984843	1.03137	1.05178	0.975633	1.02605	1.12974	1.07656
5441.79	7405.77	5208.51	6422.51	2828.45	4000.33	11457.5	12363.7	4872.81	3329.37	3421.97	6733.15	1.01242	1.02372	1.02156	1.04087	1.01289	1.032	1.01016	1.00718	0.983199	1.00227	1.04452	1.01555	1.01719	0.0169493			4618.84	5379.25	3408.55	5240.93	2711.79	3121.57	7722.97	9324.15	3714.4	1397.1	2047.98	6737.82	1.02944	1.0404	1.09238	0.987049	1.04703	1.03882	0.984872	1.0348	1.14898	1.06815
5308.41	7265.35	5016.12	6287.3	2824.28	3871.79	11312.3	12252.1	4710.04	3246.07	3361.19	6588.75	0.987602	1.00431	0.983827	1.01895	1.0114	0.998841	0.997363	0.99809	0.950357	0.977192	1.02596	0.99377	0.995639	0.0200096			4675.87	5414.7	3506.65	5252.42	2748.86	3163.15	7748.16	9411.87	3781.97	1447.29	2043.9	6755.82	1.04215	1.04726	1.12382	0.989214	1.06135	1.05266	0.988086	1.04454	1.16988	1.10653
5166.02	7197.59	4832.26	6297.82	2792.13	3825.35	11144	11999	4670.84	3166.35	3231.73	6459.56	0.961112	0.994947	0.947766	1.02066	0.999885	0.986858	0.982529	0.977468	0.942448	0.953192	0.986447	0.974284	0.9773	0.0230477			4782.46	5437.9	3628.39	5219.5	2816.55	3216.15	7947.62	9488.95	3761.08	1481.47	2103.96	6832.85	1.06591	1.05175	1.16283	0.983014	1.08748	1.07029	1.01352	1.05309	1.16342	1.13266
5047.99	7063.19	4815.52	6149.91	2767.11	3838.28	10949.1	11905.7	4642.51	3150.69	3287.65	6352.08	0.939153	0.976369	0.944483	0.996689	0.990926	0.990196	0.965339	0.969864	0.936732	0.948477	1.00352	0.958074	0.968318	0.0234031			4914.59	5634.94	3736.28	5490.76	2941.57	3302.69	8157.21	9796.84	3886.22	1558.77	2140.54	7010.44	1.09535	1.08986	1.19741	1.0341	1.13575	1.09909	1.04025	1.08726	1.20213	1.19176
4886.88	6802.95	4590.29	5928.6	2699.95	3720.66	10698.9	11492	4280.83	3038.89	3177.87	6274.95	0.909179	0.940395	0.900309	0.960822	0.966875	0.959851	0.943287	0.936169	0.863754	0.914823	0.970009	0.946439	0.934326	0.0317717			5009.82	5718.61	3816.63	5512.73	2907.53	3328	8287.29	9803.03	4095.12	1549.94	2142.13	6972.24	1.11658	1.10604	1.22316	1.03824	1.12261	1.10752	1.05684	1.08795	1.26675	1.18501
4679.34	6582.58	4395.16	5710.51	2600.81	3631.54	10427.5	11342.5	4099.22	2934.13	3076.03	6050.33	0.870568	0.909933	0.862037	0.925476	0.931371	0.936862	0.919358	0.923991	0.82711	0.883286	0.938922	0.91256	0.903456	0.0349935			5074.57	5736.24	3958.87	5578.08	2942.04	3344.17	8337.44	9879.51	4226.91	1615.99	2170.03	6989.45	1.13101	1.10945	1.26875	1.05055	1.13593	1.1129	1.06323	1.09644	1.30751	1.2355
4568.3	6401.52	4289.03	5593	2532.68	3570.26	10200.5	11163.4	4006.41	2870.38	3074.84	5843.78	0.849908	0.884904	0.841221	0.906432	0.906972	0.921053	0.899342	0.909399	0.808384	0.864095	0.938559	0.881407	0.884306	0.0373847			5163.3	5908.51	4041.2	5726.62	3023.37	3385.6	8473.33	10027.8	4294.28	1714.12	2155.49	7099.46	1.15079	1.14277	1.29513	1.07852	1.16733	1.12668	1.08056	1.11289	1.32835	1.31053
4411.05	6215.17	4167.27	5429.3	2472.38	3512.2	9892.46	10899	3865.32	2770.39	2996.54	5659.31	0.820654	0.859144	0.81734	0.879903	0.885379	0.906073	0.872183	0.887858	0.779917	0.833994	0.914658	0.853585	0.859224	0.0399628			5205.11	5998.74	4115.26	5738.7	3031.67	3395.66	8596.94	10137.1	4393.36	1708.64	2105.19	7191.51	1.16011	1.16022	1.31887	1.0808	1.17054	1.13003	1.09633	1.12503	1.359	1.30634
4359.34	6037.68	3826.87	5300.83	2430.91	3412.62	9612.02	10813.4	3719.43	2740.74	2959.81	5547	0.811034	0.834609	0.750577	0.859081	0.870529	0.880383	0.847458	0.880888	0.750479	0.825067	0.903447	0.836645	0.837516	0.0483535			5287.8	6050.04	4385.04	5805.25	3029.12	3397.61	8703.26	10210.5	4468.66	1744.31	2153.89	7190.5	1.17853	1.17014	1.40533	1.09333	1.16955	1.13068	1.10988	1.13317	1.3823	1.33361
4322.67	5954.61	4046.64	5313.62	2422.6	3479.3	9441.75	10656.1	3744.77	2751.52	2998.51	5511.75	0.804211	0.823126	0.793679	0.861154	0.867552	0.897586	0.832445	0.868068	0.755591	0.828313	0.91526	0.831327	0.839859	0.044802			5448.08	6263.92	4352.32	6068.99	3189.41	3540.93	8950.95	10503.2	4629.53	1864.43	2229.69	7410.01	1.21426	1.21151	1.39484	1.143	1.23144	1.17838	1.14147	1.16566	1.43206	1.42545
4208.52	5838.37	3691.88	5199.37	2386.87	3306.77	9271.97	10173.6	3527.41	2574.11	2850.01	5481.85	0.782974	0.807058	0.7241	0.842638	0.854757	0.853078	0.817476	0.828763	0.711735	0.774906	0.869932	0.826818	0.807853	0.0505936			5390.75	6241.85	4459.72	5850.33	3107.38	3491.32	8992.92	10523.8	4600.48	1844.33	2210.09	7394.87	1.20148	1.20724	1.42926	1.10182	1.19977	1.16187	1.14682	1.16794	1.42307	1.41008
4123.16	5681.69	3623.38	5014.47	2310.66	3303.24	8965.94	9999.44	3516.42	2559.91	2849.1	5286.31	0.767094	0.7854	0.710665	0.812672	0.827467	0.852165	0.790495	0.814579	0.709518	0.77063	0.869655	0.797325	0.792305	0.0490027			5453.68	6341.76	4628.8	5998.77	3194.79	3530.52	9078.1	10582.4	4708.32	1878.26	2223.13	7447.93	1.21551	1.22656	1.48345	1.12978	1.23352	1.17491	1.15769	1.17444	1.45643	1.43602
3963.02	5504.55	3491.77	4924.97	2275.5	3190.63	8793.14	9747.52	3388.13	2522.83	2785.37	5171.85	0.737301	0.760913	0.684851	0.798167	0.814874	0.823114	0.775259	0.794057	0.683632	0.759467	0.850201	0.780062	0.771825	0.0510798			5536.96	6443.26	4717.62	6015.47	3156.38	3540.87	9156.2	10735.2	4796.06	1915.95	2264.5	7462.37	1.23407	1.2462	1.51191	1.13292	1.21869	1.17836	1.16764	1.1914	1.48357	1.46484
3934.09	5337.02	3459.6	4850.26	2243.68	3153.19	8510.05	9696.04	3330.7	2421.17	2829.85	5139.73	0.731917	0.737754	0.678542	0.786061	0.803482	0.813457	0.750301	0.789863	0.672045	0.728863	0.863779	0.775217	0.76094	0.0556196			5518.26	6466.81	4640.25	5972.66	3157.39	3537.9	9257.78	10747.1	4728.89	1910.76	2209.85	7350.04	1.2299	1.25075	1.48712	1.12486	1.21908	1.17737	1.1806	1.19272	1.46279	1.46086
3804.08	5364.39	3409.77	4820.33	2284.44	3147.28	8506.54	9615.99	3293.69	2489.3	2795.23	5077.9	0.70773	0.741538	0.668769	0.78121	0.818076	0.811933	0.749991	0.783342	0.664577	0.749375	0.853213	0.76589	0.75797	0.0575667			5657.62	6618.4	4786.67	6129.34	3257.93	3627.39	9441.7	10891.1	4872.3	1973.87	2283.87	7540.61	1.26096	1.28007	1.53404	1.15437	1.2579	1.20715	1.20405	1.2087	1.50715	1.50912
3765.82	5311.66	3380.21	4699.96	2254.93	3109.17	8400.1	9475.5	3252.97	2454.84	2776.69	5046.22	0.700612	0.734249	0.662971	0.761701	0.807511	0.802099	0.740607	0.771898	0.65636	0.739	0.847552	0.761112	0.748806	0.056809			5757.05	6683.31	4846.39	6261.83	3287.08	3652.66	9555.77	11028.1	4941.26	2013.5	2306.68	7595.49	1.28312	1.29262	1.55318	1.17932	1.26915	1.21556	1.2186	1.2239	1.52849	1.53942
3692.82	5270.02	3374.08	4654.86	2243.99	3080	8190.94	9319.59	3307.52	2460.56	2789.44	5092.13	0.687031	0.728493	0.661769	0.754392	0.803591	0.794576	0.722166	0.759196	0.667367	0.740722	0.851445	0.768037	0.744899	0.0565432			5821.28	6801.93	4921.87	6380.5	3295.18	3696.83	9767.24	11203	4958.78	2070.85	2321.08	7689.99	1.29744	1.31557	1.57737	1.20167	1.27228	1.23026	1.24557	1.24332	1.5339	1.58327
3663.62	5077.09	3349.61	4715.11	2224.03	3068.71	8117.51	9034.23	3234.32	2461.07	2734.33	5008.37	0.681597	0.701823	0.65697	0.764157	0.796444	0.791663	0.715692	0.735951	0.652596	0.740875	0.834621	0.755404	0.73565	0.0567385			5904.66	6874.27	4979.3	6440.01	3383.04	3722.43	9786.77	11399.7	5067.16	2089.24	2373.4	7775.47	1.31602	1.32956	1.59578	1.21288	1.3062	1.23878	1.24806	1.26515	1.56743	1.59733
3646.96	5031.24	3367.51	4692.31	2213.24	3084.68	8106.53	9127.08	3234.39	2451.49	2782.31	4996.28	0.678498	0.695486	0.660479	0.760462	0.79258	0.795784	0.714724	0.743514	0.65261	0.737993	0.849267	0.75358	0.736248	0.0592603			6088.89	7032.67	5061.13	6719.18	3480.68	3845.86	9984.91	11694.8	5176.1	2198.99	2449.81	8025.52	1.35708	1.36019	1.622	1.26546	1.3439	1.27985	1.27333	1.2979	1.60113	1.68123
3653.66	5091.67	3332.21	4721.47	2261.65	3079.37	8133.66	9265.73	3254.76	2484.58	2828.4	5034.99	0.679745	0.703839	0.653556	0.765187	0.809916	0.794413	0.717116	0.754809	0.656721	0.747952	0.863336	0.759419	0.742167	0.0633664			6226.18	7119.2	5205.27	6925.44	3585.27	3967.29	10112.1	11978	5262.91	2219.24	2497.06	8148.93	1.38768	1.37693	1.6682	1.3043	1.38429	1.32026	1.28955	1.32932	1.62798	1.69672
3556.65	4914.35	3324.05	4754.59	2203.99	3020.15	7880.45	8977.84	3217.96	2414.49	2777.15	4904.93	0.661696	0.679328	0.651956	0.770555	0.789268	0.779136	0.694791	0.731357	0.649295	0.726855	0.847694	0.739802	0.726811	0.0621482			6218.68	7116.46	5129.39	6784.9	3544.99	3938.85	10197.6	11920.9	5211.96	2253.55	2466.53	8174.88	1.38601	1.3764	1.64388	1.27783	1.36873	1.3108	1.30045	1.32299	1.61222	1.72295
3588.24	4913.49	3277.35	4798.21	2214.56	3034.98	7968.53	8982.87	3169.95	2423.29	2787.45	4938.9	0.667574	0.679209	0.642797	0.777624	0.793053	0.78296	0.702557	0.731767	0.639608	0.729502	0.850838	0.744926	0.728535	0.0652654			6349	7274.2	5235.69	6982.87	3669.69	4061.41	10364	12213.5	5323.72	2287.78	2523.28	8331.85	1.41505	1.40691	1.67795	1.31512	1.41688	1.35159	1.32167	1.35547	1.64679	1.74912
3497.55	4840.47	3236.64	4692.61	2146.09	2928.08	7786.89	8880.96	3121.25	2390.7	2715.51	4767.83	0.650701	0.669115	0.634813	0.760511	0.768532	0.755384	0.686543	0.723465	0.629784	0.719691	0.828877	0.719124	0.712212	0.0605238			6259.04	7159.24	5199.88	6763.7	3611.31	3965.67	10328.5	11988	5289.46	2264.56	2489.25	8221.1	1.39501	1.38467	1.66647	1.27384	1.39434	1.31972	1.31714	1.33044	1.63619	1.73137
3419.65	4720.25	3113.76	4455.62	2081.75	2776.17	7620.27	8735.63	3007.16	2294.47	2642.79	4699.86	0.636209	0.652497	0.61071	0.722102	0.745491	0.716193	0.671852	0.711626	0.606762	0.690721	0.806681	0.708872	0.689976	0.0580591			6146.21	7062.67	5175.58	6731.45	3516.32	3911.06	10257.9	11878.7	5260.15	2206.29	2460.2	8065.01	1.36986	1.366	1.65868	1.26777	1.35766	1.30155	1.30813	1.31831	1.62713	1.68682
3403.48	4657.41	3115.36	4536.95	2083.12	2791.64	7570.47	8721.46	3017.97	2280.24	2688.29	4582.94	0.6332	0.64381	0.611025	0.735282	0.745983	0.720184	0.667461	0.710472	0.608943	0.686439	0.820571	0.691237	0.689551	0.0619753			6192.4	7112.65	5191.62	6744.44	3530.21	3944.86	10244.9	11932	5262.21	2251.01	2481.21	8132.7	1.38015	1.37566	1.66382	1.27021	1.36303	1.3128	1.30648	1.32423	1.62777	1.72101
3348.17	4588.15	3026.86	4539.86	2023.05	2725.56	7483.1	8557.81	2928.06	2236.63	2641.04	4577.38	0.62291	0.634236	0.593668	0.735755	0.724472	0.703136	0.659758	0.69714	0.590803	0.67331	0.806146	0.690398	0.677644	0.0625861			6168.07	7138.8	5199.02	6652.8	3501.09	3918.71	10265.2	11929.7	5273.53	2226.29	2447.45	8128.81	1.37473	1.38072	1.66619	1.25295	1.35178	1.3041	1.30907	1.32397	1.63127	1.7021
3350.88	4577.32	3112.14	4504.84	2041.02	2728.36	7427.84	8482.27	2998.87	2213.91	2649.63	4589.15	0.623415	0.632739	0.610393	0.73008	0.730905	0.703859	0.654886	0.690986	0.60509	0.666471	0.808768	0.692174	0.679147	0.0597083			6128.89	7157.37	5129.53	6553.44	3507.18	3902.43	10269.3	11980.9	5213.04	2235.46	2475.84	8160.29	1.366	1.38431	1.64392	1.23424	1.35413	1.29868	1.30959	1.32965	1.61256	1.70912
3389.02	4655.73	3176.7	4683.07	2096.52	2806.23	7588.4	8613.95	3097.42	2317.36	2743.53	4682	0.63051	0.643577	0.623056	0.758964	0.750782	0.723947	0.669042	0.701714	0.624974	0.697614	0.837432	0.706178	0.697316	0.0646648			6401.96	7386.02	5380.46	6962.02	3740	4108.23	10515.9	12461.2	5441.09	2367.56	2539.76	8544.9	1.42686	1.42854	1.72434	1.31119	1.44403	1.36717	1.34104	1.38295	1.6831	1.81011
3463.86	4721.41	3173.38	4722.98	2160.06	2874.55	7623.45	8691.28	3053.65	2364.41	2785.49	4827.73	0.644434	0.652657	0.622405	0.765432	0.773537	0.741574	0.672133	0.708013	0.616143	0.711779	0.85024	0.728158	0.707209	0.0697529			6511.04	7510.92	5426.63	7127.88	3789.18	4159.69	10568	12807.3	5527.43	2402.93	2560.72	8635.05	1.45117	1.45269	1.73914	1.34243	1.46302	1.38429	1.34768	1.42137	1.70981	1.83716
3728.91	5030.01	2789.51	4884.35	2373.55	2944.57	8201.45	8932.8	2720.45	2308.34	2671.81	5082.58	0.693745	0.695316	0.547115	0.791585	0.849986	0.759636	0.723092	0.727688	0.548912	0.694897	0.815538	0.766597	0.717842	0.0934161			6687.98	7755.98	5374.98	7188.8	3846.72	4198.3	11084.6	13180	5429.7	2333.56	2451.1	8785.46	1.49061	1.50009	1.72259	1.3539	1.48523	1.39714	1.41357	1.46272	1.67957	1.78412
3718.59	5073.03	2794.68	4809.67	2411.58	2890.5	8213.81	9023.98	2736.68	2317.65	2713.35	4973.29	0.691825	0.701262	0.548129	0.779481	0.863608	0.745687	0.724182	0.735116	0.552188	0.697701	0.828218	0.750113	0.718126	0.0938982			6815.31	7796.11	5432.43	7251.78	3851.7	4249.65	11143.7	13213.8	5469.82	2391.47	2477.86	8918.96	1.51898	1.50785	1.741	1.36576	1.48715	1.41423	1.4211	1.46648	1.69198	1.8284
3657.89	4972.93	2896.02	4714.23	2351.79	2864.73	8091.93	8860.36	2803.59	2323.81	2682	4947.52	0.680532	0.687425	0.568005	0.764015	0.842196	0.73904	0.713436	0.721787	0.565688	0.699556	0.818649	0.746226	0.712213	0.0836232			6719.95	7654.68	5364.21	7336.37	3902.06	4293.98	11012.4	13214.6	5440.7	2421.35	2470.63	8859.02	1.49773	1.4805	1.71913	1.38169	1.5066	1.42898	1.40436	1.46657	1.68298	1.85124
3564.13	4891.61	2930.42	4687.35	2335.92	2870.63	7879.18	8963.03	2852.01	2342.78	2764.22	4850.1	0.663088	0.676184	0.574752	0.759658	0.836511	0.740563	0.694679	0.730151	0.575457	0.705267	0.843746	0.731533	0.710966	0.0842866			6702.66	7589.86	5413.28	7372.16	3872.75	4273.15	10987.2	13202.1	5469.55	2419.59	2505.11	8914.87	1.49388	1.46796	1.73486	1.38843	1.49528	1.42205	1.40115	1.46518	1.6919	1.84989
3649.44	4942.89	2880.19	4723.15	2396.35	2879.56	8006.19	8942.82	2798.34	2388.46	2749.46	4953.76	0.678959	0.683273	0.564901	0.765459	0.858151	0.742866	0.705877	0.728504	0.564629	0.719019	0.839242	0.747167	0.716504	0.089436			6757.41	7702.43	5424.24	7412.4	4009.29	4326.68	11103.5	13314.2	5487.58	2405.24	2515.45	8949.35	1.50608	1.48973	1.73837	1.39601	1.548	1.43986	1.41597	1.47762	1.69748	1.83893
3638.04	4858.96	2853.25	4695.98	2381.05	2821.83	7999	8890.25	2761.73	2391.42	2756.37	4893.93	0.67684	0.67167	0.559617	0.761057	0.852675	0.727972	0.705243	0.724222	0.557242	0.719909	0.841349	0.738142	0.711328	0.0905294			6757.27	7652.35	5438.94	7406.92	3949.66	4306.68	11111.2	13226.4	5512.31	2422.6	2474.46	8978.32	1.50605	1.48005	1.74308	1.39498	1.52498	1.43321	1.41695	1.46787	1.70513	1.85219
3542.28	4725.97	3034.19	4551.22	2294.87	2799.63	7749.46	8863.92	2941.16	2334.47	2772.96	4789.5	0.659023	0.653286	0.595105	0.737595	0.821811	0.722245	0.683242	0.722077	0.593446	0.702766	0.846415	0.722392	0.70495	0.0770978			6732.25	7649.96	5555.79	7452.91	3964.24	4356.98	10946.2	13159.8	5629.58	2485.71	2523.15	8965.18	1.50047	1.47958	1.78053	1.40364	1.53061	1.44995	1.39592	1.46048	1.7414	1.90044
3398.21	4555.18	3051.14	4454.9	2163.49	2694.19	7436.56	8567.67	2973.52	2315.11	2648.48	4675.59	0.63222	0.629677	0.598429	0.721985	0.774764	0.695044	0.655655	0.697943	0.599974	0.696936	0.808417	0.705212	0.684688	0.0653013			6545.44	7418.06	5475.12	7223.28	3945.49	4270.45	10648.3	12854.8	5536.33	2417.24	2547.89	8741.08	1.45884	1.43473	1.75468	1.36039	1.52337	1.42115	1.35792	1.42664	1.71256	1.8481
3287.94	4456.49	2963.73	4375.26	2087.69	2613.01	7283	8247.42	2878.79	2213.91	2568.51	4602.04	0.611704	0.616035	0.581286	0.709078	0.747618	0.6741	0.642116	0.671855	0.58086	0.666472	0.784008	0.694118	0.664938	0.063073			6411.15	7226.71	5424.01	7003.55	3844.14	4190.89	10514.4	12481.7	5487.34	2393.91	2501.53	8593.11	1.42891	1.39772	1.7383	1.31901	1.48424	1.39467	1.34085	1.38523	1.69741	1.83026
3237.75	4402.97	2917.02	4271.96	2025.71	2477.2	7252.57	8251.07	2766.16	2154.11	2535.35	4551.99	0.602367	0.608638	0.572124	0.692338	0.725424	0.639065	0.639433	0.672153	0.558135	0.648469	0.773888	0.686569	0.65155	0.0627736			6205.23	6986.6	5357.98	6736.41	3720.38	4101.17	10316.6	12184.3	5484.87	2321.45	2461.59	8414.84	1.38301	1.35128	1.71714	1.2687	1.43645	1.36482	1.31562	1.35222	1.69664	1.77486
3263.34	4496.82	2976.86	4316.12	2067.31	2528.55	7247.72	8240.91	2861.53	2161.44	2565.16	4618.64	0.607128	0.621611	0.58386	0.699495	0.740322	0.652312	0.639005	0.671325	0.577378	0.650677	0.782984	0.696621	0.660226	0.0618541			6301.87	7127.98	5396.93	6828.68	3815.1	4149.55	10509.6	12261.1	5487.98	2356.04	2541.08	8557.77	1.40455	1.37863	1.72962	1.28608	1.47302	1.38092	1.34024	1.36074	1.6976	1.80131
3186.16	4343.86	2772.12	4204.78	2023.04	2397.07	7102.16	8101.25	2625.32	2104.22	2470.87	4481.73	0.592768	0.600467	0.543705	0.68145	0.724469	0.618393	0.626172	0.659948	0.529718	0.63345	0.754203	0.675971	0.636726	0.0670061			6022.14	6936.75	5254.33	6587.85	3610.84	4006.11	10257.1	11894.5	5369.98	2271.02	2403.97	8226.24	1.3422	1.34164	1.68392	1.24072	1.39416	1.33318	1.30804	1.32006	1.6611	1.73631
3157.95	4382.63	2745.16	4218.59	2013.73	2441.45	7009.67	8109.07	2646.6	2133.89	2445.52	4437.43	0.587521	0.605825	0.538416	0.683688	0.721133	0.629841	0.618018	0.660584	0.534012	0.642381	0.746467	0.66929	0.636431	0.0653814			6085.13	6858.79	5309.88	6665.59	3642.57	3988.47	10263.7	11917.8	5383.69	2230.96	2472.49	8248.97	1.35624	1.32656	1.70172	1.25536	1.40641	1.32731	1.30889	1.32265	1.66534	1.70568
3161.35	4412.95	2709.01	4186.81	1997.13	2413.95	6995.52	8006.81	2612.23	2065.32	2442.07	4494.16	0.588153	0.610017	0.531326	0.678538	0.71519	0.622749	0.61677	0.652255	0.527077	0.62174	0.745413	0.677847	0.632256	0.0663551			6023.47	6848.5	5227.06	6551.57	3656.42	3981.97	10307.1	11877.7	5296.5	2253.05	2442.23	8118.02	1.3425	1.32457	1.67518	1.23389	1.41175	1.32515	1.31442	1.31819	1.63837	1.72256
3200.9	4480.33	2875.78	4240.95	2052.81	2458.46	7071.18	8234.7	2744.28	2178.28	2515.76	4519.22	0.595512	0.619332	0.564036	0.687312	0.735128	0.634232	0.623441	0.670819	0.553721	0.655744	0.767907	0.681627	0.649067	0.0643287			6133.01	6875.61	5335.56	6715.79	3748.25	4055.18	10289.3	12045.7	5447.71	2279.01	2477.76	8306.4	1.36691	1.32982	1.70995	1.26482	1.44721	1.34951	1.31215	1.33684	1.68515	1.74241
3141.58	4361.83	2727.13	4125.57	2011.92	2412.1	7028.37	8106.35	2631.97	2078.52	2436.07	4389.11	0.584475	0.602951	0.53488	0.668612	0.720487	0.622271	0.619666	0.660363	0.531059	0.625714	0.743583	0.662002	0.631339	0.064899			5956.23	6757.06	5193.83	6628.15	3569.04	3906.5	10184.4	11723.8	5265.08	2191.34	2421.07	8039.69	1.32751	1.30689	1.66453	1.24831	1.37802	1.30003	1.29877	1.30111	1.62865	1.67538
3191.19	4434.6	2770.62	4206.39	2039.33	2417.85	7076.34	8170.37	2631.7	2120.62	2464.47	4383.36	0.593704	0.61301	0.54341	0.681711	0.730299	0.623753	0.623896	0.665579	0.531004	0.638387	0.75225	0.661135	0.638178	0.0661695			5938.34	6775.55	5166.42	6573.13	3572.27	3908.08	10200.2	11786	5273.81	2209.67	2395.59	8102.72	1.32353	1.31046	1.65575	1.23795	1.37927	1.30056	1.30078	1.30801	1.63135	1.6894
3191.78	4486.81	2745.27	4200.5	2011.03	2443.9	7083.47	8217.8	2662.78	2121.35	2478.55	4394.56	0.593815	0.620227	0.538439	0.680757	0.720165	0.630474	0.624524	0.669442	0.537276	0.638607	0.756549	0.662824	0.639425	0.0652117			5918.16	6740.15	5224.14	6514.82	3607.43	3938.17	10241.6	11756.8	5280.13	2229.56	2394.29	8108.09	1.31903	1.30362	1.67425	1.22697	1.39284	1.31057	1.30606	1.30478	1.63331	1.70461
3235.44	4474.03	2779.53	4233.99	2009.91	2447.74	7164.96	8336.8	2657.49	2106	2510.68	4349.85	0.601937	0.61846	0.545158	0.686183	0.719765	0.631464	0.631709	0.679136	0.53621	0.633985	0.766355	0.656081	0.642204	0.0660927			5954.98	6798.4	5234.92	6573.89	3651.48	3937.27	10223.7	11813.8	5327.91	2261.2	2431	8114.43	1.32724	1.31488	1.6777	1.23809	1.40985	1.31027	1.30378	1.31111	1.64809	1.7288
3218.25	4466.77	2811.43	4146.59	2046.1	2448.68	7131.41	8304.04	2699.13	2123.67	2549.9	4272.39	0.598739	0.617457	0.551414	0.67202	0.732727	0.631707	0.628751	0.676468	0.544611	0.639307	0.778327	0.644397	0.642994	0.0669821			5944.13	6713.33	5282	6699.38	3668.82	3968.59	10176.7	11835.4	5365.39	2305.34	2476.01	8171.91	1.32482	1.29843	1.69279	1.26173	1.41654	1.3207	1.29779	1.3135	1.65968	1.76254
3226	4491.54	2694.01	4163.37	2013.7	2432.33	7151.04	8290.36	2573.98	2109.33	2480.71	4302.19	0.600182	0.620881	0.528385	0.674739	0.721124	0.627491	0.630482	0.675353	0.519358	0.63499	0.757207	0.648892	0.63659	0.0687223			5832.16	6715.82	5086.45	6498.22	3524.89	3848.42	10193.6	11682.7	5182.96	2172.49	2346.47	7960.39	1.29986	1.29891	1.63012	1.22384	1.36097	1.2807	1.29994	1.29655	1.60325	1.66097
3177.66	4455.88	2759.72	4133.65	2011.18	2456.11	7094.73	8218.65	2658.57	2075.4	2426.16	4189.21	0.591187	0.615952	0.541273	0.669923	0.720222	0.633624	0.625517	0.669512	0.536426	0.624775	0.740557	0.631851	0.633401	0.0616258			5811.76	6616.26	5056.53	6443.78	3480.51	3845.75	10031.9	11643	5123.05	2211.41	2420.55	7946.08	1.29532	1.27966	1.62053	1.21359	1.34384	1.27982	1.27931	1.29215	1.58472	1.69073
3166.43	4442.36	2782.89	4159.88	2005.18	2479.32	7077.7	8265.14	2666.79	2098.59	2508.8	4189.24	0.589098	0.614083	0.545817	0.674173	0.718073	0.639611	0.624016	0.673299	0.538084	0.631755	0.765782	0.631856	0.637137	0.0653693			5901.02	6661.2	5107.48	6546.69	3578.29	3896.05	10083.9	11703.1	5189.16	2251.87	2448.36	8020.14	1.31521	1.28835	1.63686	1.23297	1.38159	1.29656	1.28596	1.29882	1.60517	1.72167
3188.88	4507.13	2853.63	4217.12	2098.69	2535.07	7233.44	8442.25	2739.8	2123.46	2559.16	4337.22	0.593276	0.623036	0.559691	0.683449	0.751558	0.653994	0.637747	0.687726	0.552817	0.639242	0.781153	0.654175	0.651489	0.0686724			5964.99	6679.1	5133.57	6608.09	3614.91	3962.86	10240.3	11815.8	5217.97	2245.08	2411.61	8138.07	1.32947	1.29181	1.64522	1.24453	1.39573	1.31879	1.3059	1.31132	1.61408	1.71648
3219.36	4431.71	2746.21	4127.64	2063.04	2466.19	7104.92	8264.13	2632.51	2102.06	2440.98	4258.79	0.598946	0.61261	0.538622	0.668949	0.738791	0.636224	0.626416	0.673217	0.531168	0.632801	0.74508	0.642346	0.637097	0.065682			5845.83	6600.53	5075.51	6462.22	3553.14	3908.61	10072.8	11657.2	5162.2	2213.86	2445.13	8050.07	1.30291	1.27661	1.62661	1.21706	1.37188	1.30073	1.28453	1.29372	1.59683	1.6926
3167.39	4408.47	2721.11	4147.41	2026.75	2432.34	7088.73	8259.49	2619.62	2086.61	2419.28	4177.31	0.589277	0.609397	0.533699	0.672151	0.725797	0.627492	0.624988	0.672838	0.528567	0.628149	0.738459	0.630057	0.631739	0.0648047			5778.22	6521.2	4991.23	6336.6	3481.47	3827.38	9947	11551.3	5070.66	2159.93	2375.31	8000.15	1.28784	1.26127	1.5996	1.1934	1.34421	1.2737	1.26849	1.28198	1.56851	1.65137
3203.19	4378.15	2771.82	4104.27	2010.9	2468.33	7034.52	8388.69	2653.46	2085	2445.48	4146.79	0.595938	0.605207	0.543646	0.665161	0.72012	0.636776	0.620208	0.683364	0.535395	0.627665	0.746454	0.625453	0.633782	0.0632063			5793.53	6517.68	5119.97	6453.65	3584.51	3908.64	9987.67	11642.1	5220.14	2222.96	2434.66	8051.75	1.29125	1.26059	1.64086	1.21545	1.38399	1.30075	1.27368	1.29205	1.61475	1.69956
3176.58	4396.12	2759.12	4188.2	2060.33	2516.5	7052.78	8433.95	2647.19	2084.06	2455.69	4168.03	0.590987	0.60769	0.541154	0.678762	0.737821	0.649203	0.621818	0.687051	0.53413	0.62738	0.74957	0.628657	0.637852	0.0676649			5829.83	6469.12	5098.56	6362.25	3551.8	3879.82	9962.75	11674.4	5186.13	2212.03	2435.18	8057.88	1.29934	1.2512	1.634	1.19823	1.37136	1.29115	1.2705	1.29564	1.60423	1.6912
3205.6	4449.92	2775.23	4201.78	2069.56	2521.31	7161.64	8287.69	2681.89	2057.86	2430.28	4300.8	0.596386	0.615128	0.544315	0.680964	0.741126	0.650444	0.631416	0.675135	0.541131	0.619495	0.741814	0.648682	0.640503	0.064408			5886.78	6469.03	5110.08	6422.33	3586.4	3915.86	10068.4	11703.4	5177.93	2277.1	2482.25	8139.39	1.31204	1.25118	1.63769	1.20955	1.38472	1.30315	1.28397	1.29885	1.60169	1.74095
3185.88	4448.41	2803.77	4181.07	2110.04	2586.2	7209.57	8525.63	2716.6	2113.83	2491.82	4251.04	0.592717	0.614918	0.549913	0.677607	0.755622	0.667186	0.635642	0.694519	0.548136	0.636344	0.760599	0.641178	0.647865	0.0685891			5912.48	6498.78	5212.24	6487.92	3636.37	3932.92	10043.4	11780.4	5269.04	2294.13	2521.43	8149.06	1.31776	1.25693	1.67043	1.2219	1.40401	1.30883	1.28078	1.3074	1.62988	1.75398
3197.54	4462.87	2945.65	4330.39	2150.55	2608.59	7236.87	8428.97	2831.45	2147.12	2489.85	4292.78	0.594887	0.616918	0.57774	0.701807	0.770129	0.672962	0.638049	0.686644	0.571308	0.646364	0.759998	0.647473	0.657023	0.0648081			6134.32	6678.83	5339.61	6596.86	3786.4	4044.89	10198.2	12106.8	5425.61	2402.54	2605.79	8373.96	1.36721	1.29176	1.71125	1.24242	1.46194	1.34609	1.30052	1.34362	1.67831	1.83686
3313.6	4725.85	3023.24	4424.21	2217.65	2742.12	7424.95	8882.77	2920.03	2292.09	2632.74	4339.64	0.616479	0.653271	0.592957	0.717012	0.794159	0.70741	0.654632	0.723613	0.589181	0.690006	0.803615	0.65454	0.683073	0.0701872			6365.7	6857.42	5494.62	6895.32	3987.43	4200.28	10398.2	12479.3	5577.24	2509.54	2602.78	8726.48	1.41878	1.3263	1.76093	1.29863	1.53956	1.3978	1.32603	1.38496	1.72521	1.91867
3329.31	4684.08	3081.23	4332.94	2221.45	2745.08	7451.55	8911.96	2975.52	2286.36	2631.06	4295.27	0.619402	0.647496	0.604332	0.702221	0.795518	0.708173	0.656976	0.72599	0.600378	0.68828	0.803101	0.647849	0.68331	0.0675517			6332.31	6842.34	5462.82	6881.9	3960.97	4162.61	10365.4	12428.7	5541.2	2483.91	2614.34	8625.49	1.41133	1.32338	1.75074	1.2961	1.52934	1.38526	1.32184	1.37935	1.71406	1.89907
3372.37	4864.48	2978.66	4370.12	2287.06	2841.41	7616	9043.56	2912.76	2340.32	2660.8	4342.09	0.627413	0.672433	0.584213	0.708245	0.819015	0.733024	0.671476	0.73671	0.587716	0.704526	0.812179	0.654909	0.692655	0.0759891			6423.54	6969.96	5505.74	7022.47	4006.82	4162.81	10466.8	12596.5	5555.93	2524.07	2575.89	8680.42	1.43167	1.34807	1.76449	1.32257	1.54705	1.38533	1.33478	1.39797	1.71862	1.92978
3450.55	5031.83	2909.43	4478.97	2394.26	2930.85	7982.76	9125.69	2828.99	2371.57	2623.44	4519.79	0.641958	0.695567	0.570636	0.725887	0.857403	0.756098	0.703812	0.743401	0.570813	0.713933	0.800774	0.681712	0.705166	0.0840279			6519.19	7083.88	5510.39	7193.05	4009.68	4153.8	10637.1	12666.3	5571.69	2517.75	2477.18	8802.69	1.45299	1.3701	1.76598	1.3547	1.54815	1.38233	1.35649	1.40571	1.7235	1.92494
3604.66	5248.37	2825.97	4635.75	2501.3	3004.12	8331.42	9127	2754.92	2381.75	2593.47	4791	0.670629	0.7255	0.554267	0.751295	0.895738	0.774998	0.734551	0.743508	0.555868	0.716997	0.791625	0.722618	0.7198	0.0942301			6610.22	7210.98	5453.69	7204.7	4025.11	4128.76	10840.6	12756.4	5505.48	2497.59	2408.5	8804.03	1.47328	1.39468	1.74781	1.3569	1.55411	1.374	1.38245	1.41572	1.70302	1.90953
3567.21	5261.8	2432.96	4751.78	2439.04	3001.74	8227.39	8575.23	2360.71	2275.41	2406.42	4915.93	0.663662	0.727357	0.477184	0.7701	0.87344	0.774386	0.72538	0.698559	0.476327	0.684986	0.734533	0.741461	0.695614	0.115139			6519.72	7214.83	5237.46	6994.62	3836.63	3964.69	10991.5	12353.7	5286.31	2382.63	2155.12	8629.56	1.4531	1.39543	1.67851	1.31733	1.48134	1.3194	1.40169	1.37103	1.63522	1.82164
3280.45	5186.5	1751.77	4528.68	2037.92	2566.78	7342.42	6738.34	1584.04	1911.78	1923.57	4757.06	0.610312	0.716947	0.34358	0.733943	0.729795	0.662175	0.647355	0.548922	0.319617	0.575518	0.587148	0.717498	0.599401	0.140201			6144.46	7192.08	4529.51	6092.26	3544.19	3616.63	11072.9	11139.3	4658.41	2167.31	1807.68	8109.52	1.36947	1.39103	1.45163	1.14738	1.36842	1.20357	1.41207	1.23624	1.44099	1.65702
2715.64	4749.7	1156.55	3928.09	1583.15	1998.71	6008.88	4971.87	954.246	1501.05	1552.48	4074.56	0.505231	0.656567	0.226837	0.636608	0.566939	0.515624	0.529781	0.40502	0.192541	0.451874	0.473876	0.614559	0.481288	0.147373			5465.17	7005.76	3798.1	5077.28	3247.3	3171.4	10872	9303.39	3958.47	1845.88	1482.37	7302.7	1.21807	1.35499	1.21722	0.956229	1.25379	1.0554	1.38645	1.0325	1.22448	1.41126
2417.73	4564.76	859.289	3510.13	1240.93	1725.79	5384.6	4175.54	651.287	1260.45	1350.17	3770.04	0.449807	0.631002	0.168535	0.568871	0.444386	0.445216	0.474741	0.34015	0.131412	0.379443	0.412122	0.568629	0.41786	0.150284			5054.26	6843.75	3485.49	4565.75	2998.86	2953.01	10801.2	8426.69	3634.1	1743.37	1446.7	6847.69	1.12648	1.32365	1.11704	0.85989	1.15787	0.982722	1.37743	0.935201	1.12414	1.33289
2836.48	4862.22	1142.58	3953.35	1540.53	1988.95	6210.81	5295.95	1046.34	1481.94	1652.08	4229.3	0.527713	0.672121	0.224099	0.640702	0.551676	0.513108	0.547585	0.431421	0.211123	0.44612	0.504279	0.637898	0.49232	0.147956			5415.35	6914.83	3825.89	5048.55	3236.3	3138.84	10781.3	9392.47	3892.61	1857.42	1517.27	7194.87	1.20696	1.3374	1.22613	0.950818	1.24955	1.04457	1.37489	1.04238	1.2041	1.42009
2251.23	4384.61	503.085	3160.63	979.833	1427.98	5060.64	3868.64	419.885	1046.7	1248.89	3576.43	0.41883	0.606099	0.0986716	0.512229	0.350886	0.368388	0.446178	0.315149	0.0847214	0.315097	0.381211	0.539427	0.369741	0.157937			4677.59	6665.46	3285.45	4129.97	2086.68	2679.53	10512.8	7466.72	3300.36	1604.14	1288.11	6289.12	1.04253	1.28917	1.05293	0.777816	0.805675	0.891713	1.34065	0.828661	1.0209	1.22644
2009.81	4051.26	385.582	2825.96	761.123	1116.14	4512.29	3375.24	262.908	925.601	1119	3316.24	0.373916	0.560019	0.0756254	0.457991	0.272564	0.287939	0.397833	0.274955	0.0530477	0.278641	0.34156	0.500183	0.322856	0.152688			4286.02	6507.44	2965.14	3752.28	2162.85	2516.85	10289.4	6643.29	2996.38	1500.41	1211.83	5867.6	0.95526	1.25861	0.950275	0.706685	0.835085	0.837576	1.31215	0.737277	0.926874	1.14714
3352.43	5063.32	3097.84	4452.21	2210.23	2825.82	7451.99	8724.58	3019.58	2180.5	2507.03	4510.69	0.623703	0.69992	0.607589	0.72155	0.791501	0.729001	0.657015	0.710726	0.609268	0.656412	0.765242	0.68034	0.687689	0.0595117			6306.08	6772	5233.79	6735.36	3731.45	4099.68	10237.9	12308.6	5292.4	2446.41	2407.79	8398.03	1.40549	1.30978	1.67734	1.2685	1.44073	1.36432	1.30559	1.36602	1.6371	1.8704
3425.81	5148.21	3137.88	4472.14	2234.04	2836.81	7549.11	8715.18	3059.09	2240.09	2533.93	4592.74	0.637354	0.711655	0.615441	0.72478	0.800028	0.731837	0.665578	0.70996	0.61724	0.674352	0.773452	0.692714	0.696199	0.0579261			6361.66	6812.88	5449.76	6864.78	3822.79	4296.36	10228.8	12473.6	5504	2514.88	2584.11	8522.33	1.41788	1.31768	1.74655	1.29288	1.47599	1.42977	1.30443	1.38433	1.70256	1.92275
3441.58	5155	3100.81	4505.76	2214.14	2902.91	7498.07	8829.09	3031.73	2271.66	2543.85	4479.7	0.640289	0.712593	0.608171	0.730229	0.792902	0.748889	0.661078	0.719239	0.611721	0.683857	0.776481	0.675665	0.69676	0.0605622			6405.9	6863.76	5416.86	6848.91	3816.33	4273.15	10264.3	12502.6	5466.34	2533.23	2542.71	8578.56	1.42774	1.32752	1.73601	1.28989	1.4735	1.42205	1.30895	1.38755	1.69091	1.93678
3466.65	5230.41	3080.18	4492.14	2297.01	2919.57	7738.2	9097.72	3006.09	2314.8	2568.64	4511.19	0.644953	0.723017	0.604124	0.728021	0.82258	0.753186	0.682249	0.741123	0.606546	0.696844	0.784047	0.680415	0.705592	0.0668878			6461.45	6910.06	5417.17	7083.76	3870.82	4260.92	10342.2	12519.4	5475.27	2513.5	2455.85	8606.11	1.44012	1.33648	1.73611	1.33412	1.49454	1.41798	1.31889	1.38941	1.69367	1.92169
3393.16	5144.16	3156.23	4455.15	2212.37	2884.57	7471.04	8866.58	3063.09	2267.9	2474.21	4538.64	0.631279	0.711094	0.619041	0.722027	0.792268	0.744157	0.658695	0.722293	0.618048	0.682725	0.755224	0.684556	0.695117	0.0560586			6361.48	6774.09	5312.63	6828.39	3768.2	4255.18	10209.6	12361.2	5385.74	2522.36	2491.58	8482.41	1.41784	1.31018	1.7026	1.28602	1.45492	1.41607	1.30198	1.37185	1.66598	1.92847
3439.39	5211.52	3096.9	4451.11	2293.91	2926.53	7569.4	8959.02	3025.83	2314.69	2496.28	4528.63	0.639882	0.720406	0.607405	0.721372	0.821468	0.754982	0.667367	0.729824	0.610529	0.696809	0.761962	0.683046	0.701254	0.0639007			6460.14	6801.51	5380.8	6996.7	3752.46	4278.35	10262.6	12517.8	5426.16	2512.11	2478.12	8520.31	1.43982	1.31548	1.72445	1.31772	1.44884	1.42378	1.30874	1.38924	1.67848	1.92063
3490.5	5194.46	3024.57	4537.89	2336.85	2964.3	7824.61	9136.99	2961.66	2307.2	2535.95	4624.19	0.649389	0.718048	0.593218	0.735435	0.836846	0.764727	0.689868	0.744322	0.597581	0.694555	0.774071	0.697458	0.70796	0.0712107			6475.58	6935.38	5385.34	7090.83	3807.99	4260.28	10344	12548.6	5424.83	2465.45	2419.02	8519.31	1.44327	1.34138	1.7259	1.33545	1.47028	1.41777	1.31912	1.39265	1.67807	1.88496
3687.51	5432.16	2934.07	4707.65	2468.03	3006.42	8157.62	9106.26	2867.18	2376.2	2582.81	4892.78	0.686044	0.750905	0.575468	0.762947	0.88382	0.775592	0.719228	0.741819	0.578519	0.715326	0.788372	0.737969	0.726334	0.0851743			6537.93	7064.85	5362.2	7198.12	3832.66	4268.8	10621.5	12744.3	5407.18	2489.52	2396.43	8515.15	1.45716	1.36642	1.71849	1.35566	1.4798	1.4206	1.35451	1.41437	1.67261	1.90336
3541.75	5212.01	3079.51	4558.47	2396.49	2909.12	7784.13	8978.57	2995.52	2317.87	2549.16	4666.41	0.658925	0.720474	0.603993	0.738771	0.858202	0.750492	0.686299	0.731417	0.604413	0.697768	0.778101	0.703827	0.711057	0.0709468			6481.41	6881.41	5318.28	7030.92	3888.23	4292.4	10320.6	12605.4	5379.33	2448.62	2440.25	8418.98	1.44457	1.33094	1.70442	1.32417	1.50126	1.42846	1.31614	1.39896	1.66399	1.87209
3401.39	5042.55	3117.24	4372.11	2249.91	2809.99	7344.55	8681.36	3041.09	2225.75	2501.7	4643.39	0.632811	0.697049	0.611394	0.708569	0.80571	0.724919	0.647543	0.707205	0.613608	0.670037	0.763615	0.700355	0.690235	0.0590152			6287.29	6647.14	5238.72	6732.44	3753.02	4348.09	10076.1	12234.7	5284.72	2454.37	2437.31	8207.59	1.4013	1.28563	1.67892	1.26795	1.44906	1.44699	1.28495	1.35781	1.63473	1.87649
3507.39	5121.5	3191.33	4468.94	2316.17	2865.98	7610.57	9037.57	3106.89	2286.07	2511.94	4698.08	0.652532	0.707963	0.625926	0.72426	0.829441	0.739362	0.670997	0.736222	0.626885	0.688194	0.76674	0.708603	0.706427	0.059059			6410.38	6792.72	5333.6	6867.18	3848.21	4368.89	10187.5	12415.2	5396.52	2543.9	2487.99	8299.71	1.42873	1.31379	1.70932	1.29333	1.48581	1.45391	1.29916	1.37785	1.66931	1.94493
3451.98	5166.72	3175.89	4480.94	2310.48	2825.36	7575.6	8930.16	3097.24	2263.35	2537.72	4695.68	0.642223	0.714213	0.622897	0.726205	0.827401	0.728884	0.667913	0.727473	0.624938	0.681355	0.774611	0.708242	0.703863	0.0606473			6351.5	6781.72	5322.45	6829.31	3875.49	4401.38	10096.5	12371	5386.21	2523.76	2442.34	8227.18	1.41561	1.31166	1.70575	1.2862	1.49634	1.46472	1.28755	1.37294	1.66612	1.92954
3441.67	5091.75	3130.36	4467.8	2340.41	2763.79	7521.34	8792.86	3040.09	2200.41	2519.31	4662.76	0.640306	0.703849	0.613967	0.724077	0.838121	0.712998	0.663129	0.716288	0.613407	0.662407	0.76899	0.703276	0.696735	0.0646562			6316.11	6741.9	5286.21	6787.39	3831.78	4401.75	10008.6	12251.6	5356.73	2529.22	2421.24	8221.21	1.40772	1.30396	1.69414	1.2783	1.47946	1.46485	1.27634	1.35969	1.657	1.93371
3578.69	5166.01	3141.88	4507.6	2393.85	2812.8	7549.7	8986.97	3067.14	2250.19	2562.29	4731.38	0.665798	0.714116	0.616227	0.730526	0.857257	0.725642	0.66563	0.732101	0.618865	0.677393	0.782111	0.713626	0.708274	0.0674996			6382.84	6794.68	5295.91	6912.55	3917.6	4448.83	10102.6	12413	5352.73	2513.35	2429.63	8298.45	1.4226	1.31416	1.69724	1.30187	1.5126	1.48051	1.28833	1.3776	1.65577	1.92157
3422.29	4906.01	3008.46	4252.99	2253.27	2567.12	7364.97	8530.14	2940.73	2078.59	2403.34	4534.69	0.6367	0.678175	0.590058	0.689264	0.806916	0.662262	0.649343	0.694886	0.593359	0.625733	0.733593	0.683959	0.670354	0.0601967			6050.65	6481.32	5064.65	6491.54	3664.24	4340.32	9616.5	11714	5100.35	2393.9	2399.43	7939.45	1.34856	1.25356	1.62313	1.22258	1.41478	1.4444	1.22635	1.30003	1.5777	1.83025
3370.28	4897.75	2947.24	4269.1	2231.93	2563.18	7244.53	8523.49	2905.52	2061.78	2408.3	4527.83	0.627023	0.677032	0.57805	0.691875	0.799272	0.661247	0.638724	0.694344	0.586255	0.620676	0.735107	0.682924	0.666044	0.0624154			5971.16	6415.2	4985.8	6381.69	3646.45	4287.15	9612.55	11636.4	4999.01	2350.24	2337.81	7845.85	1.33084	1.24077	1.59786	1.20189	1.40791	1.42671	1.22584	1.29142	1.54635	1.79688
3371.87	4918.98	2835.93	4185.59	2222.02	2531.8	7241.34	8668.17	2754.22	2031.61	2392.09	4428.94	0.62732	0.679967	0.556221	0.67834	0.795724	0.65315	0.638443	0.706131	0.555727	0.611591	0.730159	0.668009	0.658398	0.0686266			5829.79	6322.44	4864.7	6238.13	3493.98	4154.7	9427.33	11447.4	4923.87	2274.56	2285.87	7650.23	1.29933	1.22283	1.55905	1.17486	1.34904	1.38263	1.20222	1.27044	1.52311	1.73901
3432.95	5025.72	3038.27	4263.26	2249.82	2591.54	7322.6	8752.47	2945.97	2118.33	2447.22	4497.99	0.638682	0.694723	0.595905	0.690928	0.805678	0.668563	0.645608	0.712997	0.594417	0.637699	0.746986	0.678424	0.675884	0.0608373			5994.17	6425.65	4989.72	6430.71	3627.07	4338.62	9554.99	11641.1	5056.23	2365.44	2360.48	7847.16	1.33597	1.24279	1.59912	1.21113	1.40042	1.44384	1.2185	1.29194	1.56405	1.8085
3419.28	4951.62	2842.33	4127.04	2230.11	2538.86	7234.99	8546.79	2754.52	2039.18	2363.26	4446.85	0.636141	0.68448	0.557475	0.668851	0.798622	0.654972	0.637884	0.696243	0.555787	0.61387	0.721356	0.670711	0.658033	0.0671655			5770.03	6307.24	4825.94	6263.84	3444.2	4189.92	9445.55	11372.1	4893.6	2275.15	2293.49	7565.91	1.28602	1.21989	1.54663	1.1797	1.32982	1.39435	1.20454	1.26208	1.51374	1.73946
3394.99	4967.99	2881.16	4132.2	2209.87	2526.61	7191.09	8575.91	2772.95	2052.31	2415.44	4444.84	0.631621	0.686742	0.565091	0.669688	0.791374	0.651812	0.634013	0.698615	0.559505	0.617824	0.737286	0.670408	0.659498	0.0661069			5812.14	6267.36	4872	6285.99	3448.65	4235.26	9465.98	11413	4958.36	2290.1	2273.28	7552.7	1.2954	1.21218	1.56139	1.18387	1.33153	1.40944	1.20715	1.26663	1.53378	1.75089
3350.19	4935.44	2908.14	4201.21	2187.04	2541.76	7191.89	8703.06	2823.25	2042.06	2410.42	4420.41	0.623286	0.682243	0.570383	0.680871	0.783198	0.655721	0.634083	0.708973	0.569654	0.614739	0.735753	0.666723	0.660469	0.0636522			5871.83	6278.25	4869.26	6302.15	3476.41	4259.02	9444.36	11410	4921.25	2329.32	2293.39	7610.81	1.3087	1.21428	1.56051	1.18691	1.34225	1.41735	1.20439	1.26629	1.52229	1.78088
3347.71	4875.93	2881.53	4167.18	2191.08	2498.22	7169.06	8569.21	2775.6	2043.01	2354.53	4415.32	0.622825	0.674016	0.565164	0.675355	0.784643	0.644489	0.63207	0.698069	0.560041	0.615023	0.718692	0.665956	0.654695	0.0632247			5832.43	6250.34	4840.56	6266.73	3470.77	4252.61	9415.97	11342.4	4915.4	2303.88	2251.49	7520.19	1.29992	1.20888	1.55131	1.18024	1.34007	1.41521	1.20077	1.25879	1.52048	1.76143
3358.92	4906.84	2863.91	4144.21	2140.65	2489.59	7169.68	8641.26	2772.26	2035	2330.52	4377.92	0.624911	0.678288	0.561708	0.671633	0.766586	0.642261	0.632125	0.703938	0.559365	0.612613	0.711363	0.660315	0.652092	0.0603067			5704.11	6203.18	4788.81	6199.82	3357.83	4219.74	9368.99	11309	4853.7	2266.24	2233.87	7470.41	1.27132	1.19976	1.53473	1.16764	1.29647	1.40427	1.19478	1.25509	1.5014	1.73265
3365.29	4983.72	2950.71	4187.34	2183.32	2536.48	7290.48	8805.84	2867.71	2085.06	2359.76	4439.04	0.626096	0.688916	0.578733	0.678623	0.781864	0.654359	0.642775	0.717346	0.578625	0.627682	0.720291	0.669533	0.663737	0.05926			5862.62	6325.91	4868.5	6330.27	3446.23	4279.69	9405.84	11402.7	4922.25	2328.98	2259.4	7595.26	1.30665	1.2235	1.56027	1.19221	1.3306	1.42423	1.19948	1.26548	1.52261	1.78062
3356.58	4997.92	2950.23	4226.45	2170.34	2549.23	7307.42	8838.65	2884.42	2046.63	2351.98	4431.5	0.624475	0.690879	0.578638	0.684962	0.777217	0.657647	0.644269	0.720018	0.581996	0.616113	0.717914	0.668396	0.663544	0.0590361			5839.04	6295.48	4919.61	6290	3436.1	4287.96	9380.6	11322.6	4960.3	2345.02	2306.36	7558.5	1.3014	1.21761	1.57665	1.18463	1.32669	1.42698	1.19626	1.25659	1.53438	1.79288
3362.11	5061.18	2951.84	4173.73	2173.57	2565.7	7302.65	8816.8	2856.45	2081.22	2309.41	4446.09	0.625504	0.699623	0.578953	0.676417	0.778374	0.661897	0.643848	0.718238	0.576353	0.626527	0.70492	0.670595	0.663438	0.0582879			5821.1	6285.42	4840.32	6189.66	3343.92	4230.52	9369.88	11276.9	4910.6	2322.69	2266.4	7452.84	1.2974	1.21567	1.55123	1.16573	1.2911	1.40786	1.19489	1.25152	1.519	1.77581
3346.82	5113.13	2897.75	4213.99	2158.9	2540.75	7324.35	8679.67	2803.34	2063.99	2359.27	4409.83	0.62266	0.706805	0.568345	0.682943	0.77312	0.65546	0.645761	0.707067	0.565638	0.621341	0.720141	0.665127	0.661201	0.0616231			5840.95	6291.42	4888.97	6178.75	3369.72	4299.62	9284.01	11331.8	4958.45	2359.93	2266.84	7534.34	1.30182	1.21683	1.56683	1.16367	1.30106	1.43086	1.18394	1.25761	1.5338	1.80428
3399.43	5096.99	2967.19	4202.05	2212.22	2632.8	7417.67	8764.92	2871.4	2123.1	2385.89	4436.63	0.632447	0.704574	0.581965	0.681008	0.792214	0.679207	0.653989	0.714012	0.579369	0.639135	0.728267	0.669169	0.67128	0.0604784			5888.07	6303.08	4929.35	6260.11	3409.35	4310.04	9393.18	11378.2	4988.82	2372.75	2274.17	7575.45	1.31232	1.21908	1.57977	1.179	1.31636	1.43433	1.19787	1.26276	1.5432	1.81408
3365.2	5072.19	2986.41	4161.41	2185.51	2620.65	7443.21	8770.76	2898.83	2111.16	2396.64	4451.09	0.626078	0.701146	0.585734	0.674421	0.782649	0.676072	0.656241	0.714488	0.584904	0.635538	0.731546	0.671349	0.670014	0.0581013			5933.47	6334.8	4961.67	6293.21	3424.51	4341.19	9403.02	11445.1	5025.48	2387.08	2264.67	7609.06	1.32244	1.22522	1.59013	1.18523	1.32222	1.44469	1.19912	1.27019	1.55454	1.82504
3409	5138.75	3039.77	4163.76	2259.54	2653.59	7525.74	8673.91	2941.99	2135.78	2407.29	4489.89	0.634227	0.710347	0.5962	0.674801	0.809159	0.684571	0.663517	0.706598	0.593613	0.642952	0.734798	0.677202	0.677332	0.0599305			6023.82	6330.78	5022.76	6419.5	3420.18	4448.28	9489.86	11682.9	5100.67	2433.12	2302.57	7829.69	1.34258	1.22444	1.6097	1.20902	1.32054	1.48033	1.2102	1.29657	1.5778	1.86024
3417.39	5096.84	3025.64	4192.8	2225.73	2682.8	7598.47	8656.42	2936.62	2132.06	2420.96	4490.26	0.635787	0.704554	0.593428	0.679508	0.797054	0.692107	0.66993	0.705173	0.59253	0.641832	0.738971	0.677258	0.677344	0.0581097			5958.79	6362.46	5003.52	6413.7	3418.15	4411.21	9463.04	11597.6	5071.05	2412.37	2280.18	7782.51	1.32809	1.23057	1.60354	1.20792	1.31976	1.468	1.20678	1.28711	1.56863	1.84437
3428.66	5060.55	2996.21	4145.18	2164.95	2668.19	7508.3	8711.27	2931.98	2123.2	2451.65	4417.47	0.637885	0.699537	0.587656	0.671791	0.775287	0.688338	0.66198	0.709641	0.591593	0.639164	0.748337	0.666279	0.673124	0.0563084			5956.72	6314.58	4988.21	6290.28	3337.98	4424.34	9361.9	11558.1	5027.39	2412.31	2243.49	7763.93	1.32762	1.22131	1.59863	1.18468	1.28881	1.47236	1.19388	1.28272	1.55513	1.84433
3388.19	5012.73	2904.93	4196.72	2167.28	2639.58	7455.08	8775.02	2837.26	2083.36	2450.76	4373.4	0.630355	0.692927	0.569753	0.680143	0.776122	0.680955	0.657288	0.714835	0.572482	0.627172	0.748066	0.659632	0.667477	0.0627208			5763.81	6214.29	4880.73	6149.79	3221.6	4318.62	9204.14	11319.6	4921.64	2337.8	2242.72	7577.47	1.28463	1.20191	1.56419	1.15822	1.24387	1.43718	1.17376	1.25626	1.52242	1.78736
3419.47	5010.2	2933.62	4190.87	2133.51	2600.69	7429.83	8668.98	2826.62	2095.99	2469.65	4318.07	0.636175	0.692577	0.57538	0.679195	0.764028	0.670922	0.655062	0.706196	0.570334	0.630973	0.753832	0.651287	0.665497	0.0600439			5765.63	6186.42	4812.32	6115.55	3214.42	4293.31	9231.24	11261	4897.82	2325.18	2230.48	7549.22	1.28503	1.19652	1.54226	1.15177	1.2411	1.42876	1.17722	1.24976	1.51505	1.77772
3419.42	4995.63	2910.92	4201.23	2120.2	2584.94	7390.63	8792.98	2814.76	2095	2445.79	4311.18	0.636166	0.690563	0.570929	0.680874	0.75926	0.666859	0.651606	0.716298	0.567941	0.630674	0.746549	0.650248	0.663997	0.0601061			5641.59	6123.88	4741.97	6013.09	3147.84	4255.86	9122.66	11172.1	4813.73	2280.98	2182.79	7384	1.25739	1.18443	1.51972	1.13247	1.21539	1.4163	1.16337	1.23989	1.48904	1.74392
3466.51	5030.02	2856.23	4312.29	2193.05	2585.51	7552.93	8920.94	2746.1	2101.8	2476.04	4532.24	0.644927	0.695316	0.560201	0.698874	0.785351	0.667007	0.665915	0.726722	0.554087	0.632723	0.755783	0.683589	0.672541	0.0694125			5582.66	6227.1	4707.38	6021.54	3191.11	4206.62	9290.79	11033.1	4781.89	2271.08	2124.07	7258.09	1.24425	1.20439	1.50863	1.13407	1.2321	1.39991	1.18481	1.22446	1.47919	1.73635
3437.54	4946.04	2870.99	4197.9	2136.69	2588.45	7440.12	8928.55	2791.49	2106.19	2447.5	4330.51	0.639536	0.683708	0.563097	0.680335	0.765166	0.667765	0.655969	0.727342	0.563247	0.634043	0.74707	0.653164	0.665037	0.0631119			5584.42	6167.45	4730.07	6026.99	3158.18	4271.98	9133.41	11074.5	4794.49	2272.85	2146.46	7304.91	1.24465	1.19285	1.5159	1.13509	1.21938	1.42166	1.16474	1.22906	1.48308	1.73771
3467.92	4952.92	2973.58	4134.31	2145.54	2712.29	7465.75	9014.49	2872.48	2153.53	2509.39	4334.06	0.645189	0.684659	0.583217	0.670029	0.768335	0.699714	0.658229	0.734343	0.579587	0.648295	0.765962	0.653698	0.674271	0.0611213			5720.75	6245.96	4915.81	6187.45	3256.05	4407.35	9116.21	11219.3	4989.05	2377.43	2193.56	7525.7	1.27503	1.20804	1.57543	1.16531	1.25717	1.46671	1.16255	1.24513	1.54327	1.81766
3411.01	4850.14	2867.44	4085.43	2151.36	2654.54	7376.38	8905.64	2755.1	2093.53	2472	4280.8	0.6346	0.670451	0.562399	0.662107	0.770418	0.684814	0.650349	0.725476	0.555903	0.630232	0.754549	0.645665	0.662247	0.0662499			5652.55	6156.88	4797.06	6070.08	3163.01	4322.31	9097.63	11083.3	4884.32	2294.4	2119.53	7402.47	1.25983	1.19081	1.53737	1.14321	1.22125	1.43841	1.16018	1.23004	1.51087	1.75418
3389.47	4847.75	2825.02	4057.95	2149.29	2646.53	7409.81	8856.4	2747.87	2100.57	2425.82	4287.41	0.630593	0.670121	0.55408	0.657653	0.769678	0.682748	0.653296	0.721464	0.554445	0.632353	0.740455	0.646663	0.659462	0.0654458			5560.88	6076.26	4770.87	5995.91	3141.07	4337.99	9044.87	10926.8	4821.08	2283.94	2103.94	7318.49	1.2394	1.17521	1.52898	1.12924	1.21278	1.44363	1.15345	1.21266	1.49131	1.74618
3576.33	4970.28	2999.07	4052.96	2186.9	2838.36	7593.02	9257.31	2896.16	2205.01	2536.5	4402.82	0.665358	0.687058	0.588217	0.656846	0.783149	0.732236	0.669449	0.754124	0.584367	0.663792	0.774237	0.66407	0.685242	0.0649556			5842.85	6277.7	5034.53	6424.19	3279.25	4586.9	9309.56	11377.8	5111.68	2414.16	2206.15	7737.31	1.30225	1.21417	1.61348	1.2099	1.26613	1.52646	1.1872	1.26272	1.5812	1.84574
3520.94	4977.75	2958.35	4037.4	2139.84	2755.6	7533.19	9156.66	2849.19	2140.47	2498.25	4332.93	0.655054	0.688091	0.580231	0.654324	0.766293	0.710887	0.664174	0.745924	0.574888	0.644363	0.76256	0.653528	0.675026	0.0631281			5722.91	6143.17	4867.02	6239.44	3202.87	4469.65	9107.09	11194.8	4955.97	2374.25	2145.21	7559.06	1.27551	1.18816	1.55979	1.1751	1.23664	1.48744	1.16138	1.24241	1.53304	1.81523
3427.62	4847.49	2823.14	4029.88	2109.68	2671.82	7416.95	9076.36	2729.66	2092.33	2426.93	4289.12	0.637691	0.670084	0.553712	0.653105	0.755494	0.689274	0.653926	0.739383	0.550771	0.629872	0.740792	0.646921	0.660086	0.0659169			5548.01	6065.75	4750.61	6062.67	3094.39	4361.58	9028.68	11017.3	4818.09	2290.78	2063.08	7317.64	1.23653	1.17318	1.52249	1.14181	1.19475	1.45148	1.15138	1.22271	1.49038	1.75141
3381.19	4910.48	2839.86	4045.17	2136.93	2683.35	7421.27	8973.64	2749.7	2093.41	2423.44	4307.03	0.629054	0.678792	0.55699	0.655582	0.765253	0.692247	0.654307	0.731015	0.554815	0.630195	0.739728	0.649622	0.661467	0.0657307			5478	6010.7	4657.23	5956.65	3024.49	4347.56	8985.63	10873.2	4714.26	2240.1	1997.17	7187.27	1.22093	1.16253	1.49256	1.12184	1.16776	1.44681	1.14589	1.20671	1.45827	1.71266
3427.14	4900.16	2909.53	4147.95	2140.45	2776.48	7532.4	9137.22	2797.02	2116.97	2458.13	4290.4	0.637602	0.677366	0.570655	0.672239	0.766514	0.716273	0.664105	0.744341	0.564361	0.637289	0.750316	0.647113	0.670681	0.065501			5586.6	6046.83	4766.3	6074.7	3127.45	4444.14	9039.11	10972.3	4853.16	2284.1	2044.85	7316.65	1.24513	1.16952	1.52751	1.14408	1.20752	1.47895	1.15271	1.21772	1.50123	1.74631
3365.02	4820.18	2770.12	4086.94	2142.27	2695.07	7433.76	8899.65	2696.33	2047.58	2430.26	4216.76	0.626045	0.66631	0.543313	0.662352	0.767164	0.695271	0.655408	0.724988	0.544046	0.616398	0.741808	0.636007	0.656593	0.0702348			5423.85	5947.79	4607.11	5896.31	2994.84	4301.79	8923.05	10817.4	4645.74	2184.25	1961.5	7080.18	1.20886	1.15037	1.4765	1.11048	1.15632	1.43158	1.13791	1.20053	1.43707	1.66996
[truncated: 5 more columns]
