# Supplementary material for: Distinct states of nucleolar stress induced by anticancer drugs
Source: eLife journal article supplement (doi:10.7554/elife.88799), 2023-07-14
Supplement: fig1-data1 [file 1B.xlsx]

## Sheet: Summ. nucleoli and nucleoplasm
Nucleoli norm.																	Nucleoplasm norm.
Cell1	Cell2	cell3	Cell4	cell5	cell6	cell7	cell8	cell9	cell10	cell11	cell12	cell13	Avg. nucleoli	stdev	sem		Cell1	Cell2	cell3	Cell4	cell5	cell6	cell7	cell8	cell9	cell10	cell11	cell12	cell13	Avg. nucleolplasm	stdev	Time
1	1	1	1	1	1	1	1	1	1	1	1	1	1	0	0		1	1	1	1	1	1	1	1	1	1	1	1	1	1	0	0
1.05066	1.01518	1.01294	1.02006	1.0405	0.997516	0.992615	1.21034	0.990262	1.04376	1.03071	1.06071	1.07722	1.04173	0.0572094	0.015867		1.04511	0.967315	0.97628	0.987077	0.877074	0.965655	1.00857	0.85037	0.974847	0.998715	1.01173	0.945628	1.02864	0.972078	0.0555266	1
1.1017	1.01897	1.03706	1.05184	1.02673	0.98384	1.00877	1.2421	0.978749	1.05895	1.06658	1.09369	1.10895	1.05984	0.0688511	0.0190959		1.01005	0.989191	0.977815	0.999998	0.895727	0.952469	1.01598	0.77211	0.976528	0.969009	0.998398	1.02161	0.97019	0.965314	0.0666209	2
1.14997	1.02005	1.05976	1.07344	1.00557	0.995109	1.02659	1.2492	0.983725	1.09542	1.08942	1.15717	1.1815	1.08361	0.0810614	0.0224824		0.974616	1.00019	0.984305	1.00066	0.928618	0.940404	1.02919	0.829855	0.957826	0.962556	1.02318	1.00078	0.981692	0.970298	0.0515793	3
1.18183	1.03704	1.08001	1.09524	1.03396	0.998141	1.05039	1.24587	1.00207	1.13109	1.1377	1.2183	1.24137	1.11177	0.088374	0.0245105		0.946933	0.998207	0.97863	1.00906	0.934345	0.947117	1.05285	0.828024	0.961	0.961061	1.06219	0.968024	1.01943	0.974375	0.0595845	4
1.21989	1.03992	1.09712	1.12452	1.04609	1.02443	1.09186	1.27516	1.01317	1.14213	1.16557	1.23857	1.27127	1.13459	0.0933399	0.0258878		0.962156	1.01361	1.01352	1.03909	0.965939	0.951796	1.06705	0.789462	0.953948	0.975963	1.06639	1.00406	1.01064	0.985663	0.0708268	5
1.22304	1.04028	1.1187	1.15797	1.02665	1.04484	1.09035	1.27499	1.02889	1.14887	1.20069	1.25631	1.29463	1.14663	0.0971175	0.0269355		0.966106	1.01437	0.9976	1.07778	0.976683	0.951637	1.04959	0.846086	0.955868	0.981882	1.11024	1.00204	1.03078	0.996975	0.0656407	6
1.29098	1.04863	1.13234	1.18808	0.999023	1.0804	1.12298	1.30696	1.06115	1.14888	1.23299	1.26301	1.32674	1.1694	0.107556	0.0298306		0.939332	1.03468	0.986411	1.08216	1.02837	0.928228	1.04645	0.771269	0.932618	0.956098	1.11138	0.960648	1.02714	0.984984	0.0868315	7
1.3007	1.0582	1.17799	1.19278	1.01002	1.08006	1.13167	1.40192	1.07032	1.16614	1.2301	1.29542	1.4484	1.19721	0.134251	0.0372345		0.948285	1.02333	0.987102	1.09262	0.994081	0.91122	1.04929	0.71539	0.924103	0.965908	1.06275	0.999433	1.05327	0.978983	0.0962934	8
1.34893	1.08574	1.20248	1.23892	1.03597	1.10428	1.16919	1.42711	1.09677	1.21057	1.27923	1.31782	1.55092	1.23599	0.147925	0.0410269		0.889011	1.02637	1.00744	1.05113	0.934501	0.903591	1.02786	0.698123	0.908819	0.952131	1.08206	0.919052	1.04095	0.957002	0.101122	9
1.38953	1.10767	1.21027	1.25787	1.04049	1.14829	1.16723	1.39841	1.11617	1.21146	1.30839	1.42465	1.63976	1.26309	0.165196	0.0458172		0.81664	1.00741	1.02489	1.06776	0.982445	0.901984	1.02944	0.59461	0.912225	0.947017	1.06487	0.925247	0.95948	0.941078	0.126104	10
1.42827	1.14447	1.23971	1.2749	1.01912	1.143	1.19825	1.47924	1.10962	1.2354	1.34587	1.41249	1.63658	1.28207	0.172048	0.0477175		0.870628	0.987954	1.03036	1.01757	0.975639	0.90724	1.02827	0.674643	0.923276	0.971127	1.05342	0.888094	1.00829	0.948963	0.100942	11
1.53213	1.19215	1.2392	1.31268	1.04762	1.20195	1.19375	1.53405	1.18318	1.27288	1.38761	1.43136	1.71346	1.32631	0.184845	0.0512669		0.831308	0.978622	1.05075	1.00139	0.908074	0.88203	1.01602	0.692363	0.896536	0.987154	1.05188	0.860787	0.99823	0.935011	0.102792	12
1.53483	1.1823	1.25295	1.31915	1.07651	1.23053	1.21083	1.59016	1.22336	1.30087	1.38608	1.41705	1.73461	1.34302	0.184913	0.0512856		0.845947	0.979003	1.04876	1.03616	0.957749	0.884521	1.00855	0.761022	0.913096	0.973737	1.04247	0.88899	1.00213	0.949395	0.0862379	13
1.5391	1.19843	1.26099	1.33649	1.07578	1.2029	1.23424	1.63018	1.1889	1.31175	1.40272	1.43495	1.82768	1.35724	0.208264	0.057762		0.778183	0.993437	1.00382	1.03667	0.867236	0.897823	1.01821	0.693488	0.911395	0.963207	1.01565	0.914721	0.979292	0.928703	0.101662	14
1.62429	1.21742	1.26269	1.36036	1.03146	1.21835	1.24867	1.9335	1.21325	1.33626	1.43303	1.41622	1.86207	1.39674	0.263641	0.0731207		0.797354	0.962851	1.0268	1.01979	0.863186	0.878709	1.00427	0.663312	0.89193	0.975905	1.03576	0.889357	0.955007	0.920325	0.106318	15
1.66229	1.20463	1.25428	1.35974	1.06389	1.27287	1.26794	1.72611	1.26116	1.37621	1.43998	1.43364	1.91635	1.40301	0.236612	0.0656243		0.790563	0.935141	1.00286	0.991087	0.857483	0.915363	0.99497	0.569254	0.913972	0.953422	1.04809	0.827134	1.01113	0.908498	0.127229	16
1.68592	1.191	1.24498	1.37703	1.0825	1.24937	1.27481	1.70164	1.24647	1.38766	1.46618	1.43164	1.90365	1.4033	0.235014	0.065181		0.771696	0.997781	1.00627	0.97728	0.817098	0.903647	1.00024	0.58263	0.908412	0.94088	1.06875	0.829555	1.01881	0.909465	0.131997	17
1.62037	1.20223	1.23647	1.37572	1.08279	1.26241	1.25542	1.82408	1.26208	1.40323	1.52986	1.46327	1.88582	1.41567	0.242905	0.0673698		0.775546	0.988158	0.948443	0.973987	0.868013	0.899521	0.976556	0.655962	0.910656	0.946328	1.081	0.878379	0.906646	0.9084	0.104935	18
1.64137	1.18915	1.23407	1.41148	1.05832	1.25218	1.2659	1.87675	1.24382	1.42306	1.5383	1.54785	1.94409	1.4328	0.26805	0.0743438		0.742067	0.974049	0.973163	0.969236	0.773626	0.882945	0.995031	0.684065	0.890638	0.93643	1.12749	0.714044	0.825222	0.883693	0.129863	19
1.67842	1.24589	1.23221	1.41501	1.06909	1.30312	1.29428	1.86924	1.27335	1.41798	1.51165	1.64576	1.96415	1.4554	0.265752	0.0737062		0.737816	0.938298	0.961085	0.963261	0.836833	0.854978	0.9894	0.631501	0.874011	0.975026	1.09208	0.762192	0.878629	0.884239	0.122822	20
1.69607	1.22682	1.25087	1.43746	1.08361	1.30206	1.28803	1.77902	1.30123	1.44414	1.51507	1.73922	2.01471	1.46756	0.268597	0.0744955		0.733349	0.96548	0.962577	0.947802	0.856986	0.874721	0.961885	0.731057	0.886575	0.933385	1.12251	0.814894	0.88754	0.898366	0.104599	21
1.80226	1.26183	1.23971	1.45259	1.13682	1.30325	1.3012	1.86676	1.313	1.47819	1.54837	1.61123	2.04021	1.48888	0.274334	0.0760864		0.809785	0.949503	0.929184	0.967897	0.828468	0.891383	0.952409	0.716785	0.895845	0.936752	1.08534	0.789746	0.869476	0.894044	0.0939416	22
1.82253	1.24773	1.24957	1.46508	1.15172	1.3296	1.31075	2.10583	1.3301	1.49221	1.58688	1.7166	2.10878	1.53211	0.319555	0.0886286		0.79884	0.99476	0.935393	0.959453	0.771185	0.870746	0.960908	0.757535	0.884579	0.926859	1.10847	0.779237	0.835361	0.891025	0.103114	23
1.86719	1.30025	1.24207	1.48769	1.11217	1.36672	1.3449	2.38665	1.36884	1.53878	1.59755	1.77838	2.11498	1.5774	0.368084	0.102088		0.740405	0.995332	0.910634	0.947739	0.794146	0.849229	0.977727	0.64054	0.862878	0.930408	1.09665	0.786557	0.819627	0.873221	0.120787	24
1.94071	1.31173	1.25947	1.48474	1.14414	1.38272	1.33209	2.24395	1.37634	1.55286	1.59508	1.71081	2.12823	1.57407	0.342142	0.0948932		0.790783	0.964674	0.890841	0.967923	0.835212	0.883844	0.972131	0.804628	0.889448	0.952271	1.11015	0.783093	0.882203	0.902092	0.0915143	25
2.00126	1.33832	1.25376	1.4971	1.17394	1.35466	1.34404	2.17397	1.35629	1.52171	1.61504	1.68649	2.1291	1.57274	0.334185	0.0926863		0.775101	0.9737	0.91304	0.971916	0.878851	0.86833	0.95644	0.709394	0.884851	0.954023	1.11795	0.788379	0.91266	0.900356	0.104326	26
1.99223	1.36059	1.27021	1.52749	1.16568	1.44179	1.36959	2.30075	1.40795	1.58255	1.68567	1.74424	2.17248	1.61702	0.350271	0.0971477		0.795326	0.935218	0.887431	0.98893	0.856483	0.865934	0.962757	0.64475	0.885274	0.952505	1.10197	0.803661	0.950431	0.894667	0.110916	27
2.11615	1.3714	1.27706	1.5528	1.1472	1.47034	1.39294	2.34049	1.44113	1.59324	1.71163	1.72925	2.13057	1.63648	0.360196	0.0999003		0.732393	0.966248	0.883676	0.946183	0.863003	0.862686	0.942345	0.670117	0.884341	0.959364	1.051	0.841397	1.01352	0.893559	0.105921	28
2.143	1.42364	1.28143	1.55879	1.16221	1.50917	1.41731	2.19793	1.48064	1.58259	1.71718	1.74411	2.09814	1.6397	0.328713	0.0911687		0.697699	0.937956	0.905872	0.966865	0.819463	0.860007	0.903886	0.612462	0.880494	0.952131	1.05395	0.77546	1.00868	0.874994	0.123707	29
2.17298	1.43762	1.29928	1.58217	1.14685	1.4784	1.41872	2.27628	1.47215	1.59477	1.78372	1.81775	2.20473	1.66811	0.360407	0.0999589		0.775451	0.968321	0.891088	0.95669	0.836843	0.855948	0.868742	0.691223	0.875256	0.947945	1.0553	0.77001	0.981578	0.882646	0.100264	30
2.12555	1.42478	1.31321	1.61815	1.20585	1.46149	1.44196	2.15984	1.48764	1.60827	1.84999	1.80161	2.17548	1.66722	0.327962	0.0909604		0.746514	0.995233	0.916195	0.94933	0.842937	0.870739	0.916739	0.677419	0.908435	0.929037	1.06857	0.764481	1.00254	0.891397	0.110493	31
2.24093	1.50206	1.31407	1.6106	1.19521	1.49528	1.44602	2.12878	1.48926	1.59204	1.82377	1.88009	2.21852	1.68743	0.342105	0.0948828		0.758794	0.962452	0.897192	0.95698	0.827964	0.84827	0.913914	0.638446	0.898596	0.920461	1.07599	0.761186	1.06111	0.886258	0.121699	32
2.40753	1.55078	1.34407	1.63796	1.25767	1.61894	1.46007	2.74073	1.6134	1.56651	1.7957	1.92382	2.23048	1.78059	0.435685	0.120837		0.647663	0.964827	0.927575	0.954168	0.867546	0.862325	0.930329	0.668816	0.925193	0.953834	1.08856	0.781094	1.05833	0.894636	0.131127	33
2.2902	1.55033	1.36592	1.64915	1.27082	1.57022	1.49621	2.48328	1.56082	1.60089	1.84879	1.91267	2.24432	1.7572	0.375427	0.104125		0.72391	0.95533	0.903157	0.936597	0.84695	0.844947	0.944821	0.533689	0.904931	0.931056	1.08031	0.786577	1.02022	0.877884	0.139019	34
2.40828	1.59833	1.36668	1.67829	1.23375	1.72482	1.52837	2.47649	1.69574	1.5937	1.83034	1.92107	2.27091	1.79437	0.383113	0.106256		0.668858	0.958061	0.932971	0.93248	0.837447	0.862506	0.940135	0.667744	0.913342	0.961283	1.09197	0.806894	1.0463	0.893846	0.12589	35
2.56493	1.64122	1.36199	1.68433	1.23841	1.64875	1.54495	2.50427	1.62701	1.58033	1.82911	1.90997	2.32692	1.80478	0.416667	0.115563		0.645623	0.954178	0.952096	0.954511	0.830238	0.860565	0.911018	0.625741	0.922618	0.910285	1.05069	0.742884	1.04416	0.877278	0.134527	36
2.69126	1.68577	1.37957	1.7116	1.20351	1.6808	1.54548	2.57633	1.66922	1.53197	1.85856	1.97813	2.37514	1.83749	0.453326	0.12573		0.61022	0.920369	0.948235	0.91701	0.945683	0.85385	0.936467	0.693998	0.92105	0.936493	1.0192	0.78048	1.03241	0.885805	0.122531	37
2.7848	1.73676	1.40391	1.73625	1.16762	1.64199	1.5254	2.66258	1.62986	1.49169	1.82524	2.06887	2.36466	1.8492	0.488484	0.135481		0.638946	0.914625	0.907675	0.906605	0.91761	0.858434	0.937886	0.538764	0.926674	0.97077	0.983255	0.827968	1.04872	0.875226	0.139765	38
2.69096	1.80736	1.3895	1.76432	1.17065	1.69029	1.59283	2.76069	1.67196	1.57802	1.86128	2.10655	2.39859	1.88331	0.480373	0.133232		0.615102	0.942352	0.915066	0.975087	0.8501	0.858126	0.924056	0.691058	0.908302	0.951736	0.988565	0.747604	0.969863	0.872078	0.117567	39
2.73676	1.83002	1.41677	1.79433	1.19496	1.75491	1.62032	2.76272	1.71209	1.6373	1.86915	2.00398	2.45668	1.90692	0.475721	0.131941		0.678745	0.90617	0.947986	0.923581	0.921967	0.859178	0.913721	0.565583	0.912715	0.96495	1.0375	0.79805	1.00948	0.879971	0.131171	40
2.73027	1.88882	1.44056	1.83275	1.15082	1.71482	1.61123	2.73578	1.66587	1.58138	1.93402	2.13783	2.53598	1.92001	0.491248	0.136248		0.63582	0.949664	0.975651	0.934088	0.982963	0.870344	0.909789	0.656439	0.922553	0.959135	1.02951	0.777528	1.00937	0.893296	0.126977	41
2.77455	1.89242	1.47032	1.8231	1.16463	1.71215	1.66382	2.7834	1.69513	1.62068	1.90979	2.17218	2.58262	1.94345	0.500272	0.13875		0.64938	0.951863	0.925153	0.943651	0.919814	0.87226	0.892721	0.614559	0.900564	0.951313	1.00023	0.805888	0.994881	0.878637	0.120877	42
2.76559	1.97072	1.47237	1.86723	1.1323	1.79	1.67052	2.94025	1.75881	1.84297	1.98623	2.24878	2.56488	2.00082	0.511259	0.141798		0.619875	0.897719	0.947159	0.925981	0.909108	0.869869	0.903119	0.682577	0.908035	0.95872	0.993662	0.739235	1.03476	0.87614	0.121976	43
2.73883	1.96486	1.48923	1.81427	1.13562	1.75614	1.5996	2.90493	1.74141	1.80564	2.052	2.14654	2.53921	1.97602	0.503358	0.139606		0.638971	0.938288	0.923233	0.942463	0.962398	0.906457	0.923772	0.655888	0.943845	0.965357	0.98776	0.775322	1.0569	0.893896	0.125701	44
2.7641	2.02636	1.50134	1.87886	1.16738	1.77499	1.67544	2.74217	1.75991	1.85476	2.05612	2.31097	2.68749	2.01538	0.491262	0.136251		0.572792	0.907751	0.911287	0.921502	0.92116	0.91206	0.893048	0.589332	0.929908	0.94107	1.00555	0.672163	1.00968	0.860562	0.147849	45
2.70392	2.02349	1.54696	1.88012	1.17356	1.87983	1.66438	2.74214	1.83196	1.90803	2.10223	2.28399	2.56195	2.02327	0.457626	0.126923		0.583799	0.946155	0.939226	0.960125	0.922972	0.906554	0.895868	0.605221	0.935367	0.928111	0.991901	0.712671	1.00294	0.871608	0.141552	46
2.75636	2.041	1.55232	1.88204	1.15126	1.79249	1.64863	2.86145	1.77114	1.91314	2.1496	2.19335	2.55854	2.02087	0.486746	0.134999		0.586917	0.95855	0.919389	0.960885	0.942791	0.93278	0.894533	0.55047	0.977215	0.986043	0.974806	0.768127	1.01876	0.882405	0.151951	47
2.65493	2.0614	1.57256	1.85051	1.19087	1.81301	1.66487	2.69771	1.75666	1.88258	2.16432	2.21545	2.55195	2.00591	0.445079	0.123443		0.612321	0.889937	0.915305	0.968476	1.01279	0.945055	0.917342	0.62938	0.977502	1.00337	0.966944	0.793983	0.991272	0.894128	0.134277	48
2.70275	2.0668	1.59326	1.89892	1.16646	1.84398	1.70893	2.61311	1.81917	1.9468	2.17662	2.21145	2.57841	2.02513	0.43699	0.121199		0.597658	0.928505	0.908648	0.970798	1.02091	0.927575	0.900627	0.619212	0.95063	0.971131	0.957962	0.745762	1.03085	0.886943	0.141777	49
2.74688	2.10603	1.62628	1.91963	1.2339	1.85956	1.71942	2.82161	1.85293	1.93146	2.20767	2.36518	2.56187	2.07326	0.458651	0.127207		0.602746	0.917773	0.926599	0.919356	0.998237	0.927994	0.898828	0.679699	0.963333	0.948296	0.979402	0.766424	1.05975	0.891418	0.130313	50
2.65143	2.09313	1.63263	1.91402	1.25751	1.87088	1.70449	2.70863	1.87128	1.92696	2.25607	2.30604	2.61551	2.0622	0.432295	0.119897		0.639565	0.943481	0.943911	0.968494	1.08775	0.928111	0.913906	0.660309	0.951644	0.981036	0.960424	0.743128	1.01212	0.902606	0.1354	51
2.7059	2.11254	1.66365	1.93907	1.20196	1.88082	1.65854	2.83323	2.20136	1.90657	2.28588	2.22489	2.65587	2.09771	0.463444	0.128536		0.603431	0.931915	0.962822	1.01117	1.05587	0.971266	0.942023	0.637611	0.989855	0.988574	0.99246	0.799178	1.04154	0.917516	0.146043	52
2.68801	2.08577	1.63582	1.92123	1.19632	1.89893	1.65181	2.66976	1.87483	1.9138	2.31096	2.25257	2.62761	2.05596	0.445556	0.123575		0.603871	0.987103	0.934451	0.988987	1.1337	0.979791	0.929312	0.681507	0.995421	1.0271	0.985934	0.833275	1.12226	0.93867	0.153031	53
2.82778	2.11675	1.6703	1.94219	1.21323	1.82038	1.69017	2.7698	1.81849	1.92376	2.28072	2.34654	2.73622	2.08895	0.485418	0.134631		0.6748	0.904135	0.950571	0.953701	1.10803	0.964018	0.920607	0.652724	0.984621	1.00241	1.00833	0.733321	1.04259	0.915374	0.141288	54
2.71862	2.14375	1.6724	1.9596	1.22645	1.93665	1.70287	2.79668	1.93756	1.89839	2.30433	2.30176	2.76846	2.10519	0.466903	0.129496		0.589619	0.924226	0.933153	0.963119	1.18281	0.933557	0.938256	0.656992	0.944597	0.996726	0.969715	0.773217	0.986626	0.907124	0.153502	55
2.72588	2.20731	1.63886	1.93395	1.22328	1.9361	1.72057	2.86187	2.22692	1.90157	2.28324	2.30766	2.74934	2.13204	0.474681	0.131653		0.664743	0.857433	0.938845	0.993792	1.17087	0.995398	0.948868	0.655303	1.01813	1.04773	0.997729	0.799894	1.05183	0.93389	0.151567	56
2.85059	2.22686	1.63982	1.95476	1.24557	1.91127	1.79227	2.84933	1.87922	1.95241	2.31597	2.30432	2.81083	2.13333	0.490236	0.135967		0.681117	0.878097	0.902965	0.985342	1.21083	0.94422	0.917946	0.562972	0.960054	1.05655	0.956369	0.707979	1.05605	0.909268	0.173099	57
2.84728	2.22086	1.63194	1.93826	1.23471	1.90773	1.83709	2.82362	1.88387	1.94157	2.34388	2.30517	2.77481	2.13006	0.484229	0.134301		0.671243	0.919809	0.872181	0.973215	1.15468	0.937573	0.904717	0.569823	0.950993	1.00653	0.938907	0.745379	1.05335	0.899877	0.157336	58
2.76997	2.22025	1.64779	1.96086	1.29383	1.90857	1.8132	2.80973	1.87396	1.91733	2.33529	2.30788	2.80396	2.12789	0.467989	0.129797		0.670099	0.915526	0.918909	0.978323	1.11272	0.949604	0.912224	0.525395	0.974371	1.03017	0.943943	0.768188	1.02501	0.901883	0.159461	59
2.72712	2.24798	1.65125	1.96475	1.30606	1.95686	1.7917	2.9174	1.93414	1.98089	2.33943	2.31144	2.83569	2.15113	0.474328	0.131555		0.744103	0.857152	0.899122	0.987908	1.17849	0.951512	0.925516	0.612181	0.968278	1.02164	0.945398	0.773469	1.06766	0.91788	0.146928	60
2.7467	2.288	1.65966	1.98387	1.2667	1.98217	1.80918	2.9123	1.94082	1.97621	2.35941	2.37866	2.87171	2.16734	0.486128	0.134828		0.781675	0.852624	0.905767	0.960508	1.17437	0.939908	0.898631	0.505105	0.961575	1.06443	0.93504	0.773936	1.00687	0.904649	0.161205	61
2.73486	2.21463	1.6694	1.96308	1.34671	1.97652	1.94536	2.83076	1.96442	2.01633	2.35526	2.36028	2.80499	2.16789	0.443127	0.122901		0.676793	0.839256	0.892859	0.975303	1.14987	0.921999	0.897642	0.580756	0.939721	1.04353	0.923363	0.835458	1.0762	0.904058	0.153242	62
2.74172	2.30363	1.6812	1.97582	1.29301	2.03995	1.86575	2.74786	2.01767	2.00598	2.27218	2.34902	2.89672	2.1685	0.452269	0.125437		0.812889	0.860907	0.902534	0.981427	1.23705	0.971639	0.900748	0.654413	0.986569	1.1154	0.950727	0.772666	1.06257	0.939196	0.151091	63
2.78435	2.19874	1.71129	1.98576	1.29029	2.04859	1.98395	3.04215	2.01278	1.85061	2.41946	2.40846	2.86153	2.19984	0.4932	0.136789		0.771543	0.874862	0.958358	0.950882	1.16114	0.927197	0.885003	0.565508	0.950975	1.07823	0.922121	0.717512	1.02743	0.906982	0.154901	64
2.8252	2.28365	1.73915	1.99177	1.3495	2.08724	1.99481	2.82736	2.05689	1.85383	2.37864	2.43075	2.93737	2.21201	0.464819	0.128918		0.781174	0.828828	0.913775	0.956941	1.12874	0.924782	0.878692	0.57867	0.935607	1.09719	0.897826	0.767306	1.00987	0.899954	0.144077	65
2.87472	2.22694	1.6905	2.02813	1.26755	2.07665	2.00817	2.96379	2.01532	1.85402	2.4134	2.43367	2.86806	2.2093	0.49574	0.137493		0.846926	0.772742	0.919985	0.915476	1.16972	0.949451	0.894418	0.510119	0.961015	1.13065	0.878301	0.788265	1.05896	0.907387	0.168652	66
2.77818	2.28993	1.7255	2.02569	1.32276	2.08694	2.01097	2.77247	2.0768	1.86335	2.3819	2.29955	2.83156	2.18966	0.439004	0.121758		0.838363	0.822481	0.942284	0.970566	1.20431	0.945958	0.905914	0.567725	0.947981	1.12195	0.890018	0.832993	1.06881	0.927643	0.157176	67
2.82817	2.16972	1.72081	2.03312	1.31582	2.0346	2.10852	2.98844	2.00116	1.89893	2.39298	2.2263	2.95019	2.20529	0.484996	0.134514		0.822771	0.826259	0.93351	0.955105	1.10446	0.941514	0.862251	0.634162	0.9515	1.05992	0.868422	0.745102	1.0731	0.906006	0.133509	68
2.81474	2.36581	1.71309	2.00283	1.31442	2.02946	2.00848	2.98529	1.99021	1.79451	2.27356	2.33499	2.90507	2.1948	0.489636	0.135801		0.874298	0.76926	0.961139	0.976331	1.20345	1.00337	0.912913	0.645269	1.01181	1.13335	0.944392	0.781494	1.09058	0.946743	0.154388	69
2.791	2.27291	1.74242	2.03041	1.28068	2.04259	2.06201	2.8619	2.02468	1.91514	2.38083	2.42817	2.916	2.21144	0.467922	0.129778		0.850074	0.834637	1.00082	0.964639	1.15819	0.927614	0.876221	0.728032	0.927655	1.07532	0.90191	0.766303	1.02533	0.925904	0.120774	70
2.78683	2.27447	1.74653	2.0578	1.30084	2.0769	2.0174	3.21755	2.04751	1.83192	2.3391	2.29432	2.87761	2.22068	0.508981	0.141166		0.853706	0.767377	1.01978	0.967841	1.17905	0.970684	0.889287	0.616183	0.968761	1.09197	0.919385	0.760512	1.10703	0.931658	0.15638	71
2.78987	2.21177	1.76895	2.07642	1.30045	2.10247	2.10766	2.70415	2.05976	1.90041	2.37767	2.26299	2.98018	2.20329	0.445725	0.123622		0.821718	0.77323	0.967094	0.927826	1.06855	0.946664	0.879272	0.653645	0.963852	1.08626	0.905775	0.769457	1.09443	0.912136	0.132575	72
2.77503	2.29715	1.80075	2.04134	1.31411	2.04297	1.98844	2.82981	1.99109	1.77481	2.32381	2.2895	2.96256	2.18703	0.46571	0.129165		0.918272	0.760812	0.992261	1.01691	1.10786	0.966512	0.895282	0.656651	0.958442	1.11205	0.938284	0.766097	1.13496	0.940338	0.144507	73
2.77616	2.48061	1.8233	2.04017	1.37086	2.0441	2.06269	2.87892	2.373	1.80109	2.3534	2.33951	2.9011	2.24961	0.452891	0.125609		0.86657	0.67841	1.00224	0.976823	1.09745	0.985588	0.915491	0.700929	0.987792	1.12872	0.911356	0.702367	1.12817	0.929378	0.156207	74
2.84253	2.35526	1.80751	2.04461	1.30886	2.08166	2.08752	2.85526	2.04746	1.85006	2.36127	2.28992	2.95181	2.22183	0.465846	0.129202		0.911303	0.714206	0.986916	0.977465	1.07631	0.982235	0.906967	0.711922	0.959556	1.12391	0.909316	0.683967	1.07454	0.924509	0.142761	75
2.89755	2.55682	1.82764	2.03773	1.34212	1.92039	2.08656	2.84818	2.26545	1.95963	2.34714	2.31172	2.92869	2.25613	0.466571	0.129403		0.897597	0.641743	1.01978	0.98263	1.13537	1.03427	0.953316	0.67041	0.993684	1.15342	0.944386	0.679137	1.07609	0.937065	0.171698	76
2.77435	2.44569	1.79423	2.02214	1.35952	1.9303	2.12227	2.94998	2.28141	1.83109	2.35929	2.28402	3.00089	2.24271	0.476711	0.132216		0.812063	0.75366	0.969094	0.962273	1.1089	0.999414	0.871567	0.62322	0.991211	1.11078	0.941995	0.660159	1.13526	0.918431	0.166259	77
2.88906	2.58475	1.82224	2.038	1.40201	2.00716	2.06404	2.84356	2.37475	1.81714	2.34613	2.36078	2.92707	2.26744	0.46478	0.128907		0.750326	0.781527	0.998656	0.954955	1.13071	0.996132	0.902759	0.723756	0.984647	1.12352	0.940778	0.755232	1.11189	0.934991	0.144757	78
2.842	2.54119	1.85224	2.03953	1.38733	1.94491	2.0632	3.04607	2.25643	1.84244	2.38875	2.31099	2.90223	2.26287	0.479239	0.132917		0.860605	0.77909	1.00355	0.958656	1.17952	1.02509	0.869545	0.565133	1.00827	1.06411	0.931605	0.683122	1.09881	0.925161	0.172036	79
2.80651	2.55769	1.85274	2.06256	1.3783	2.08439	2.05417	3.10837	2.36966	1.79567	2.41856	2.34262	2.86864	2.28461	0.481719	0.133605		0.780588	0.858743	0.9913	0.922539	1.13993	0.999518	0.88908	0.552336	0.99359	1.10591	0.911781	0.734256	1.13909	0.924512	0.168667	80
2.87518	2.56788	1.82947	2.07825	1.346	2.00692	2.06963	2.76606	2.38568	1.7713	2.44278	2.30234	2.87374	2.25502	0.46094	0.127842		0.782705	0.823412	0.981348	0.876789	1.12509	1.01747	0.8743	0.694953	0.972826	1.10993	0.932577	0.65939	1.19183	0.926356	0.162894	81
2.87946	2.58377	1.82344	2.06468	1.32754	2.095	2.06089	2.86173	2.10688	1.79333	2.41895	2.33994	2.91386	2.2515	0.475675	0.131928		0.880685	0.785158	1.00767	0.922895	1.15279	1.01033	0.892685	0.62373	0.987569	1.12526	0.935897	0.681532	1.16347	0.936129	0.167832	82
2.91539	2.56142	1.87302	2.04777	1.34716	1.95646	1.98865	3.09738	2.26018	1.96823	2.35154	2.34207	2.94038	2.28074	0.497745	0.13805		0.885117	0.906209	0.987053	0.940791	1.10282	1.07394	0.904771	0.604363	1.0479	1.16791	0.941018	0.747862	1.15572	0.958881	0.159977	83
2.88488	2.59387	1.85369	2.06975	1.35755	2.07294	2.02605	3.28521	2.4118	1.78497	2.37602	2.19139	2.91919	2.29441	0.527922	0.146419		0.799142	0.858924	0.997124	0.89996	1.16843	1.00162	0.891326	0.688551	0.992272	1.13015	0.925319	0.710958	1.15423	0.939847	0.15554	84
2.84051	2.6288	1.87583	2.06614	1.33606	1.94824	1.88576	2.99745	2.25886	1.74901	2.32727	2.39334	2.94056	2.24983	0.503169	0.139554		0.883123	0.863676	0.995997	0.932365	1.16014	1.07107	0.889572	0.648639	1.04134	1.10879	0.933986	0.689977	1.12583	0.949577	0.158108	85
2.78258	2.192	1.83424	2.07397	1.3408	2.07616	2.01567	2.94706	2.04998	1.83151	2.47899	2.34509	2.91014	2.2214	0.464604	0.128858		0.830686	0.902038	1.00278	0.891157	1.17553	1.03431	0.841555	0.697986	1.03665	1.09459	0.913845	0.736978	1.19598	0.950314	0.155893	86
2.89855	2.12087	1.83546	2.06707	1.37037	2.14017	2.05342	2.81302	2.39129	1.88372	2.47187	2.26298	2.92161	2.24849	0.450794	0.125028		0.872127	0.878564	1.0271	0.89837	1.16918	1.00379	0.851386	0.756049	1.00413	1.05702	0.924531	0.720443	1.16214	0.948065	0.138666	87
2.99238	2.40649	1.88018	2.09884	1.36624	2.14441	1.97493	2.9772	2.43388	1.9152	2.47153	2.45335	2.8133	2.30215	0.469945	0.130339		0.784988	0.938635	0.996644	0.914709	1.15885	1.03817	0.910688	0.648346	1.04338	1.0538	0.940274	0.643419	1.12017	0.937852	0.162104	88
3.02326	2.34732	1.87678	2.12588	1.34857	2.1579	1.99037	2.85735	2.40083	1.97325	2.48059	2.24315	2.93024	2.28888	0.466822	0.129473		0.778687	0.970595	0.998452	0.942323	1.17992	1.01982	0.938902	0.808594	0.996787	1.05784	0.93805	0.727384	1.08105	0.9568	0.125873	89
3.08353	2.20415	1.82544	2.14561	1.34376	2.18523	2.07942	2.91583	2.44921	2.09449	2.53212	2.42206	2.9482	2.32531	0.480688	0.133319		0.838107	0.936547	0.982689	0.918572	1.16263	1.01783	0.887964	0.715782	1.00846	0.967438	0.894013	0.67272	1.1437	0.934343	0.141819	90
3.04146	2.24233	1.82891	2.13692	1.34482	2.1653	1.99883	3.02342	2.40401	2.09869	2.50414	2.34063	2.94154	2.31315	0.487354	0.135168		0.860488	0.940142	0.974935	0.909701	1.13346	1.03104	0.932815	0.781259	1.02772	0.981752	0.920942	0.709015	1.1808	0.95262	0.128612	91
