# Supplementary material for: Distinct states of nucleolar stress induced by anticancer drugs
Source: eLife journal article supplement (doi:10.7554/elife.88799), 2023-07-14
Supplement: fig1-data1 [file 1C.xlsx]

## Sheet: Nucleolin contr. vs CX
Time, sec	Average contr.	Stdev contr.	Average 1.5uM CX	Stdev CX
	1.0016	0.00451074	0.999544	0.00940202
	1.00167	0.00796261	0.993842	0.0108918
	1.00357	0.00662356	0.999751	0.0100514
	1.00339	0.00631122	0.993878	0.0106264
0	0.0953894	0.0329215	0.062389	0.0280662
0.5	0.196841	0.053865	0.216387	0.0503356
1	0.264467	0.0680993	0.31816	0.0687712
1.5	0.331006	0.0823255	0.407246	0.0838345
2	0.394735	0.0935544	0.477467	0.0885448
2.5	0.445323	0.106891	0.539154	0.0931221
3	0.484117	0.103759	0.586465	0.0968319
3.5	0.524454	0.112158	0.637362	0.0949254
4	0.557153	0.110414	0.671493	0.0976512
4.5	0.587141	0.112889	0.704003	0.0971284
5	0.618524	0.114771	0.731047	0.0891023
5.5	0.6423	0.114136	0.75151	0.0887332
6	0.661641	0.108398	0.771623	0.0879188
6.5	0.685635	0.110069	0.795032	0.0813964
7	0.705916	0.112197	0.811007	0.0747567
7.5	0.721538	0.112311	0.829613	0.0715984
8	0.738847	0.109755	0.83721	0.0683915
8.5	0.75127	0.106686	0.847843	0.0619183
9	0.764831	0.10534	0.854371	0.0645566
9.5	0.777969	0.101782	0.866553	0.0574052
10	0.792122	0.101529	0.874489	0.058219
10.5	0.800514	0.0975684	0.884489	0.0551136
11	0.810186	0.0960711	0.88849	0.048077
11.5	0.818661	0.0926564	0.898614	0.0434597
12	0.825221	0.0879247	0.900606	0.0416817
12.5	0.833597	0.084391	0.908311	0.0417785
13	0.84012	0.0807094	0.912763	0.0388036
13.5	0.845584	0.0771448	0.916455	0.0360992
14	0.851894	0.0758852	0.919803	0.0316179
14.5	0.85909	0.075118	0.926572	0.0339865
15	0.865689	0.0708417	0.931319	0.0290214
15.5	0.87044	0.0709664	0.93451	0.0281672
16	0.874484	0.0639752	0.938896	0.0286811
16.5	0.881931	0.0659626	0.939325	0.0286943
17	0.885344	0.0629701	0.941465	0.022854
17.5	0.890377	0.0614187	0.947764	0.0254765
18	0.890584	0.0554401	0.943741	0.0218667
18.5	0.896933	0.056669	0.948957	0.0253338
19	0.899605	0.0570194	0.951833	0.0193199
19.5	0.899147	0.0508216	0.95202	0.0209681
20	0.905489	0.0501317	0.958321	0.0192539
20.5	0.907623	0.0476696	0.954388	0.0200785
21	0.907782	0.0445301	0.957885	0.0168881
21.5	0.911785	0.0465572	0.955866	0.0214045
22	0.9134	0.044722	0.958289	0.0142612
22.5	0.918841	0.0448822	0.962354	0.0143174
23	0.921711	0.0423339	0.966471	0.0160268
23.5	0.921555	0.0378942	0.963687	0.0192617
24	0.921793	0.0358086	0.965793	0.0161682
24.5	0.92388	0.0365162	0.967687	0.0165616
25	0.927978	0.0377432	0.966951	0.0159212
25.5	0.929855	0.0334731	0.969608	0.0130817
26	0.932559	0.0321658	0.970624	0.0132864
26.5	0.93392	0.0343581	0.971367	0.0137994
27	0.935924	0.0327434	0.969004	0.0130873
27.5	0.937606	0.0336059	0.970909	0.00952097
28	0.937248	0.0321337	0.97081	0.0171781
28.5	0.939344	0.0341184	0.968845	0.0157889
29	0.942489	0.0312271	0.969747	0.0183043
29.5	0.940112	0.0281624	0.964107	0.0192314
30	0.939041	0.0272581	0.971885	0.0193757
30.5	0.944346	0.0255624	0.977498	0.0157796
31	0.943803	0.0258049	0.969914	0.0205795
31.5	0.945184	0.027735	0.964805	0.0221503
32	0.947437	0.0260429	0.968923	0.0127496
32.5	0.950323	0.029192	0.968624	0.020525
33	0.947746	0.027095	0.967984	0.0217889
33.5	0.950937	0.0284589	0.967538	0.0183359
34	0.949548	0.0259112	0.973464	0.0141532
34.5	0.950921	0.0299447	0.972448	0.0157777
35	0.948745	0.0257459	0.972901	0.0151072
35.5	0.951621	0.0265279	0.97652	0.0144563
36	0.952826	0.0277773	0.976051	0.0174859
36.5	0.95573	0.0242489	0.974386	0.00898775
37	0.952624	0.0231119	0.972072	0.0149596
37.5	0.955662	0.025315	0.976379	0.0133311
38	0.955519	0.0237721	0.975579	0.0183404
38.5	0.954746	0.0253262	0.974944	0.0173406
39	0.956048	0.0247335	0.974009	0.0161658
39.5	0.953407	0.023658	0.976622	0.0162133
40	0.958224	0.0270801	0.969731	0.0195438
40.5	0.959469	0.0258727	0.970425	0.0144986
41	0.957452	0.0229908	0.976714	0.0213613
41.5	0.959052	0.0231296	0.976382	0.0162664
42	0.961731	0.0255493	0.975821	0.0144935
42.5	0.960518	0.0281634	0.972831	0.0190676
43	0.959138	0.0226707	0.976059	0.0184664
43.5	0.960902	0.0230798	0.975569	0.0134561
44	0.961479	0.0236092	0.977585	0.0176178
44.5	0.961715	0.0264017	0.976026	0.0149967
45	0.963271	0.0261639	0.97885	0.0138701
45.5	0.961388	0.0291201	0.974528	0.0194331
46	0.960427	0.0266374	0.970954	0.0172142
46.5	0.964952	0.0235373	0.97474	0.0154341
47	0.964929	0.0250716	0.975393	0.0164472
47.5	0.961756	0.0245648	0.973723	0.0155929
48	0.963059	0.0265162	0.974762	0.0147124
48.5	0.960981	0.0251987	0.975562	0.0163303
49	0.963541	0.0239972	0.970825	0.0205543
49.5	0.965252	0.028058	0.971413	0.023197
50	0.962752	0.0288272	0.974021	0.020358
50.5	0.967972	0.028311	0.976527	0.0179847
51	0.967102	0.0262376	0.9699	0.0248347
51.5	0.96657	0.0279255	0.971885	0.0253616
52	0.964349	0.0286379	0.969695	0.0208877
52.5	0.962833	0.028433	0.971628	0.0235139
53	0.964537	0.0281876	0.973434	0.0243438
53.5	0.962412	0.027774	0.970615	0.0226094
54	0.960454	0.028644	0.970882	0.024606
54.5	0.963453	0.0274201	0.97705	0.0227997
55	0.96564	0.0293841	0.976189	0.0199617
55.5	0.962546	0.0313663	0.977555	0.0142255
56	0.959595	0.034726	0.973549	0.0204205
56.5	0.96355	0.0335568	0.977377	0.0198436
57	0.965655	0.0340774	0.97548	0.0215787
57.5	0.963031	0.0350546	0.972427	0.01722
58	0.963001	0.0379022	0.975063	0.0188283
58.5	0.964221	0.0359579	0.975235	0.0226597
59	0.963032	0.0363808	0.9731	0.0196954
59.5	0.963415	0.0349554	0.974198	0.0198323
60
60.5
61
61.5
62
62.5
63
63.5
64
64.5
65
65.5
66
66.5
67
67.5
68
68.5
69
69.5
70
70.5
71
71.5
72
72.5
73
73.5
74
74.5
75
75.5
76
76.5
77
77.5
78
78.5
79
79.5
80
80.5
81
81.5
82
82.5
83
83.5
84
84.5
85
85.5
86
86.5
87
87.5
88
88.5
89
89.5
90
90.5
91
91.5
92
92.5
93
93.5
94
94.5
95
95.5
96
96.5
97
97.5
98
98.5
99
99.5
100
100.5
101
101.5
102
102.5
103
103.5
104
104.5
105
105.5
106
106.5
107
107.5
108
108.5
109
109.5
110
110.5
111
111.5
112
112.5
113
113.5
114
114.5
115
115.5
116
116.5
117
117.5
118
118.5
119
119.5
120
120.5
121
121.5
122
122.5
123
123.5
124
124.5
125
125.5
126
126.5
127
127.5
128
128.5
129
129.5
130
130.5
131
131.5
132
132.5
133
133.5
134
134.5
135
135.5
136
136.5
137
137.5
138
138.5
139
139.5
140
140.5
141
141.5
142
142.5
143
143.5
144
144.5
145
145.5
146
146.5
147
147.5
148
148.5
149
149.5
150
150.5
151
151.5
152
152.5
153
153.5
154
154.5
155
155.5
156
156.5
157
157.5
158
158.5
159
159.5
160
160.5
161
161.5
162
162.5
163
163.5
164
164.5
165
165.5
166
166.5
167
167.5
168
168.5
169
169.5
170
170.5
171
171.5
172
172.5
173
173.5
174
174.5
175
175.5
176
176.5
177
177.5
178
178.5
179
179.5

## Sheet: Nucleolin contr.
	f mobile	thalf, sec
Cell_1	0.938689	2.46443
Cell_2	0.889551	2.34708
Cell_3	0.931869	1.839
Cell_4	0.957224	5.37955
Cell_5	0.980595	7.2091
Cell_6	0.9675	4.87941
Cell_7	1.00984	4.64705
Cell_8	0.901295	6.53887
Cell_9	0.940731	4.0143
Cell_10	0.962573	6.53887
Cell_11	0.935911	2.71704
Cell_12	1.00249	2.99553
Cell_13	0.971328	7.2091
Cell_14	0.945919	5.37955
	Average	4.58278
	Stdev	1.88409

## Sheet: Nucleolin CX
	f mobile	thalf, sec
Cell1	0.972826	2.99553
Cell2a	0.965611	1.24471
Cell2b	0.983987	4.64705
Cell3	0.984761	3.82314
Cell4	0.974066	2.46443
Cell5	0.965002	2.34708
Cell6	0.961231	2.46443
Cell7	0.934655	2.99553
Cell8	0.971416	2.58766
Cell9	0.96932	3.4677
Cell10	0.969857	2.71704
	Average	2.88676
	Stdev	0.88313
