# Supplementary material for: Distinct states of nucleolar stress induced by anticancer drugs
Source: eLife journal article supplement (doi:10.7554/elife.88799), 2023-07-14
Supplement: fig1-data1 [file 1D.xlsx]

## Sheet: UBF contr. vs.CX
Time, sec	Avg contr.	StDev	Avg CX 5461	StDev
-2.5	0.999736	0.00241541	1.00105	0.000765422
-2	1.00015	0.0203312	1.00282	0.0128021
-1.5	1.00003	0.0151731	1.00317	0.0126209
-1	0.997642	0.0198144	1.00396	0.016316
-0.5	0.997983	0.0208358	1.00125	0.0147853
0	0.0607158	0.0353965	0.0324808	0.0162387
0.5	0.112924	0.0570044	0.0793848	0.0176859
1	0.162994	0.064621	0.116489	0.022065
1.5	0.197295	0.0741479	0.149279	0.0296201
2	0.235573	0.0850742	0.1835	0.0351256
2.5	0.2702	0.0891892	0.210293	0.0421844
3	0.302685	0.0941954	0.236356	0.0463621
3.5	0.328013	0.0982274	0.265189	0.0535821
4	0.347439	0.106397	0.285118	0.0557383
4.5	0.371636	0.109098	0.304392	0.06119
5	0.396064	0.115827	0.325052	0.0627954
5.5	0.421922	0.109662	0.344328	0.0655054
6	0.440817	0.109277	0.361895	0.0675737
6.5	0.451033	0.11644	0.382127	0.0703854
7	0.471802	0.118674	0.397901	0.0711934
7.5	0.481956	0.117198	0.414269	0.0726716
8	0.495772	0.117105	0.429118	0.0749387
8.5	0.509798	0.120391	0.439928	0.0734613
9	0.522461	0.11619	0.45594	0.0732257
9.5	0.532437	0.116217	0.467323	0.0771618
10	0.545564	0.123017	0.485647	0.0752169
10.5	0.560815	0.117779	0.494292	0.0758346
11	0.564743	0.121417	0.507531	0.0811254
11.5	0.574753	0.114115	0.515812	0.0809068
12	0.584313	0.118533	0.528505	0.0807383
12.5	0.600556	0.124786	0.540529	0.0790066
13	0.60352	0.122873	0.548348	0.0815962
13.5	0.607427	0.125852	0.560159	0.0812976
14	0.617225	0.120329	0.56949	0.0854504
14.5	0.619311	0.124844	0.578669	0.0824551
15	0.634448	0.117826	0.588763	0.0795456
15.5	0.635815	0.115485	0.593327	0.0868389
16	0.643358	0.115672	0.602063	0.0814783
16.5	0.651116	0.115947	0.613411	0.0821333
17	0.653716	0.120947	0.620761	0.0861173
17.5	0.665076	0.116223	0.631098	0.0837387
18	0.66897	0.122036	0.639833	0.0848722
18.5	0.669556	0.114769	0.636586	0.0855998
19	0.676838	0.113519	0.650909	0.0831253
19.5	0.689257	0.115957	0.654774	0.0851344
20	0.686055	0.107501	0.656913	0.0885067
20.5	0.691097	0.115257	0.666421	0.0852612
21	0.692707	0.113429	0.672622	0.0873126
21.5	0.696236	0.111602	0.675549	0.0826272
22	0.703796	0.109342	0.680881	0.0804531
22.5	0.70419	0.112707	0.69436	0.0794823
23	0.716799	0.111264	0.692064	0.0796625
23.5	0.715209	0.113023	0.706162	0.0803382
24	0.710192	0.110878	0.707761	0.0765674
24.5	0.726882	0.112603	0.70208	0.0737405
25	0.724377	0.105458	0.709978	0.0786143
25.5	0.735196	0.109954	0.7163	0.0753864
26	0.740526	0.112597	0.723673	0.0771524
26.5	0.740798	0.104345	0.721135	0.0768481
27	0.744557	0.108212	0.730907	0.0783538
27.5	0.749706	0.113886	0.738344	0.0732808
28	0.747249	0.110185	0.73909	0.0708678
28.5	0.763852	0.100254	0.74369	0.0753187
29	0.753894	0.104023	0.745603	0.080303
29.5	0.757681	0.100378	0.747913	0.0753649
30	0.761468	0.104434	0.751293	0.073324
30.5	0.75901	0.0953238	0.753506	0.0756428
31	0.769656	0.0963238	0.756332	0.0729071
31.5	0.76882	0.105715	0.759262	0.0777133
32	0.77103	0.10153	0.768816	0.0729334
32.5	0.77163	0.0962209	0.764592	0.0751709
33	0.77602	0.0986094	0.769355	0.0726021
33.5	0.783408	0.099383	0.777142	0.0697918
34	0.78185	0.0944549	0.780804	0.0751174
34.5	0.781652	0.0924936	0.782732	0.0753429
35	0.790963	0.0986085	0.782438	0.0736496
35.5	0.784287	0.0928194	0.788573	0.0778322
36	0.78426	0.0985338	0.787698	0.0711252
36.5	0.793925	0.0913845	0.784765	0.0759837
37	0.785022	0.0914696	0.790578	0.073591
37.5	0.793423	0.0922976	0.794096	0.0778754
38	0.799949	0.0919736	0.794462	0.0765785
38.5	0.801806	0.0957835	0.797406	0.0782812
39	0.798996	0.0990441	0.799304	0.0758566
39.5	0.802874	0.0937606	0.805685	0.0790592
40	0.812787	0.0940416	0.809428	0.0740032
40.5	0.806386	0.0932286	0.807076	0.0823225
41	0.822488	0.0889173	0.817018	0.0762096
41.5	0.808952	0.0902071	0.814494	0.0769148
42	0.813362	0.0892755	0.81307	0.0746004
42.5	0.820591	0.0835291	0.815326	0.0771302
43	0.821393	0.0898999	0.818093	0.0785084
43.5	0.824234	0.0902759	0.823767	0.0766625
44	0.820073	0.0927139	0.819952	0.0803274
44.5	0.8298	0.0820055	0.822327	0.076268
45	0.831404	0.0852776	0.823558	0.0767939
45.5	0.840454	0.0910479	0.828666	0.074757
46	0.834631	0.0885105	0.830472	0.0751626
46.5	0.834283	0.0916503	0.828191	0.0740343
47	0.832268	0.0900662	0.832687	0.0686131
47.5	0.839951	0.0885091	0.837152	0.0763048
48	0.831064	0.0852207	0.834654	0.0731443
48.5	0.841694	0.0808436	0.839138	0.0724615
49	0.841811	0.0803134	0.837321	0.0735558
49.5	0.831898	0.0868647	0.840185	0.0761923
50	0.838796	0.080137	0.838531	0.0717942
50.5	0.842253	0.0852051	0.842339	0.07216
51	0.845051	0.0891729	0.847535	0.0736291
51.5	0.845568	0.0928477	0.844895	0.0716759
52	0.845897	0.0843326	0.847882	0.0708807
52.5	0.842006	0.0732266	0.844114	0.0700065
53	0.852176	0.0780532	0.84744	0.0730597
53.5	0.849124	0.0881148	0.854803	0.0708662
54	0.85258	0.0835092	0.853623	0.0676768
54.5	0.846437	0.0836072	0.855494	0.0670822
55	0.853712	0.0825369	0.856518	0.0667166
55.5	0.861785	0.0853773	0.855516	0.068006
56	0.857834	0.0837777	0.856906	0.0698186
56.5	0.857592	0.081778	0.859232	0.0675086
57	0.860541	0.0805683	0.859334	0.0697399
57.5	0.853433	0.0819934	0.863407	0.0678838
58	0.863904	0.0830137	0.858232	0.0713031
58.5	0.86644	0.0792454	0.860396	0.0664912
59	0.855962	0.081868	0.863963	0.064442
59.5	0.858219	0.0833042	0.869815	0.0700628
60	0.862418	0.0814842	0.865416	0.0701496
60.5	0.859564	0.0769316	0.873721	0.0663337
61	0.862349	0.0676138	0.87785	0.0705291
61.5	0.859458	0.0702261	0.872044	0.0687638
62	0.863717	0.0773799	0.874275	0.0723508
62.5	0.869638	0.072403	0.876933	0.0675606
63	0.869709	0.0846224	0.874132	0.0725338
63.5	0.873734	0.0778857	0.874548	0.0725631
64	0.863585	0.0843973	0.884793	0.0743885
64.5	0.867527	0.0761178	0.881331	0.0678863
65	0.878446	0.0813	0.885911	0.0707746
65.5	0.869459	0.0741541	0.881131	0.076307
66	0.876971	0.0764537	0.884985	0.0711663
66.5	0.875922	0.0818598	0.879051	0.0711955
67	0.876486	0.080356	0.880368	0.0728696
67.5	0.874858	0.0722039	0.886811	0.0704303
68	0.868432	0.0774853	0.885965	0.0674268
68.5	0.877123	0.0772165	0.885727	0.0704466
69	0.879018	0.0766097	0.884466	0.065276
69.5	0.876906	0.0849949	0.889655	0.0633725
70	0.874461	0.0752436	0.891442	0.0689347
70.5	0.872705	0.0814993	0.891895	0.06505
71	0.879086	0.0759829	0.891477	0.0673861
71.5	0.883617	0.073939	0.892829	0.0711645
72	0.8791	0.0805391	0.889489	0.0758267
72.5	0.883249	0.0720393	0.892684	0.0658608
73	0.882383	0.0783397	0.896981	0.0744044
73.5	0.879256	0.0778011	0.895946	0.0732041
74	0.885682	0.078182	0.898696	0.0700532
74.5	0.899724	0.0604213	0.900963	0.069452
75	0.899486	0.0669421	0.899608	0.0669221
75.5	0.906343	0.0634897	0.902471	0.0648883
76	0.901372	0.0662723	0.894286	0.0681601
76.5	0.897625	0.0708852	0.905689	0.0653767
77	0.892897	0.0651817	0.900135	0.0659954
77.5	0.896371	0.0648659	0.898942	0.0690375
78	0.90109	0.0686675	0.906727	0.066022
78.5	0.905852	0.0605112	0.903372	0.0701815
79	0.892347	0.0643643	0.904334	0.0675852
79.5	0.902248	0.0587659	0.902408	0.0666762
80	0.900479	0.0649514	0.904908	0.0606652
80.5	0.90534	0.0689478	0.904426	0.0661507
81	0.904937	0.0688289	0.909361	0.0614911
81.5	0.915168	0.0727032	0.901617	0.0665256
82	0.907078	0.0706306	0.907679	0.0659715
82.5	0.907802	0.0704073	0.907886	0.0599397
83	0.904675	0.071003	0.909967	0.0640222
83.5	0.903059	0.0671127	0.908564	0.0620635
84	0.907202	0.0686243	0.912385	0.0634897
84.5	0.910183	0.0653428	0.913569	0.0634146
85	0.904269	0.0639009	0.907945	0.0618993
85.5	0.909763	0.0757404	0.917392	0.0610491
86	0.912778	0.0702239	0.911054	0.0664138
86.5	0.912825	0.0685693	0.911875	0.0612391
87	0.906623	0.0648364	0.918828	0.0558218
87.5	0.908244	0.0654993	0.913062	0.0578006
88	0.905429	0.0616118	0.915491	0.063045
88.5	0.901785	0.0689718	0.920116	0.0569774
89	0.90689	0.0697604	0.918731	0.0663244
89.5	0.906044	0.0670653	0.918513	0.0648003
90	0.911296	0.0662622	0.919742	0.0694987
90.5	0.910046	0.0649028	0.919369	0.0639619
91	0.913556	0.0703996	0.917131	0.0642116
91.5	0.913223	0.0645998	0.914646	0.0723968
92	0.906638	0.0705309	0.919318	0.0628762
92.5	0.915221	0.0652287	0.919329	0.0647742
93	0.91059	0.0672483	0.919123	0.0576197
93.5	0.909435	0.0583369	0.916435	0.0637228
94	0.907974	0.0555695	0.917701	0.060994
94.5	0.917803	0.0550166	0.921132	0.0640624
95	0.90454	0.0575286	0.923403	0.0550228
95.5	0.921518	0.0611428	0.927577	0.0628999
96	0.921866	0.0630952	0.9285	0.0641432
96.5	0.910688	0.0526669	0.928238	0.0582667
97	0.915858	0.0524647	0.921848	0.062639
97.5	0.914338	0.0612979	0.926969	0.0592078
98	0.921653	0.0631849	0.92262	0.0602624
98.5	0.908097	0.0563842	0.921644	0.0524526
99	0.919008	0.0598871	0.922594	0.06114
99.5	0.913043	0.0632221	0.924568	0.065057
100	0.914439	0.0558769	0.917912	0.0646399
100.5	0.917234	0.0615923	0.908967	0.0468553
101	0.91503	0.0616651	0.909215	0.0458568
101.5	0.913135	0.0537325	0.907067	0.0478077
102	0.920097	0.055811	0.908851	0.0424691
102.5	0.918334	0.0568919	0.908957	0.0450134
103	0.922128	0.0624855	0.908263	0.0503928
103.5	0.92325	0.0603963	0.913671	0.0542797
104	0.922817	0.0532259	0.915797	0.0496208
104.5	0.910163	0.0548009	0.910774	0.055562
105	0.916034	0.0609772	0.910538	0.0508099
105.5	0.916515	0.0538432	0.909976	0.0467604
106	0.918718	0.0617731	0.914149	0.0489082
106.5	0.919263	0.0505581	0.906146	0.0518215
107	0.919766	0.0495236	0.907484	0.0472636
107.5	0.923212	0.0490665	0.915939	0.0534267
108	0.927694	0.0545457	0.911301	0.05086
108.5	0.915683	0.0570309	0.909599	0.0524764
109	0.926819	0.0557359	0.914514	0.0445049
109.5	0.916171	0.0567801	0.914976	0.0393168
110	0.927242	0.0543867	0.911823	0.0429814
110.5	0.929819	0.049919	0.916224	0.0485411
111	0.923601	0.0481797	0.914949	0.0522816
111.5	0.928388	0.048663	0.913697	0.0518195
112	0.935379	0.0540759	0.917047	0.0487064
112.5	0.922031	0.0604885	0.920023	0.0473376
113	0.924922	0.0580202	0.919186	0.0495472
113.5	0.931113	0.0562725	0.917437	0.0433068
114	0.930279	0.056353	0.916356	0.0470373
114.5	0.93061	0.0571279	0.919125	0.0467359
115	0.930885	0.0563252	0.912464	0.0478241
115.5	0.9317	0.0533176	0.919958	0.0469168
116	0.934706	0.055858	0.919698	0.0457961
116.5	0.934536	0.0566836	0.922541	0.0501769
117	0.92703	0.0607986	0.920534	0.0494581
117.5	0.931355	0.0534031	0.921257	0.0469139
118	0.931506	0.0509895	0.919939	0.042118
118.5	0.926897	0.0585282	0.920401	0.0453204
119	0.937804	0.0558124	0.916398	0.0477207
119.5	0.936064	0.0564078	0.922871	0.0451034
120	0.941798	0.0609489	0.923457	0.05143
120.5	0.932055	0.0544413	0.924673	0.0485795
121	0.932222	0.052292	0.924765	0.0454868
121.5	0.938573	0.049451	0.932304	0.0514485
122	0.933779	0.0593224	0.927486	0.0536068
122.5	0.93072	0.0474557	0.926603	0.0482178
123	0.933898	0.0514188	0.925019	0.0413766
123.5	0.934856	0.0472598	0.925628	0.0480963
124	0.933068	0.055473	0.924589	0.0524287
124.5	0.941902	0.0453369	0.925044	0.0473611
125	0.945681	0.050146	0.929463	0.0443779
125.5	0.93466	0.0593508	0.930844	0.0448188
126	0.928733	0.056483	0.927132	0.0502476
126.5	0.932232	0.0550504	0.928624	0.0451073
127	0.937869	0.0538541	0.921461	0.0466719
127.5	0.931403	0.0605723	0.921569	0.0455119
128	0.928424	0.051957	0.92875	0.0468569
128.5	0.925845	0.051462	0.924556	0.0452269
129	0.93578	0.0544379	0.92299	0.0400452
129.5	0.931243	0.0487455	0.927855	0.0401707
130	0.932899	0.0544628	0.924989	0.0438856
130.5	0.93506	0.0598133	0.927732	0.0428119
131	0.933254	0.05368	0.928534	0.0423674
131.5	0.933546	0.0566674	0.929405	0.0442188
132	0.93308	0.0567057	0.929506	0.0423692
132.5	0.930543	0.0501116	0.929095	0.0479917
133	0.924308	0.055564	0.924758	0.0422742
133.5	0.935814	0.0547296	0.927561	0.0358603
134	0.934552	0.0512618	0.927455	0.0458245
134.5	0.93213	0.0531439	0.925793	0.0500846
135	0.934641	0.0512996	0.93567	0.042661
135.5	0.935638	0.0550651	0.933536	0.0462461
136	0.934466	0.0528437	0.929266	0.0396078
136.5	0.929383	0.051077	0.92611	0.0403403
137	0.934371	0.0491953	0.924502	0.0328402
137.5	0.934109	0.0607611	0.929902	0.03997
138	0.938016	0.0537808	0.935093	0.0431444
138.5	0.936795	0.0575131	0.93165	0.040667
139	0.933998	0.0550257	0.9303	0.0432695
139.5	0.934139	0.0525926	0.931346	0.0455003
140	0.950046	0.0487907	0.93305	0.0483749
140.5	0.938057	0.0617192	0.932207	0.0446868
141	0.947575	0.0526755	0.932113	0.0509628
141.5	0.937824	0.054055	0.929169	0.0450342
142	0.945374	0.0494809	0.93319	0.0407859
142.5	0.937121	0.0547489	0.936179	0.0446908
143	0.946356	0.0539969	0.932777	0.0413539
143.5	0.949433	0.048374	0.935847	0.0421572
144	0.948774	0.0552312	0.936386	0.0373546
144.5	0.942488	0.0534471	0.931521	0.0365957
145	0.936719	0.0483828	0.93643	0.0377926
145.5	0.9318	0.0523629	0.934986	0.0371542
146	0.946069	0.0538223	0.933382	0.0371421
146.5	0.937991	0.0450546	0.934124	0.045944
147	0.947106	0.0398248	0.932498	0.0422169
147.5	0.952683	0.0519123	0.940411	0.0361391
148	0.940543	0.0587793	0.937905	0.0424124
148.5	0.945452	0.0531677	0.940334	0.0349501
149	0.940714	0.0510872	0.935961	0.0448307
149.5	0.943858	0.0424128	0.938925	0.0438096
150	0.932463	0.0558176	0.936091	0.0441222
150.5	0.931436	0.0543626	0.935786	0.0385132
151	0.942689	0.0479684	0.933028	0.0480284
151.5	0.939062	0.0581077	0.938386	0.0469398
152	0.940478	0.0537871	0.935008	0.0497162
152.5	0.937854	0.0514654	0.937933	0.0456519
153	0.93156	0.052062	0.939181	0.0404192
153.5	0.931114	0.0524501	0.937246	0.0470755
154	0.935395	0.0564809	0.936895	0.0456475
154.5	0.936496	0.0533053	0.938796	0.0467322
155	0.931473	0.0517147	0.944716	0.0438709
155.5	0.932138	0.0562007	0.938271	0.0419518
156	0.933681	0.0553246	0.939535	0.0491959
156.5	0.941385	0.0553914	0.937746	0.0435632
157	0.938323	0.0595402	0.945938	0.0422223
157.5	0.947229	0.0517391	0.942151	0.0430082
158	0.93637	0.0476382	0.942897	0.0355169
158.5	0.942625	0.0500642	0.937618	0.0428036
159	0.95088	0.0514833	0.941146	0.0396038
159.5	0.945258	0.0515199	0.94341	0.0388755
160	0.944509	0.0634286	0.944428	0.0424249
160.5	0.943459	0.0505724	0.936749	0.0503825
161	0.940868	0.0459004	0.936913	0.0471254
161.5	0.950769	0.0546362	0.9405	0.0466509
162	0.949251	0.0566653	0.937369	0.0465298
162.5	0.937321	0.05803	0.941092	0.044066
163	0.945303	0.0628015	0.936605	0.0454649
163.5	0.95192	0.0607306	0.939658	0.0417408
164	0.944521	0.0580625	0.942907	0.0453301
164.5	0.939872	0.0531264	0.943864	0.0458683
165	0.947963	0.0562494	0.932584	0.0462543
165.5	0.940293	0.0595836	0.943596	0.039852
166	0.952175	0.0581413	0.947276	0.0493208
166.5	0.950494	0.0461681	0.942346	0.0404007
167	0.94724	0.0664199	0.94158	0.0394401
167.5	0.940788	0.0620509	0.943781	0.0383055
168	0.940306	0.0617276	0.940382	0.0418007
168.5	0.94886	0.0651794	0.943392	0.0352825
169	0.943087	0.0638298	0.939734	0.034604
169.5	0.951215	0.0595884	0.935956	0.0390065
170	0.951101	0.0609511	0.936023	0.0371862
170.5	0.952904	0.0599006	0.934213	0.0303428
171	0.951624	0.062044	0.93984	0.038993
171.5	0.93921	0.0592378	0.934916	0.0332184
172	0.941553	0.0624696	0.945899	0.0395296
172.5	0.947493	0.0638347	0.945961	0.0432662
173	0.939336	0.0713201	0.93794	0.0417349
173.5	0.932541	0.0671873	0.940914	0.0377298
174	0.948995	0.0693448	0.94051	0.0335236
174.5	0.94178	0.0578422	0.94041	0.0377992
175	0.94901	0.0680459	0.940994	0.0394949
175.5	0.948732	0.0730141	0.939162	0.0445256
176	0.951178	0.0800338	0.938097	0.0423423
176.5	0.942548	0.0697965	0.937719	0.0445123
177	0.943664	0.0693589	0.941072	0.0359884
177.5	0.957977	0.0834252	0.945127	0.0489755
178	0.952274	0.0712158	0.946865	0.0394268
178.5	0.957389	0.0632545	0.945128	0.0348453
179	0.953951	0.0642694	0.945068	0.041049
179.5	0.951886	0.0684029	0.946633	0.0394596
180	0.942824	0.059475	0.94532	0.0413928
180.5	0.954826	0.0649129	0.946124	0.0392033
181	0.953366	0.0510025	0.943142	0.0429294
181.5	0.950804	0.0613587	0.940882	0.04353
182	0.954376	0.0616064	0.942287	0.0385517
182.5	0.946515	0.0666916	0.94092	0.0402898
183	0.94692	0.0588748	0.945765	0.0463655
183.5	0.941252	0.0666976	0.949449	0.050009
184	0.949111	0.0717029	0.946169	0.0479427
184.5	0.936077	0.071334	0.950957	0.04426
185	0.944405	0.0711016	0.94472	0.047364
185.5	0.954929	0.0719417	0.94589	0.0428028
186	0.959454	0.0668094	0.941687	0.0398183
186.5	0.922062	0.0428637	0.946591	0.0444636
187	0.940214	0.0440456	0.94706	0.0442208
187.5	0.927269	0.0333338	0.946016	0.0438519
188	0.936411	0.0174529	0.944358	0.0422731
188.5	0.933132	0.0381766	0.942784	0.0447147
189	0.925651	0.0454296	0.948097	0.0408618
189.5	0.931899	0.0308308	0.948761	0.043978
190	0.934391	0.0197433	0.944297	0.0436949
190.5	0.931331	0.0337052	0.948997	0.0396862
191	0.921631	0.0342014	0.946081	0.0466651
191.5	0.935143	0.0563305	0.943071	0.0383209
192	0.92747	0.0375673	0.94605	0.0378165
192.5	0.944893	0.0489412	0.955681	0.0410307
193	0.940942	0.039156	0.948363	0.0432578
193.5	0.94329	0.0344898	0.952585	0.044465
194	0.933591	0.0396011	0.947174	0.0370564
194.5	0.936257	0.0551275	0.953402	0.0452522
195	0.929242	0.0515428	0.947046	0.0395367
195.5	0.936166	0.0543966	0.950587	0.0457515
196	0.941391	0.0202469	0.954084	0.0396404
196.5	0.923768	0.0332089	0.946293	0.0381384
	0.92171	0.0525279
	0.936327	0.0505244
	0.922748	0.0422123
	0.926893	0.0416518
	0.947149	0.0523048
	0.926169	0.0366052
	0.925596	0.0448589
	0.921464	0.0438974
	0.938603	0.0283726
	0.937877	0.0286898
	0.920276	0.0383145
	0.929405	0.0431002
	0.926318	0.0279431
	0.914706	0.0410227
	0.939278	0.0522351
	0.926875	0.0723955
	0.922488	0.0418698
	0.938358	0.0363633
	0.929749	0.0476439
	0.940526	0.0399999
	0.923591	0.0307569
	0.92834	0.05738
	0.944726	0.0547736
	0.935933	0.0380317
	0.925595	0.0626737
	0.941123	0.0452045
	0.946462	0.0608759
	0.944437	0.0567378
	0.939458	0.0824695
	0.940192	0.0591757
	0.929339	0.0315511
	0.934261	0.0676138
	0.929216	0.0294934
	0.930468	0.0577932
	0.945568	0.065502
	0.914343	0.0486583
	0.900476	0.0839165
	0.927992	0.0581582
	0.90942	0.0433136
	0.921253	0.0689184
	0.917884	0.0705816
	0.902288	#DIV/0!

## Sheet: UBF Contr.
	F mob	T 1/2, sec
Cell _1	0.829784	10.9401
Cell _2	0.902008	11.7205
Cell _3	0.972306	11.3024
Cell _4	0.914151	8.80907
Cell _5	0.919155	15.56
Cell _6	0.906596	20.1916
Cell _7	0.822516	21.2883
Cell _8	1.01295	12.0973
Cell _9	0.895502	8.14604
Cell _10	0.890229	8.04179
Cell _11	1.00188	7.26143
avg	0.915189	12.3053
SD	0.0612302	4.79455

## Sheet: UBF CX 5461
	F mob	T 1/2, sec
Cell 1	0.905374	17.3697
Cell 2	0.740817	11.7405
Cell 2_1	0.932184	17.0385
Cell 3	1.01514	8.33148
Cell 4	0.930637	13.3766
Cell 4_1	0.921026	18.2872
Cell 5	1.02682	15.3804
Cell 6	0.921466	10.7223
Cell 7	0.964917	15.7965
Cell 8	0.881389	12.9683
Cell 9	0.983556	14.2293
Cell 10	0.938062	11.6524
avg	0.930116	13.9078
SD	0.0736657	2.99995
