# Supplementary material for: Distinct states of nucleolar stress induced by anticancer drugs
Source: eLife journal article supplement (doi:10.7554/elife.88799), 2023-07-14
Supplement: fig1-data1 [file 1F.xlsx]

## Sheet: Normality DMSO
Nucleolin Intensity ratio average nucleolar/average nucleoplasm	UBF Intensity ratio average nucleolar/average nucleoplasm	Normality DMSO	Normality DMSO Norm
9.23433	6.21472	1.48588	1.16077
11.3646	10.1235	1.1226	0.876977
7.21045	5.54021	1.30148	1.01672
6.9088	5.01877	1.37659	1.0754
6.73237	5.35537	1.25712	0.982069
6.14203	4.77312	1.28679	1.00525
6.72096	5.34914	1.25646	0.981548
7.17475	5.91602	1.21277	0.947416
8.35025	6.71677	1.24319	0.971187
8.37094	6.16419	1.358	1.06087
7.5194	5.87868	1.2791	0.999234
8.6215	7.80759	1.10425	0.86264
1.26156	0.92715	1.36068	1.06297
8.27646	5.1979	1.59227	1.24389
8.22444	6.4502	1.27507	0.996086
6.2266	5.40596	1.1518	0.899791
5.51181	6.60797	0.834115	0.651613
6.05717	4.8093	1.25947	0.983902
7.18995	7.06961	1.01702	0.794501
6.7199	3.47717	1.93258	1.50974
6.57269	5.46275	1.20318	0.93993
7.42014	5.00981	1.48112	1.15706
6.74144	6.65441	1.01308	0.79142
8.34216	4.30742	1.93669	1.51295
4.50492	3.29531	1.36707	1.06796
7.65317	5.52706	1.38467	1.08171
4.04266	3.98829	1.01363	0.791853
7.35551	6.31199	1.16532	0.910354
6.68517	8.40775	0.795121	0.621151
6.58983	5.91319	1.11443	0.870595
0.970949	0.923236	1.05168	0.821575
8.79455	6.17096	1.42515	1.11333
5.96009	4.91607	1.21237	0.947105
7.0121	6.62204	1.0589	0.827218
8.67119	7.33156	1.18272	0.923945
8.89018	6.60881	1.3452	1.05088
7.7265	3.97584	1.94336	1.51816
6.23473	5.41292	1.15182	0.899808
7.91486	5.20323	1.52114	1.18832
8.47182	7.50267	1.12917	0.882114
	Avg	1.28008	1
	stdev	0.254569	0.19887
	SEM	0.040251	0.0314442

## Sheet: Normality CX
Nucleoloin Intensity ratio average nucleolar/average nucleoplasm	UBF Intensity ratio average nucleolar/average nucleoplasm	Normality CX	Normality CX Norm
2.73345	7.88111	0.346835	0.270949
2.78009	8.35431	0.332774	0.259964
2.67284	7.96198	0.3357	0.26225
2.78594	9.26525	0.300687	0.234898
3.15357	11.6901	0.269764	0.210741
8.0072	11.949	0.670114	0.523495
3.93749	9.26986	0.424763	0.331826
3.15353	10.0399	0.3141	0.245376
3.21127	8.76089	0.366545	0.286346
4.7874	12.9955	0.36839	0.287787
2.47536	8.51234	0.290797	0.227171
2.7672	7.73645	0.357684	0.279424
3.41838	8.09463	0.422302	0.329904
2.95463	9.0069	0.328041	0.256266
3.499	12.4351	0.281381	0.219816
3.27566	12.0227	0.272456	0.212843
3.45816	10.88	0.317845	0.248301
3.28915	9.42939	0.348819	0.272499
3.31536	8.73429	0.379579	0.296529
3.55395	11.836	0.300267	0.23457
2.68125	7.32347	0.366118	0.286012
3.17849	8.72815	0.364165	0.284487
2.73131	7.52647	0.362894	0.283494
2.55017	8.2801	0.307988	0.240601
3.9677	8.98744	0.441472	0.344879
3.79881	7.06208	0.537916	0.420222
1.95811	8.5513	0.228983	0.178883
2.98154	10.6711	0.279404	0.218271
2.55325	8.51298	0.299924	0.234302
3.84491	9.35778	0.410878	0.320979
2.87358	12.6463	0.227228	0.177511
2.36826	8.96591	0.264141	0.206347
3.94182	7.55694	0.521616	0.407488
2.61394	8.97176	0.291352	0.227605
2.1183	9.92106	0.213515	0.166799
3.56104	8.63273	0.412504	0.32225
3.03874	9.07132	0.334983	0.26169
3.00589	7.32473	0.410375	0.320586
3.0848	10.0922	0.305662	0.238784
3.23332	8.75611	0.369265	0.288471
3.33473	10.2849	0.324234	0.253293
3.18296	8.71534	0.365214	0.285306
2.5837	9.84318	0.262487	0.205056
4.35317	8.60879	0.505666	0.395028
	Avg	0.350837	0.274075
	stdev	0.0879311	0.068692
	SEM	0.0132561	0.0103557

## Sheet: Normality Campt. 
Intensity ratio average nucleolar/average nucleoplasm	Intensity ratio average nucleolar/average nucleoplasm	Normality Campt.	Normality Campt. Norm
3.61643	5.38079	0.6721	0.525047
4.1315	5.15169	0.80197	0.626501
3.55333	5.31521	0.668522	0.522251
4.57896	7.72603	0.592666	0.462992
3.76445	4.64559	0.810327	0.63303
3.73312	4.95291	0.753723	0.58881
3.99257	9.39511	0.424962	0.331982
4.64892	6.13261	0.758065	0.592203
3.62191	5.05991	0.715804	0.559189
4.70546	6.05265	0.777422	0.607324
5.42378	5.13842	1.05554	0.824588
5.18999	5.53195	0.938185	0.732913
5.84116	7.88129	0.741142	0.578983
6.03491	8.33145	0.724353	0.565867
4.79675	6.31932	0.75906	0.59298
3.08294	4.96196	0.621314	0.485372
4.62052	5.89527	0.783767	0.612281
4.50708	6.3531	0.70943	0.554209
2.84634	4.83587	0.588588	0.459807
3.12225	3.93357	0.793746	0.620076
6.47609	5.73631	1.12897	0.881951
4.18844	4.93502	0.848716	0.66302
3.21001	4.86103	0.660355	0.515872
4.0886	4.59859	0.889099	0.694567
3.80424	4.97697	0.764368	0.597127
3.63923	5.48921	0.662978	0.517921
5.25648	7.00295	0.750608	0.586377
4.42736	8.12942	0.54461	0.425451
4.56839	6.13251	0.744947	0.581955
4.46163	5.08123	0.878062	0.685945
5.99775	6.11642	0.9806	0.766047
5.27531	6.69021	0.788513	0.615989
5.82883	6.84916	0.851027	0.664825
3.78977	6.30471	0.601101	0.469582
4.61539	8.28182	0.557292	0.435358
3.89089	6.21022	0.626531	0.489448
4.91672	5.36731	0.916049	0.71562
4.12753	4.40875	0.936213	0.731372
4.71685	5.01275	0.940972	0.73509
5.61684	6.43388	0.873009	0.681997
	Avg	0.765867	0.598298
	stdev	0.144885	0.113185
	SEM	0.0229084	0.0178961
