# Supplementary material for: Distinct states of nucleolar stress induced by anticancer drugs
Source: eLife journal article supplement (doi:10.7554/elife.88799), 2023-07-14
Supplement: fig2-data1 [file 2D.xlsx]

## Sheet: Hits by target
Target	Count	Library	% TOTAL	% in the library	Enrichment, fold (% total/%library)	Probability of hit enrichment level	What it is
HSP90	13	16	0.8125	0.0135593	59.9219	2.68271e-08	heat shock prot.
mTOR, PI3K	22	64	0.34375	0.0542373	6.33789	8.50209e-06	mTor pathway
Topoisomerase	10	19	0.526316	0.0161017	32.687	4.07978e-05	topoisomerase
TOPK	2	2	1	0.00169492	590	0.00231429	PDZ binding kinase
DHFR	2	3	0.666667	0.00254237	262.222	0.00711479	antifolate						Total	Hits 1 and 10uM	Hits 10uM only
Pim	2	3	0.666667	0.00254237	262.222	0.00711479	S/T kinase						1180	83	69
CDK	8	28	0.285714	0.0237288	12.0408	0.0108068	CDKs
Microtubule	6	19	0.315789	0.0161017	19.6122	0.0120431	Microtubule poisons
Proteasome	2	5	0.4	0.00423729	94.4	0.0273784	Ub-dependent degradation
DNA-PK	3	9	0.333333	0.00762712	43.7037	0.0297743	DNA-dependent protein kinase
Src	4	14	0.285714	0.0118644	24.0816	0.0357023	TR non receptor
GSK-3	2	6	0.333333	0.00508475	65.5556	0.0431712	glycogen synthase kinase 3 a nad b
ALK	3	13	0.230769	0.0110169	20.9467	0.0883435	RTK
MEK	3	14	0.214286	0.0118644	18.0612	0.108099	Mitogen-activated protein kinase kinase kinase
IκB/IKK	2	9	0.222222	0.00762712	29.1358	0.111132	enzyme complex that is involved in propagating the cellular response to inflammation
STAT	2	9	0.222222	0.00762712	29.1358	0.111132	Signal transducer and activator of transcription
Bcr-Abl	4	26	0.153846	0.0220339	6.98225	0.245063	ABL 1 and 2 kinase
c-Met	3	20	0.15	0.0169492	8.85	0.258051	RTK
Raf	2	14	0.142857	0.0118644	12.0408	0.269968	S/T kinase
Aurora Kinase	3	21	0.142857	0.0177966	8.02721	0.286436	Aurora A/B
EGFR	5	35	0.142857	0.029661	4.81633	0.297229	EGF receptor
HDAC	3	28	0.107143	0.0237288	4.51531	0.487769	hist deacetyl.
Other	46
SUM	152						Target sorted	Count
							mTOR, PI3K	22
							HSP	13
							Topoisomerase	10
							CDK	8
							Microtubule Associated	6
							EGFR	5
							Src	4
							Bcr-Abl	4
							ALK	3
							DNA-PK	3
							MEK	3
							Aurora Kinase	3
							HDAC	3
							c-Met	3
							TOPK	2
							DHFR	2
							Pim	2
							Proteasome	2
							GSK-3	2
							IκB/IKK	2
							STAT	2
							Raf	2
							Other	46
