# Supplementary material for: Distinct states of nucleolar stress induced by anticancer drugs
Source: eLife journal article supplement (doi:10.7554/elife.88799), 2023-07-14
Supplement: fig2-data1 [file 2F.xlsx]

## Sheet: Summary 4 fields ea
	RAW										NORMALIZED
drug	BJ5TA	CHON-002	RPE1	DLD1	HCT116	BJ5TA	CHON-002	RPE1	DLD1	HCT116	BJ5TA	CHON-002	RPE1	DLD1	HCT116	BJ5TA	CHON-002	RPE1	DLD1	HCT116
17AAG	0.539405	0.853345	0.531258	0.548314	0.591448	0.527195	0.76821	0.506224	0.480733	0.567436	0.313349	0.453506	0.310165	0.496747	0.481965	0.306257	0.408261	0.295549	0.435522	0.462398
17AAG	0.532327	0.774363	0.514606	0.501317	0.587558	0.0105965	0.0665586	0.024077	0.0576514	0.0336485	0.309238	0.411531	0.300443	0.45417	0.478795	0.0061557	0.0353722	0.0140569	0.0522296	0.0274198
17AAG	0.520882	0.752875	0.505069	0.460037	0.572213						0.302589	0.400111	0.294875	0.416773	0.46629
17AAG	0.516168	0.692255	0.473963	0.413266	0.518524						0.299851	0.367895	0.276714	0.3744	0.42254
BIIB-21	0.611581	0.767158	0.593589	0.454005	0.553414	0.56833	0.669092	0.529891	0.414689	0.542919	0.355278	0.407702	0.346556	0.411308	0.450972	0.330153	0.355585	0.309367	0.375689	0.442419
BIIB-21	0.571824	0.652333	0.524523	0.432712	0.550656	0.0343042	0.0668822	0.0439553	0.0345859	0.0159754	0.332182	0.346679	0.306233	0.392017	0.448724	0.0199279	0.0355442	0.0256625	0.0313332	0.0130182
BIIB-21	0.561616	0.638845	0.502803	0.392111	0.548455						0.326252	0.33951	0.293552	0.355235	0.446931
BIIB-21	0.5283	0.618033	0.498647	0.379929	0.51915						0.306898	0.32845	0.291126	0.344198	0.42305
BMH21	0.157184	0.23832	0.146421	0.237967	0.267984	0.127	0.156033	0.123962	0.190869	0.24834	0.0913106	0.126654	0.0854852	0.215587	0.218377	0.0737764	0.0829228	0.0723731	0.172919	0.202369
BMH21	0.128527	0.145829	0.128051	0.211709	0.256252	0.0217502	0.0563637	0.0204498	0.0411048	0.0166225	0.0746632	0.0775002	0.0747602	0.191798	0.208818	0.012635	0.0299542	0.0119392	0.0372391	0.0135455
BMH21	0.112378	0.125342	0.124492	0.164269	0.235166						0.0652821	0.0666121	0.0726825	0.14882	0.191635
BMH21	0.109912	0.11464	0.0968848	0.149532	0.233956						0.0638495	0.0609249	0.0565644	0.135469	0.190648
Camptothecin	0.867814	0.778768	0.748719	0.516586	0.516845	0.813458	0.714525	0.707439	0.443929	0.499406	0.504128	0.413872	0.437126	0.468003	0.421172	0.472552	0.379731	0.413025	0.402179	0.406961
Camptothecin	0.826486	0.7594	0.724382	0.442383	0.512659	0.0512304	0.0892	0.041326	0.0540743	0.0182737	0.480119	0.403579	0.422917	0.400778	0.417761	0.0297606	0.0474049	0.0241274	0.0489888	0.0148911
Camptothecin	0.814973	0.7367	0.705135	0.430307	0.489114						0.473432	0.391515	0.41168	0.389838	0.398574
Camptothecin	0.744559	0.583234	0.651519	0.386439	0.479007						0.432527	0.309956	0.380377	0.350096	0.390338
Carfilzomib	0.611833	0.920431	1.07097	0.579698	0.785796	0.565165	0.852751	0.858401	0.481481	0.704831	0.355424	0.489158	0.625267	0.52518	0.640337	0.328314	0.45319	0.501161	0.4362	0.57436
Carfilzomib	0.598689	0.841632	0.838117	0.451267	0.746807	0.0467405	0.0466479	0.147357	0.0655439	0.0776102	0.347788	0.447281	0.489319	0.408827	0.608565	0.0271523	0.0247908	0.0860316	0.0593798	0.0632438
Carfilzomib	0.529363	0.835059	0.785241	0.450337	0.676496						0.307516	0.443787	0.458448	0.407985	0.55127
Carfilzomib	0.520775	0.813882	0.739272	0.444622	0.610227						0.302527	0.432533	0.43161	0.402807	0.497268
CX5461	0.201533	1.19989	0.567963	0.313805	0.80892	0.184388	0.916986	0.474233	0.247104	0.496264	0.117074	0.637677	0.331595	0.284293	0.659181	0.107114	0.487327	0.276872	0.223865	0.4044
CX5461	0.182233	0.94423	0.557815	0.247604	0.52626	0.0118429	0.2154	0.11229	0.0502074	0.232099	0.105862	0.501806	0.32567	0.224318	0.428844	0.00687975	0.114473	0.0655587	0.0454856	0.189135
CX5461	0.179111	0.833731	0.441864	0.234181	0.371036						0.104049	0.443082	0.257974	0.212157	0.302354
CX5461	0.174676	0.690091	0.32929	0.192826	0.278838						0.101472	0.366745	0.19225	0.174691	0.227222
Dinaciclib	0.43001	0.413798	0.472811	0.609286	0.567408	0.416539	0.377534	0.458884	0.487409	0.511075	0.2498	0.21991	0.276042	0.551985	0.462375	0.241975	0.200638	0.267911	0.441571	0.427578
Dinaciclib	0.429221	0.391679	0.465965	0.522108	0.556057	0.015579	0.0347927	0.0176329	0.0993524	0.0592168	0.249342	0.208156	0.272045	0.473006	0.453126	0.00905012	0.0184904	0.0102947	0.0900087	0.0524637
Dinaciclib	0.408142	0.372897	0.463678	0.434588	0.450655						0.237097	0.198174	0.27071	0.393717	0.367234
Dinaciclib	0.398782	0.331763	0.433083	0.383656	0.470179						0.231659	0.176314	0.252848	0.347575
DMSO	1.84966	1.99418	1.79005	1.15901	1.30768	1.72142	1.88166	1.71282	1.10381	1.22716	1.0745	1.0598	1.04508	1.05001	1.06562	1	1	1	1	1
DMSO	1.7421	1.9684	1.71374	1.09527	1.26993	0.120497	0.126026	0.0637526	0.0381345	0.0831133	1.01201	1.04609	1.00054	0.992262	1.03485	0.069999	0.0669759	0.0372207	0.0345481	0.0677282
DMSO	1.73526	1.84373	1.7136	1.08925	1.21455						1.00804	0.979843	1.00046	0.986808	0.989725
DMSO	1.55865	1.72034	1.6339	1.07171	1.11648						0.905445	0.914265	0.953924	0.970919	0.909805
Doxorubicin	0.271909	0.41516	0.239334	0.460516	0.367484	0.221203	0.343188	0.227322	0.396968	0.310766	0.157957	0.220635	0.13973	0.417206	0.299459	0.128501	0.182385	0.132718	0.359635	0.253241
Doxorubicin	0.223707	0.383919	0.238217	0.421943	0.314291	0.0427942	0.0727168	0.01846	0.0619366	0.0437599	0.129955	0.204032	0.139079	0.382261	0.256112	0.0248599	0.0386449	0.0107775	0.0561117	0.0356595
Doxorubicin	0.221994	0.323393	0.231632	0.39097	0.299368						0.12896	0.171866	0.135234	0.3542	0.243952
Doxorubicin	0.167203	0.250278	0.200105	0.314443	0.261924						0.097131	0.133009	0.116828	0.284871	0.213439
Flavopiridol	0.416261	0.362015	0.470232	0.589993	0.612351	0.347882	0.340598	0.434245	0.477102	0.554297	0.241813	0.192391	0.274536	0.534507	0.498999	0.202091	0.181009	0.253526	0.432232	0.451691
Flavopiridol	0.352905	0.355998	0.449553	0.46708	0.598969	0.0518995	0.024608	0.0319691	0.083685	0.0701617	0.205008	0.189193	0.262463	0.423153	0.488094	0.0301493	0.0130778	0.0186645	0.0758148	0.0571741
Flavopiridol	0.329699	0.337074	0.419106	0.463571	0.548352						0.191528	0.179136	0.244687	0.419974	0.446847
Flavopiridol	0.292663	0.307306	0.398087	0.387762	0.457515						0.170013	0.163316	0.232415	0.351295	0.372824
LY2857785	0.60529	0.513365	0.826917	0.634817	0.639517	0.54552	0.528164	0.791569	0.562343	0.621737	0.351623	0.272825	0.48278	0.575115	0.521136	0.316902	0.28069	0.462143	0.509457	0.506647
LY2857785	0.546605	0.523874	0.791682	0.558945	0.62735	0.0428252	0.029075	0.0264632	0.0507404	0.0191851	0.317532	0.27841	0.462209	0.506379	0.511222	0.0248779	0.0154518	0.0154501	0.0459685	0.0156338
LY2857785	0.521291	0.570239	0.784393	0.533887	0.625578						0.302827	0.30305	0.457953	0.483677	0.509778
LY2857785	0.508896	0.505177	0.763286	0.521724	0.594501						0.295626	0.268474	0.44563	0.472658	0.484453
Olalespib	0.536053	0.781177	0.514288	0.424931	0.561607	0.505767	0.720011	0.495141	0.401002	0.532973	0.311402	0.415152	0.300258	0.384968	0.457648	0.293808	0.382646	0.289079	0.36329	0.434314
Olalespib	0.530385	0.719377	0.500825	0.420862	0.556408	0.0320979	0.0439591	0.015928	0.0256044	0.0328312	0.308109	0.382309	0.292397	0.381282	0.453412	0.0186462	0.0233618	0.00929924	0.0231964	0.0267538
Olalespib	0.483807	0.700313	0.487919	0.383638	0.52289						0.281052	0.372177	0.284862	0.347559	0.426098
Olalespib	0.472823	0.679177	0.477534	0.374578	0.490986						0.274671	0.360945	0.278799	0.339351	0.4001
Oprozomib	0.87987	1.11248	1.02272	0.582783	0.889745	0.772174	1.031	0.941973	0.519941	0.807776	0.511131	0.591223	0.597095	0.527975	0.725045	0.448569	0.54792	0.549953	0.471043	0.658249
Oprozomib	0.760066	1.04837	0.951325	0.54403	0.797988	0.073844	0.0671984	0.0631637	0.0601804	0.0560871	0.441535	0.557152	0.555413	0.492866	0.650272	0.0428972	0.0357122	0.0368769	0.0545207	0.0457048
Oprozomib	0.729136	1.01091	0.922446	0.512232	0.77465						0.423567	0.537241	0.538553	0.464059	0.631254
Oprozomib	0.719623	0.952248	0.871401	0.440718	0.768723						0.418041	0.506067	0.508751	0.39927	0.626425
Sapanisertib	0.783891	0.80837	0.711612	0.491833	0.690084	0.719031	0.753231	0.693349	0.439301	0.673986	0.455375	0.429604	0.415461	0.445578	0.562343	0.417697	0.400301	0.404799	0.397986	0.549225
Sapanisertib	0.762584	0.757716	0.69504	0.435651	0.68844	0.0847688	0.0427006	0.0134192	0.0391119	0.0257178	0.442998	0.402684	0.405786	0.39468	0.561003	0.0492436	0.022693	0.00783454	0.0354336	0.0209572
Sapanisertib	0.734024	0.741199	0.684913	0.432489	0.681617						0.426407	0.393906	0.399874	0.391815	0.555443
Sapanisertib	0.595626	0.70564	0.681831	0.397231	0.635803						0.346009	0.375009	0.398074	0.359873	0.51811
Taselicib	0.630915	0.95468	0.659453	0.61235	0.777496	0.596593	0.836309	0.644373	0.535844	0.72152	0.366509	0.507359	0.38501	0.554761	0.633574	0.346571	0.444452	0.376205	0.485451	0.587959
Taselicib	0.58894	0.823879	0.648322	0.582473	0.749798	0.0230413	0.0823974	0.0144715	0.0733678	0.0638907	0.342125	0.437846	0.37851	0.527694	0.611003	0.0133851	0.0437897	0.00844889	0.0664679	0.0520639
Taselicib	0.583736	0.800515	0.644962	0.49071	0.728196						0.339102	0.425429	0.376549	0.444561	0.5934
Taselicib	0.58278	0.766161	0.624754	0.457844	0.630589						0.338547	0.407172	0.364751	0.414786	0.51386

## Sheet: Summary norm.
drug	DMSO	17AAG	Onalespib	BIIB-21	Dinaciclib	Flavopiridol	LY2857785	Carfilzomib	Oprozomib	Sapanisertib	Taselicib	Camptothecin	Doxorubicin	CX5461	BMH21
RPE1	1	0.295549	0.289079	0.309367	0.267911	0.253526	0.462143	0.501161	0.549953	0.404799	0.376205	0.413025	0.132718	0.276872	0.0723731
BJ5TA	1	0.306257	0.293808	0.330153	0.241975	0.202091	0.316902	0.328314	0.448569	0.417697	0.346571	0.472552	0.128501	0.107114	0.0737764
CHON-002	1	0.408261	0.382646	0.355585	0.200638	0.181009	0.28069	0.45319	0.54792	0.400301	0.444452	0.379731	0.182385	0.487327	0.0829228
DLD1	1	0.435522	0.36329	0.375689	0.441571	0.432232	0.509457	0.4362	0.471043	0.397986	0.485451	0.402179	0.359635	0.223865	0.172919
HCT116	1	0.462398	0.434314	0.442419	0.427578	0.451691	0.506647	0.57436	0.658249	0.549225	0.587959	0.406961	0.253241	0.4044	0.202369
Stdev
RPE1	0.0372207	0.0140569	0.00929924	0.0256625	0.0102947	0.0186645	0.0154501	0.0860316	0.0368769	0.00783454	0.00844889	0.0241274	0.0107775	0.0655587	0.0119392
BJ5TA	0.069999	0.0061557	0.0186462	0.0199279	0.00905012	0.0301493	0.0248779	0.0271523	0.0428972	0.0492436	0.0133851	0.0297606	0.0248599	0.00687975	0.012635
CHON-002	0.0669759	0.0353722	0.0233618	0.0355442	0.0184904	0.0130778	0.0154518	0.0247908	0.0357122	0.022693	0.0437897	0.0474049	0.0386449	0.114473	0.0299542
DLD1	0.0345481	0.0522296	0.0231964	0.0313332	0.0900087	0.0758148	0.0459685	0.0593798	0.0545207	0.0354336	0.0664679	0.0489888	0.0561117	0.0454856	0.0372391
HCT116	0.0677282	0.0274198	0.0267538	0.0130182	0.0524637	0.0571741	0.0156338	0.0632438	0.0457048	0.0209572	0.0520639	0.0148911	0.0356595	0.189135	0.0135455
