# Supplementary material for: Distinct states of nucleolar stress induced by anticancer drugs
Source: eLife journal article supplement (doi:10.7554/elife.88799), 2023-07-14
Supplement: fig2-figsupp1-data1 [file Fig.2 Supplement 1C.xlsx]

## Sheet: DMSO controls 4 fields
	4 fields avg raw					Avg and SD raw
drug	BJ5TA	CHON-002	RPE1	DLD1	HCT116	BJ5TA	CHON-002	RPE1	DLD1	HCT116
DMSO	1.84966	1.99418	1.79005	1.15901	1.30768	1.72142	1.88166	1.71282	1.10381	1.22716
DMSO	1.7421	1.9684	1.71374	1.09527	1.26993	0.120497	0.126026	0.0637526	0.0381345	0.0831133
DMSO	1.73526	1.84373	1.7136	1.08925	1.21455
DMSO	1.55865	1.72034	1.6339	1.07171	1.11648
	Avg	SD
RPE1	1.71282	0.0637526
BJ5TA	1.72142	0.120497
CHON-002	1.88166	0.126026
DLD1	1.10381	0.0381345
HCT116	1.22716	0.0831133
