# Supplementary material for: Distinct states of nucleolar stress induced by anticancer drugs
Source: eLife journal article supplement (doi:10.7554/elife.88799), 2023-07-14
Supplement: fig6-data1 [file 6A.xlsx]

## Sheet: NPM1 contr.
Time, sec	Avg whole	Avg partial	Avg nucleoplasm	Stdev whole	Stdev partial	Stdev Nucleoplasm
-1.5	1.00096	1.00083	0.99662	0.00294484	0.00187055	0.0037428
-1	0.999038	0.999557	1.00167	0.00166507	0.00106825	0.00321501
-0.5	1	0.999617	1.00171	0.0024273	0.0016773	0.00395438
0	0.0266694	0.0480245	0.0784123	0.011966	0.0167681	0.0492538
0.5	0.0413922	0.0661714	0.113264	0.0169323	0.0192578	0.0716922
1	0.05858	0.0879476	0.152292	0.0243481	0.0219934	0.0889911
1.5	0.0757834	0.108762	0.188459	0.0326613	0.0256604	0.10075
2	0.0919163	0.127855	0.222357	0.0404073	0.0291242	0.110138
2.5	0.107552	0.146672	0.254697	0.0473943	0.0332671	0.119375
3	0.123104	0.164684	0.285894	0.0547183	0.0380123	0.123703
3.5	0.136998	0.18213	0.31343	0.0612247	0.0414817	0.127503
4	0.147861	0.198055	0.334686	0.0686768	0.0456981	0.133473
4.5	0.162198	0.214966	0.359818	0.0735246	0.0491729	0.13637
5	0.176152	0.230399	0.384388	0.077639	0.0533911	0.140286
5.5	0.189496	0.244386	0.406222	0.081327	0.0584117	0.138411
6	0.203718	0.258794	0.428615	0.0831766	0.0614083	0.138062
6.5	0.215065	0.273399	0.447076	0.0868447	0.0636854	0.135452
7	0.227167	0.286565	0.467944	0.0893691	0.0663089	0.13514
7.5	0.239361	0.300828	0.48424	0.0926453	0.0668629	0.135541
8	0.250437	0.312932	0.500423	0.0947456	0.0702677	0.134231
8.5	0.259985	0.324787	0.518926	0.0975189	0.073272	0.130645
9	0.269794	0.335469	0.535165	0.0998889	0.0745658	0.134062
9.5	0.280655	0.346448	0.549244	0.101946	0.0774453	0.133192
10	0.290188	0.356819	0.561508	0.10249	0.0790098	0.130741
10.5	0.300671	0.366691	0.575264	0.105981	0.081019	0.130315
11	0.308859	0.377526	0.58916	0.106625	0.0835048	0.130958
11.5	0.317304	0.387394	0.599854	0.107271	0.0855654	0.128976
12	0.326852	0.394941	0.612025	0.109375	0.0867894	0.126955
12.5	0.334885	0.403305	0.620067	0.109811	0.0859687	0.122435
13	0.342722	0.411361	0.629902	0.111707	0.0875681	0.122428
13.5	0.351661	0.419608	0.639637	0.112411	0.0891561	0.11697
14	0.359042	0.430069	0.648868	0.113198	0.0928424	0.114811
14.5	0.366092	0.437821	0.657952	0.115163	0.094297	0.110754
15	0.373654	0.445207	0.669031	0.115193	0.0958634	0.111352
15.5	0.380722	0.451838	0.674865	0.116226	0.0973863	0.106467
16	0.387083	0.459017	0.679433	0.117585	0.0978967	0.105603
16.5	0.394885	0.46475	0.688794	0.119011	0.0982643	0.106975
17	0.400993	0.471978	0.700044	0.119273	0.100647	0.1058
17.5	0.408004	0.479231	0.705828	0.119448	0.100867	0.101576
18	0.414515	0.485433	0.714933	0.119603	0.101416	0.10275
18.5	0.420153	0.492084	0.72111	0.120254	0.10206	0.101088
19	0.425629	0.498513	0.728755	0.12041	0.10365	0.0998359
19.5	0.431576	0.505244	0.734484	0.120635	0.104143	0.0971919
20	0.437669	0.509914	0.738756	0.121487	0.104843	0.0981592
20.5	0.443604	0.515127	0.746098	0.121124	0.105388	0.095062
21	0.449467	0.522438	0.751317	0.121435	0.106254	0.0937046
21.5	0.454239	0.527398	0.755555	0.120609	0.106408	0.0975314
22	0.460074	0.5331	0.762197	0.122487	0.107738	0.0928231
22.5	0.465584	0.538299	0.764553	0.122574	0.107731	0.0923105
23	0.471385	0.544625	0.771756	0.122279	0.108248	0.0872714
23.5	0.476326	0.54918	0.774244	0.121343	0.108895	0.0897147
24	0.480675	0.553513	0.775418	0.120747	0.109493	0.0877171
24.5	0.486131	0.558643	0.780631	0.121504	0.109522	0.0867761
25	0.490733	0.563798	0.791658	0.122634	0.110546	0.0879057
25.5	0.494363	0.568189	0.795728	0.122076	0.110361	0.0893531
26	0.501987	0.573264	0.802216	0.121733	0.111934	0.0861953
26.5	0.506545	0.578544	0.80516	0.121437	0.111961	0.0883182
27	0.510883	0.582509	0.811483	0.122965	0.112194	0.0824422
27.5	0.514554	0.586606	0.816123	0.121462	0.112685	0.0817849
28	0.51881	0.591281	0.817768	0.121972	0.114347	0.0811819
28.5	0.523029	0.595216	0.823808	0.121284	0.114023	0.0815498
29	0.526547	0.599539	0.827125	0.120368	0.113333	0.0820594
29.5	0.530873	0.603988	0.830776	0.120375	0.113473	0.0819761
30	0.535238	0.607134	0.833569	0.12016	0.11361	0.0809695
30.5	0.54002	0.610377	0.834139	0.122466	0.113061	0.0794227
31	0.544004	0.614887	0.839072	0.121693	0.114868	0.0745538
31.5	0.547624	0.618293	0.845588	0.12077	0.114378	0.077541
32	0.551381	0.621527	0.848436	0.120555	0.113294	0.0781186
32.5	0.554747	0.625622	0.851397	0.119284	0.113898	0.0757026
33	0.558169	0.629796	0.851387	0.119595	0.116307	0.0696144
33.5	0.560331	0.632262	0.855262	0.118421	0.114748	0.0695558
34	0.564578	0.635813	0.857705	0.118504	0.11433	0.0646007
34.5	0.56888	0.638172	0.857887	0.118969	0.112728	0.0653592
35	0.572053	0.64294	0.860079	0.118306	0.112674	0.0628824
35.5	0.576497	0.645978	0.864646	0.117153	0.113038	0.0632791
36	0.581157	0.649146	0.869604	0.118634	0.113558	0.0593672
36.5	0.584362	0.65231	0.869915	0.119426	0.112518	0.0621206
37	0.586196	0.655308	0.872667	0.119078	0.112985	0.0650552
37.5	0.590102	0.659438	0.872363	0.119168	0.114402	0.0604792
38	0.593566	0.662751	0.877778	0.118769	0.114457	0.0589566
38.5	0.595804	0.664025	0.878051	0.118784	0.113286	0.0596091
39	0.598575	0.666254	0.878437	0.116892	0.114514	0.0593974
39.5	0.601748	0.670208	0.877872	0.116893	0.115886	0.0594733
40	0.60474	0.67311	0.886496	0.117186	0.114111	0.0582139
40.5	0.607854	0.677937	0.885736	0.117449	0.115441	0.0523975
41	0.611201	0.679666	0.890124	0.118195	0.115437	0.0546442
41.5	0.614945	0.680951	0.892702	0.117862	0.114078	0.0589288
42	0.618224	0.683555	0.8923	0.118613	0.114382	0.0565793
42.5	0.621436	0.687176	0.89475	0.118419	0.113915	0.0524205
43	0.622462	0.690175	0.899173	0.115959	0.113215	0.0534695
43.5	0.624244	0.692299	0.902432	0.115634	0.111419	0.0547388
44	0.628503	0.695191	0.905175	0.1156	0.111752	0.0546968
44.5	0.630515	0.696507	0.907002	0.115391	0.111794	0.0519805
45	0.633718	0.700763	0.906598	0.115202	0.114752	0.0514652
45.5	0.637653	0.700793	0.908847	0.115771	0.111686	0.0506249
46	0.639855	0.703128	0.909171	0.115262	0.112196	0.0488975
46.5	0.642522	0.704718	0.909276	0.114609	0.110654	0.0507663
47	0.643588	0.707456	0.911602	0.113043	0.111159	0.0509276
47.5	0.64482	0.710038	0.914128	0.11409	0.112763	0.050935
48	0.648169	0.711332	0.911315	0.112795	0.11212	0.0503108
48.5	0.649799	0.713805	0.915974	0.11357	0.112786	0.051385
49	0.652755	0.716163	0.914637	0.113277	0.111867	0.0502059
49.5	0.654356	0.719609	0.912421	0.113115	0.111763	0.0497509
50	0.657472	0.721352	0.917021	0.113511	0.112381	0.052537
50.5	0.659485	0.724198	0.91937	0.113603	0.113705	0.0519808
51	0.661673	0.726041	0.91922	0.112174	0.112318	0.0493354
51.5	0.664133	0.727385	0.91832	0.113435	0.111642	0.047579
52	0.666792	0.728302	0.920815	0.113104	0.110886	0.0479462
52.5	0.669771	0.731152	0.922965	0.113803	0.111282	0.0498034
53	0.67198	0.734002	0.925766	0.112714	0.110217	0.0497754
53.5	0.674466	0.736689	0.923709	0.111859	0.111126	0.0518497
54	0.676757	0.737297	0.924345	0.112006	0.110214	0.0528971
54.5	0.679025	0.740533	0.925524	0.111643	0.110384	0.0507094
55	0.680007	0.741484	0.927204	0.113131	0.111386	0.0443977
55.5	0.681647	0.742547	0.930613	0.110713	0.111284	0.0463299
56	0.683333	0.744906	0.929905	0.110492	0.110248	0.0456223
56.5	0.684093	0.746953	0.927828	0.109436	0.109066	0.0451096
57	0.687259	0.748374	0.929896	0.109753	0.109492	0.0445268
57.5	0.690281	0.750405	0.930397	0.110076	0.109463	0.0468036
58	0.691583	0.749905	0.932995	0.108831	0.108283	0.0467745
58.5	0.693698	0.749196	0.936655	0.106911	0.106877	0.0463576
59	0.693052	0.750028	0.935957	0.106105	0.106999	0.0455165
59.5	0.695703	0.752537	0.936193	0.106223	0.106986	0.0474717
60	0.697278	0.755189	0.936362	0.10457	0.105633	0.0445614
60.5	0.697895	0.757836	0.935605	0.10472	0.106056	0.0462361
61	0.702552	0.758212	0.937488	0.106354	0.106261	0.0519277
61.5	0.703614	0.760207	0.939226	0.105729	0.106747	0.0484286
62	0.704202	0.758587	0.938724	0.105063	0.104908	0.0481949
62.5	0.705006	0.759355	0.941096	0.105163	0.103777	0.049086
63	0.705822	0.761199	0.943089	0.104894	0.102315	0.0443663
63.5	0.706759	0.76418	0.949964	0.105732	0.103906	0.0463433
64	0.708797	0.764537	0.948028	0.104937	0.103017	0.0452939
64.5	0.7111	0.765382	0.946263	0.103757	0.102922	0.0474029
65	0.712025	0.765391	0.949257	0.103017	0.100856	0.0467054
65.5	0.712878	0.768092	0.947647	0.102607	0.100675	0.0504269
66	0.715289	0.768326	0.951199	0.104684	0.100849	0.0460479
66.5	0.716443	0.769225	0.951388	0.103794	0.100201	0.0474138
67	0.719518	0.770251	0.954243	0.103475	0.10186	0.0451349
67.5	0.720812	0.772806	0.956458	0.105033	0.100774	0.0429334
68	0.722282	0.77379	0.95729	0.104512	0.101473	0.0427991
68.5	0.722691	0.775875	0.957699	0.103928	0.100826	0.0439407
69	0.725504	0.776803	0.956459	0.10292	0.100138	0.0450625
69.5	0.727863	0.779114	0.957233	0.1038	0.101786	0.0440057
70	0.728221	0.779386	0.954887	0.102898	0.0999226	0.0442137
70.5	0.729709	0.78047	0.960843	0.101017	0.100196	0.0418302
71	0.730239	0.780998	0.957659	0.101463	0.0994813	0.0449725
71.5	0.732205	0.78313	0.958403	0.101203	0.0988387	0.0474391
72	0.733993	0.785592	0.963163	0.10061	0.0980032	0.046076
72.5	0.735707	0.785108	0.963417	0.100837	0.0982698	0.0452712
73	0.737932	0.787666	0.966244	0.101178	0.0978932	0.0449091
73.5	0.737762	0.789123	0.968685	0.101686	0.0964796	0.0490481
74	0.739522	0.789844	0.962251	0.101077	0.0958066	0.0510264
74.5	0.738977	0.790882	0.965272	0.0992917	0.0948899	0.0526116
75	0.741171	0.7901	0.966084	0.0999518	0.0954857	0.0485443
75.5	0.743091	0.791708	0.964845	0.0998267	0.0967672	0.0467249
76	0.74506	0.794261	0.963344	0.100103	0.0981091	0.0453277
76.5	0.746344	0.794378	0.963872	0.100472	0.0964288	0.0442611
77	0.74607	0.796371	0.96748	0.0993816	0.0974016	0.0452008
77.5	0.745985	0.79719	0.967143	0.0985371	0.0976893	0.0461154
78	0.748857	0.797548	0.968475	0.097839	0.0968048	0.0420157
78.5	0.751616	0.797842	0.970379	0.0960905	0.0971423	0.0443122
79	0.752578	0.800523	0.973179	0.0971543	0.0975525	0.0462084
79.5	0.753894	0.80138	0.973246	0.0964219	0.0962907	0.0509571
80	0.755893	0.80358	0.975449	0.0951663	0.095561	0.0469417
80.5	0.755987	0.803911	0.973106	0.0950783	0.096132	0.0477504
81	0.760049	0.805901	0.973393	0.0955846	0.0976142	0.0464938
81.5	0.760054	0.807324	0.969121	0.0958209	0.0974947	0.0414293
82	0.759462	0.809138	0.970637	0.0953645	0.0956136	0.0422746
82.5	0.761617	0.810024	0.973655	0.0944948	0.0954981	0.0423225
83	0.762698	0.809558	0.971762	0.0950879	0.0954294	0.042766
83.5	0.763084	0.810616	0.971577	0.0942479	0.0954785	0.0424448
84	0.763285	0.810419	0.97374	0.0943601	0.0964541	0.038895
84.5	0.764227	0.810156	0.970669	0.0939385	0.0950025	0.0405466
85	0.765001	0.80986	0.969836	0.09463	0.0948048	0.0415099
85.5	0.767277	0.811116	0.971201	0.0951214	0.0928367	0.0431439
86	0.769109	0.815227	0.977892	0.0950564	0.0956286	0.042187
86.5	0.76861	0.819271	0.975561	0.0924215	0.0973212	0.0478921
87	0.770643	0.819993	0.976494	0.0913725	0.0979739	0.0497448
87.5	0.771216	0.821083	0.975471	0.0902397	0.0968868	0.047119
88	0.770365	0.821695	0.982357	0.0898712	0.0950905	0.0448988
88.5	0.772516	0.821662	0.978604	0.0883456	0.0962973	0.0421207
89	0.77244	0.822796	0.975691	0.0898685	0.0967695	0.0440404
89.5	0.774208	0.825095	0.976921	0.088076	0.0984449	0.045375
90	0.775756	0.825448	0.977852	0.0879496	0.0973108	0.0467202
90.5	0.777378	0.826243	0.979915	0.0884282	0.0959012	0.0497276
91	0.777385	0.827391	0.981959	0.0877724	0.0964122	0.049859
91.5	0.777898	0.828252	0.982778	0.0870665	0.0956818	0.0500976
92	0.779363	0.829707	0.97996	0.0894008	0.0957468	0.0535354
92.5	0.77939	0.828407	0.98161	0.0889569	0.0959783	0.0486574
93	0.779725	0.828921	0.983767	0.0882601	0.0948545	0.0467707
93.5	0.781954	0.829748	0.979825	0.088747	0.0942152	0.0475161
94	0.782435	0.833175	0.983039	0.0885839	0.0946416	0.0485963
94.5	0.785185	0.832935	0.983658	0.0900554	0.0957682	0.04988
95	0.785231	0.832563	0.98371	0.0894131	0.0961789	0.0493785
95.5	0.786297	0.832056	0.988155	0.0877762	0.0937901	0.0460148
96	0.787241	0.833713	0.984801	0.0888929	0.0956922	0.0459031
96.5	0.787835	0.833622	0.983758	0.0887645	0.0951421	0.0492059
97	0.789209	0.834885	0.982174	0.0878598	0.096367	0.04684
97.5	0.788716	0.835772	0.984575	0.0884016	0.0968708	0.0456938
98	0.789609	0.836838	0.983249	0.0886622	0.0969021	0.0432172
98.5	0.79265	0.838222	0.983456	0.0885043	0.0971506	0.0478403
99	0.793493	0.838026	0.980897	0.0880149	0.0961314	0.0520741
99.5	0.793963	0.83977	0.983265	0.0866183	0.0974734	0.0506884
100	0.79272	0.837526	0.982915	0.0846477	0.0933702	0.0527968
100.5	0.793247	0.839455	0.984873	0.08464	0.0925634	0.0524462
101	0.794297	0.838593	0.982878	0.084693	0.092128	0.0498205
101.5	0.794759	0.840662	0.98665	0.0852707	0.0935333	0.0476378
102	0.795587	0.843527	0.988473	0.0827161	0.0939858	0.0476104
102.5	0.795825	0.843396	0.986914	0.083414	0.0937146	0.0475099
103	0.795916	0.844502	0.987602	0.0828449	0.0926636	0.0455326
103.5	0.797373	0.845022	0.98693	0.0818248	0.0938962	0.0447488
104	0.799139	0.845903	0.991059	0.0824398	0.0941543	0.0486949
104.5	0.799915	0.847886	0.988096	0.0815635	0.0954768	0.0495348
105	0.800404	0.84875	0.989971	0.0813198	0.095348	0.0472537
105.5	0.801321	0.848934	0.989614	0.0815116	0.0942695	0.0485559
106	0.803651	0.848472	0.989239	0.0827862	0.0931698	0.0518579
106.5	0.803438	0.848394	0.990679	0.0836738	0.0928444	0.0518305
107	0.805083	0.849092	0.988805	0.0826661	0.0899164	0.0507142
107.5	0.805605	0.84997	0.988563	0.0836852	0.090883	0.0528779
108	0.807136	0.849719	0.990542	0.0832304	0.0898384	0.0494086
108.5	0.806025	0.850925	0.99019	0.0819545	0.0905345	0.0460559
109	0.80692	0.853891	0.988282	0.0813878	0.0906922	0.0432132
109.5	0.805327	0.853807	0.991395	0.0813102	0.0942868	0.0443605
110	0.806315	0.853259	0.988405	0.0813413	0.0932145	0.045275
110.5	0.805014	0.854605	0.987327	0.0769377	0.0944376	0.0444993
111	0.807992	0.853346	0.988614	0.0787976	0.091929	0.0419003
111.5	0.809339	0.855187	0.990725	0.0779465	0.0949542	0.0422669
112	0.807951	0.855099	0.990994	0.0777735	0.0921931	0.0467664
112.5	0.807931	0.855417	0.991236	0.0777222	0.0907063	0.0498847
113	0.809098	0.855946	0.990337	0.076554	0.0922483	0.0458518
113.5	0.807193	0.8561	0.986511	0.0758633	0.0914371	0.0450734
114	0.80874	0.855398	0.989628	0.0763964	0.0915192	0.0463925
114.5	0.808016	0.8561	0.987179	0.0739122	0.0923778	0.0475606
115	0.80881	0.85624	0.983786	0.0748759	0.0921878	0.0502967
115.5	0.811806	0.856003	0.984245	0.0754258	0.0890048	0.0476644
116	0.811125	0.857092	0.983741	0.0720562	0.0901147	0.0492636
116.5	0.812823	0.857067	0.988616	0.0744514	0.0877985	0.0490284
117	0.814195	0.858612	0.992523	0.0743703	0.0897655	0.0458006
117.5	0.815913	0.858946	0.993557	0.0733035	0.0891423	0.0457504
118	0.81643	0.859513	0.99518	0.0740282	0.0886127	0.0463794
118.5	0.819145	0.858532	0.992539	0.0748449	0.0856581	0.0428238
119	0.817385	0.861153	0.993104	0.0717181	0.0863239	0.0413916
119.5	0.816436	0.8614	0.992904	0.0727789	0.087031	0.0489911
120	0.818832	0.860816	0.990633	0.073302	0.0863908	0.0487987
120.5	0.818284	0.861671	0.991104	0.072467	0.0869231	0.0485037
121	0.818187	0.862828	0.990723	0.072235	0.0870852	0.0495739
121.5	0.818215	0.863791	0.991532	0.0719862	0.0863601	0.0453657
122	0.819821	0.865432	0.993515	0.0731509	0.0867594	0.0422094
122.5	0.821031	0.864226	0.995647	0.0715988	0.0859823	0.0449615
123	0.819624	0.864231	0.994884	0.069629	0.087021	0.0396261
123.5	0.8224	0.865405	0.994171	0.0697238	0.0862221	0.0441086
124	0.823364	0.864659	0.993374	0.070273	0.084815	0.0423653
124.5	0.823221	0.866537	0.99707	0.0706004	0.0852589	0.0437922
125	0.824378	0.866494	0.993973	0.0700279	0.0859525	0.0432418
125.5	0.822243	0.86806	0.993335	0.0674286	0.0860416	0.0431485
126	0.822713	0.8681	0.996619	0.0678695	0.0860934	0.0450704
126.5	0.824092	0.867473	0.990168	0.0683769	0.0875396	0.0446012
127	0.827167	0.867511	0.991381	0.0689749	0.0865559	0.0454197
127.5	0.826583	0.866905	0.988755	0.0667948	0.0842138	0.0505864
128	0.826513	0.867658	0.991739	0.0678909	0.0841249	0.050494
128.5	0.826106	0.86689	0.990657	0.0680158	0.0844414	0.0513456
129	0.827091	0.867589	0.991244	0.0675799	0.0822535	0.0500005
129.5	0.82684	0.868306	0.996456	0.0690572	0.08193	0.0488074
130	0.828857	0.868924	0.990444	0.0688815	0.0825371	0.0529662
130.5	0.829416	0.868701	0.990935	0.0704408	0.0813519	0.0530213
131	0.830031	0.86879	0.987016	0.0681165	0.0800013	0.0536017
131.5	0.831678	0.871019	0.988185	0.0702814	0.0797176	0.0521036
132	0.831767	0.870471	0.990705	0.068227	0.0796206	0.0533913
132.5	0.830759	0.870285	0.993437	0.067325	0.0804445	0.0507543
133	0.831748	0.870211	0.992723	0.0676277	0.0824637	0.0516383
133.5	0.832903	0.870478	0.993209	0.0671991	0.0814158	0.0534974
134	0.833743	0.870456	0.994603	0.067848	0.0807807	0.0540268
134.5	0.834695	0.871847	0.992243	0.0683128	0.0801328	0.0541556
135	0.834944	0.872941	0.989946	0.0673728	0.0776929	0.0548076
135.5	0.831961	0.871522	0.992617	0.0678216	0.0774402	0.053325
136	0.832418	0.872562	0.993596	0.067192	0.0803116	0.0549658
136.5	0.833604	0.871321	0.993361	0.0682214	0.0778096	0.0507599
137	0.836188	0.872935	0.993827	0.0688118	0.0801178	0.0533954
137.5	0.837149	0.872211	0.993926	0.0694556	0.0765671	0.0518324
138	0.836188	0.872759	0.992572	0.0688405	0.077988	0.05501
138.5	0.837041	0.874623	0.989952	0.0689119	0.0782073	0.0609813
139	0.838399	0.874806	0.988297	0.0683699	0.0795407	0.0587759
139.5	0.83844	0.875069	0.989064	0.0671406	0.07814	0.0567758
140	0.840191	0.876091	0.992112	0.0671953	0.0778517	0.0591892
140.5	0.840725	0.87577	0.991324	0.0665407	0.0785458	0.0564844
141	0.84039	0.876359	0.989256	0.0668297	0.0789247	0.0568057
141.5	0.841046	0.875125	0.991469	0.0696863	0.0783653	0.0533834
142	0.84173	0.878125	0.990412	0.0710203	0.0789599	0.0521144
142.5	0.841121	0.879379	0.993963	0.0709751	0.0771623	0.0532813
143	0.841356	0.878679	0.994993	0.0701966	0.0772532	0.0567705
143.5	0.84233	0.879912	0.997544	0.0699728	0.0770914	0.0526781
144	0.842261	0.879208	0.995548	0.0694527	0.0772703	0.0491039
144.5	0.838766	0.879689	0.990354	0.0678204	0.0742259	0.0507077
145	0.840112	0.878888	0.993077	0.0686279	0.0739681	0.0530463
145.5	0.842656	0.877802	0.994046	0.0673971	0.0770191	0.0518511
146	0.840657	0.880907	0.991593	0.0662471	0.0786582	0.0564379
146.5	0.841651	0.883132	0.990967	0.0669332	0.0788711	0.0572847
147	0.842642	0.882814	0.990625	0.0664582	0.0791039	0.0564636
147.5	0.843044	0.882378	0.990248	0.0646731	0.0783228	0.0510323
148	0.843275	0.884044	0.987626	0.0653381	0.0781512	0.054048
148.5	0.84383	0.883112	0.991461	0.0658128	0.0796398	0.0502633
149	0.846027	0.8827	0.996174	0.0677243	0.0777923	0.0504792
149.5	0.847745	0.883049	0.996799	0.0671576	0.0786594	0.0506156
150	0.847804	0.884659	0.995843	0.0674922	0.0822256	0.0482419
150.5	0.849081	0.883007	0.996863	0.0694405	0.0806353	0.0466718
151	0.850581	0.882775	0.992208	0.0722597	0.0793125	0.0474636
151.5	0.849431	0.885697	0.992032	0.0710741	0.0817901	0.053126
152	0.850443	0.884179	0.994842	0.0695717	0.0822232	0.0526499
152.5	0.851396	0.884176	0.998329	0.0696938	0.0818417	0.0538859
153	0.851508	0.884183	0.994115	0.0704113	0.0794286	0.0522357
153.5	0.852549	0.885191	0.995463	0.0703326	0.0791102	0.0571725
154	0.854636	0.885276	0.99443	0.0698095	0.0791432	0.0625464
154.5	0.853094	0.88541	0.99469	0.0691522	0.0794876	0.0577288
155	0.853262	0.884692	0.996766	0.0691589	0.0798352	0.055468
155.5	0.855187	0.884487	0.995517	0.069181	0.0792576	0.059101
156	0.854539	0.886697	0.99433	0.0707425	0.0788383	0.055687
156.5	0.853733	0.88474	0.996875	0.0704284	0.0795055	0.0574152
157	0.854266	0.885431	0.997907	0.0711645	0.0785083	0.055735
157.5	0.852417	0.884475	0.99712	0.0711915	0.0770195	0.0549299
158	0.851849	0.884442	0.998634	0.0721521	0.0787819	0.0520418
