# Supplementary material for: Distinct states of nucleolar stress induced by anticancer drugs
Source: eLife journal article supplement (doi:10.7554/elife.88799), 2023-07-14
Supplement: fig6-data1 [file 6C.xlsx]

## Sheet: Sheet 1
	Mean(partial)	Mean(Whole nucleolus in question)	Mean(Unbleached half)	Mean(Unbleached whole)	Mean(nucleus)	mean all nucleoli	Mean(partial) norm. no nucleus	Mean(Whole nucleolus in question) norm. to nucleus	Mean(Unbleached half)norm. to nucleus	Mean(Unbleached whole) norm. to nucleus	Mean(partial) norm. to pre-FRAP	Mean(Whole nucleolus in question) norm. to pre-FRAP	Mean(Unbleached half) norm. to pre-FRAP	Mean(Inbleached whole) norm. to pre-FRAP	Time, sec
1	1220.83	1319.95	1479.34	1192.65	447.371	1303.19	2.72889	2.95047	3.30674	2.66591	1.00131	0.999713	0.99915	0.998467	-1.5
2	1205.56	1306.73	1466.14	1182	442.821	1290.11	2.72246	2.95093	3.3109	2.66925	0.998953	0.999869	1.00041	0.999719	-1
3	1205.86	1306.75	1465.4	1183.84	442.584	1290.46	2.72458	2.95255	3.31102	2.67484	0.999733	1.00042	1.00044	1.00181	-0.5
4	21.745	634.072	1098.73	1052.73	225.821	701.821	0.0962931	2.80785	4.8655	4.66181	0.0353329	0.951391	1.47014	1.746	0
5	34.574	645.262	1108.23	1052.51	229.468	710.143	0.15067	2.81199	4.82956	4.58672	0.0552855	0.952793	1.45928	1.71787	0.5
6	47.515	651.124	1108.27	1055.85	231.223	715.69	0.205494	2.816	4.79308	4.56638	0.0754021	0.954151	1.44826	1.71025	1
7	59.665	653.173	1105.53	1050.35	231.59	717.179	0.257632	2.82039	4.77365	4.53539	0.0945331	0.955637	1.44238	1.69865	1.5
8	70.49	652.711	1099.94	1034.64	230.247	714.447	0.306149	2.83483	4.77723	4.49363	0.112336	0.960531	1.44347	1.68301	2
9	81.685	658.272	1099.48	1031.54	231.487	717.743	0.352871	2.84367	4.74963	4.45614	0.129479	0.963526	1.43513	1.66897	2.5
10	88.765	651.971	1084.67	1032.08	228.799	714.371	0.387961	2.84954	4.74071	4.51085	0.142355	0.965514	1.43243	1.68946	3
11	96.332	640.15	1057.77	1031.78	224.141	706.507	0.429783	2.85601	4.71922	4.60324	0.157701	0.96771	1.42594	1.72406	3.5
12	113.084	702.633	1153.18	1130.61	247.956	774.876	0.456065	2.8337	4.65075	4.55971	0.167344	0.960149	1.40525	1.70776	4
13	128.348	745.076	1214.1	1195.56	264.432	820.77	0.485372	2.81765	4.59134	4.52123	0.178098	0.954709	1.3873	1.69335	4.5
14	139.481	762.959	1237.64	1233.58	272.262	843.415	0.512304	2.8023	4.54576	4.53086	0.18798	0.949508	1.37353	1.69695	5
15	152.83	819.889	1320.21	1281.18	292.619	893.527	0.522283	2.8019	4.51171	4.37831	0.191642	0.949374	1.36324	1.63982	5.5
16	169.692	854.929	1368.3	1319.29	305.11	928.054	0.556167	2.80204	4.48463	4.32399	0.204075	0.94942	1.35505	1.61947	6
17	175.502	801.288	1276.62	1279.05	287.762	883.114	0.609886	2.78455	4.43638	4.4448	0.223786	0.943495	1.34048	1.66472	6.5
18	168.496	730.694	1165.59	1130.89	259.307	798.918	0.649793	2.81787	4.49503	4.3612	0.238429	0.954786	1.3582	1.63341	7
19	149.492	592.546	939.49	896.531	204.269	644.515	0.731839	2.90081	4.59928	4.38897	0.268534	0.982888	1.3897	1.64381	7.5
20	156.072	594.336	938.308	900.451	204.685	647.292	0.762498	2.90366	4.58416	4.3992	0.279784	0.983854	1.38513	1.64764	8
21	160.787	590.195	927.519	888.005	202.717	641.627	0.79316	2.91142	4.57544	4.38052	0.291035	0.986484	1.38249	1.64064	8.5
22	165.878	591.58	925.667	887.967	203.161	642.773	0.816485	2.91188	4.55632	4.37076	0.299593	0.986638	1.37672	1.63699	9
23	170.704	592.165	923.021	883.452	203.196	642.335	0.840095	2.91426	4.54252	4.34778	0.308257	0.987443	1.37255	1.62838	9.5
24	175.784	592.899	920.906	880.833	203.566	642.606	0.863523	2.91256	4.52387	4.32701	0.316853	0.98687	1.36691	1.6206	10
25	181.247	594.482	920.91	880.903	203.797	644.386	0.889351	2.91703	4.51876	4.32245	0.32633	0.988384	1.36537	1.6189	10.5
26	184.218	594.659	918.763	888.151	203.798	646.448	0.903924	2.91788	4.5082	4.358	0.331678	0.988673	1.36218	1.63221	11
27	188.25	591.86	910.322	875.686	202.689	641.529	0.928763	2.92004	4.49123	4.32034	0.340791	0.989403	1.35705	1.61811	11.5
28	191.162	587.17	900.046	863.442	200.933	635.455	0.951372	2.92222	4.47933	4.29716	0.349087	0.990141	1.35346	1.60942	12
29	196.164	589.775	901.439	862.803	201.622	637.545	0.97293	2.92515	4.47094	4.27931	0.356998	0.991136	1.35092	1.60274	12.5
30	200.448	590.704	900.722	868.696	201.784	640.142	0.993379	2.92741	4.46379	4.30508	0.364501	0.9919	1.34876	1.61239	13
31	205.074	592.738	900.987	860.533	202.393	639.833	1.01325	2.92865	4.45167	4.25179	0.371791	0.99232	1.3451	1.59243	13.5
32	210.13	592.228	898.732	858.923	201.784	640.003	1.04136	2.93496	4.45393	4.25665	0.382107	0.994459	1.34578	1.59425	14
33	214.49	595.1	899.939	853.936	202.595	640.866	1.05871	2.93739	4.44206	4.21499	0.388474	0.995281	1.34219	1.57865	14.5
34	218.715	595.784	897.901	846.659	202.758	639.765	1.0787	2.9384	4.42844	4.17571	0.395808	0.995624	1.33808	1.56394	15
35	222.606	597.181	897.035	841.655	203.081	639.619	1.09614	2.9406	4.41713	4.14443	0.402209	0.996372	1.33466	1.55222	15.5
36	226.518	598.037	895.259	837.901	203.33	639.429	1.11404	2.94121	4.40299	4.12089	0.408776	0.996578	1.33039	1.5434	16
37	228.623	597.55	892.36	833.757	203.15	638.072	1.12539	2.94142	4.39262	4.10414	0.41294	0.996649	1.32725	1.53713	16.5
38	231.478	596.974	890.348	835.13	202.909	638.482	1.1408	2.94208	4.38792	4.11579	0.418593	0.99687	1.32583	1.54149	17
39	236.731	597.28	887.289	834.043	203.043	638.836	1.16592	2.94164	4.36996	4.10772	0.42781	0.996723	1.32041	1.53847	17.5
40	240.297	597.117	883.472	834.325	202.697	638.803	1.1855	2.94586	4.35858	4.11612	0.434996	0.998152	1.31697	1.54162	18
41	243.406	596.694	881.399	829.46	202.514	637.74	1.20192	2.94643	4.35229	4.09582	0.441022	0.998346	1.31507	1.53401	18.5
42	245.098	595.275	876.893	825.094	202.018	635.59	1.21325	2.94664	4.34067	4.08426	0.445178	0.998418	1.31156	1.52968	19
43	246.83	592.425	869.728	820.877	201.114	632.465	1.22731	2.94572	4.32455	4.08165	0.450339	0.998104	1.30669	1.52871	19.5
44	249.081	591.135	865.294	812.423	200.592	629.483	1.24173	2.94695	4.3137	4.05013	0.455628	0.998522	1.30341	1.5169	20
45	253.331	590.728	862.526	805.032	200.248	627.904	1.26509	2.94998	4.30729	4.02017	0.464199	0.999549	1.30147	1.50568	20.5
46	256.84	589.595	858.061	801.634	199.915	626.533	1.28475	2.94923	4.29213	4.00987	0.471413	0.999293	1.29689	1.50183	21
47	258.452	587.897	854.013	799.748	199.394	625.028	1.29619	2.94842	4.28304	4.01089	0.475611	0.999019	1.29414	1.50221	21.5
48	260.375	587.11	850.834	805.911	199.491	626.058	1.3052	2.94304	4.26502	4.03984	0.478917	0.997197	1.2887	1.51305	22
49	262.199	586.721	849.26	802.672	199.21	625.213	1.31619	2.94524	4.26314	4.02928	0.482952	0.997942	1.28813	1.50909	22.5
50	266.248	587.769	848.98	792.393	199.346	623.848	1.33561	2.94849	4.25883	3.97496	0.490075	0.999042	1.28683	1.48875	23
51	268.408	588.07	847.627	798.775	199.513	625.72	1.34532	2.94753	4.24848	4.00362	0.493637	0.998717	1.2837	1.49948	23.5
52	269.462	586.83	844.474	792.09	199.072	623.214	1.35359	2.94783	4.24205	3.97891	0.496674	0.998819	1.28176	1.49023	24
53	272.268	585.366	839.356	790.362	198.719	621.838	1.37012	2.9457	4.22383	3.97728	0.502737	0.998097	1.27625	1.48962	24.5
54	275.857	584.856	836.738	788.946	198.516	621.599	1.3896	2.94614	4.21497	3.97422	0.509885	0.998247	1.27357	1.48847	25
55	277.355	583.893	834.286	785.308	198.617	620.211	1.39643	2.93979	4.20048	3.95388	0.512393	0.996097	1.2692	1.48085	25.5
56	279.465	584.986	834.149	788.581	198.69	621.795	1.40654	2.94421	4.19824	3.9689	0.516102	0.997595	1.26852	1.48648	26
57	283.059	589.224	837.699	790.667	199.982	625.162	1.41542	2.94639	4.18887	3.95369	0.519362	0.99833	1.26569	1.48078	26.5
58	285.789	593.728	844.345	784.311	201.142	627.043	1.42083	2.95179	4.19776	3.89929	0.521347	1.00016	1.26838	1.46041	27
59	287.518	591.717	840.365	771.984	200.361	622.896	1.435	2.95325	4.19425	3.85297	0.526545	1.00066	1.26732	1.44306	27.5
60	288.778	590.045	836.932	769.13	199.83	621.221	1.44512	2.95273	4.18822	3.84892	0.530258	1.00048	1.26549	1.44154	28
61	290.414	588.253	832.252	766.245	199.479	619.291	1.45586	2.94895	4.17213	3.84123	0.5342	0.999198	1.26063	1.43866	28.5
62	292.091	587.219	830.096	766.119	198.971	618.881	1.46801	2.95128	4.17194	3.85041	0.538657	0.999988	1.26058	1.4421	29
63	293.118	586.521	828.926	759.311	198.269	616.969	1.47839	2.95821	4.18081	3.8297	0.542465	1.00234	1.26326	1.43434	29.5
64	294.831	586.263	827.986	755.793	198.328	616.218	1.48658	2.95603	4.17483	3.81082	0.545473	1.0016	1.26145	1.42727	30
65	297.567	586.326	826.165	758.129	198.599	617.047	1.49833	2.95231	4.15997	3.81739	0.549783	1.00034	1.25696	1.42973	30.5
66	299.152	586.211	824.647	754.854	198.1	616.216	1.51011	2.95917	4.16278	3.81047	0.554104	1.00266	1.25781	1.42714	31
67	300.16	584.906	821.581	749.932	197.752	614.145	1.51786	2.95778	4.1546	3.79229	0.556949	1.00219	1.25534	1.42033	31.5
68	301.561	583.638	818.251	750.638	197.589	613.522	1.5262	2.9538	4.14118	3.79899	0.560011	1.00084	1.25128	1.42284	32
69	303.858	582.044	814.824	748.491	196.742	612.304	1.54445	2.95841	4.14159	3.80443	0.566706	1.00241	1.2514	1.42488	32.5
70	304.388	582.107	813.179	746.81	197.07	611.621	1.54457	2.95381	4.12635	3.78957	0.566749	1.00085	1.2468	1.41931	33
71	306.402	582.723	812.358	750.511	197.178	612.998	1.55394	2.95531	4.11992	3.80626	0.570187	1.00136	1.24486	1.42557	33.5
72	308.661	582.253	809.529	745.547	196.958	611.497	1.56714	2.95623	4.11016	3.78531	0.575032	1.00167	1.24191	1.41772	34
73	311.099	580.896	805.204	746.56	196.641	610.94	1.58207	2.95409	4.09479	3.79656	0.580508	1.00094	1.23726	1.42193	34.5
74	310.822	579.835	803.336	741.19	196.164	608.796	1.5845	2.95587	4.09523	3.77842	0.581402	1.00154	1.2374	1.41514	35
75	311.17	578.237	799.961	743.195	195.963	608.141	1.5879	2.95075	4.0822	3.79253	0.58265	0.999808	1.23346	1.42042	35.5
76	313.801	577.845	797.569	736.852	195.525	606.517	1.60491	2.95535	4.07912	3.76858	0.588892	1.00137	1.23253	1.41145	36
77	314.518	577.054	796.689	735.654	195.135	605.979	1.6118	2.9572	4.08276	3.76997	0.591418	1.002	1.23363	1.41198	36.5
78	315.683	575.926	793.843	733.475	194.963	604.732	1.61919	2.95403	4.07176	3.76212	0.594132	1.00092	1.23031	1.40903	37
79	316.754	574.796	791.21	728.914	194.652	602.918	1.62728	2.95294	4.06474	3.7447	0.5971	1.00055	1.22818	1.40251	37.5
80	316.96	573.506	787.99	737.883	194.447	604.085	1.63006	2.94942	4.05247	3.79478	0.598118	0.999359	1.22448	1.42126	38
81	318.548	573.117	786.143	744.341	194.455	605.537	1.63816	2.9473	4.0428	3.82783	0.60109	0.99864	1.22155	1.43364	38.5
82	319.926	573.733	786.789	732.748	194.267	603.299	1.64684	2.95332	4.05004	3.77186	0.604275	1.00068	1.22374	1.41268	39
83	320.056	571.148	781.602	730.655	193.73	600.865	1.65207	2.94816	4.03449	3.77151	0.606196	0.998933	1.21904	1.41255	39.5
84	322.195	572.01	780.717	724.641	193.718	599.891	1.66322	2.9528	4.03017	3.7407	0.610285	1.0005	1.21774	1.40101	40
85	325.31	572.28	779.395	716.419	193.78	598.351	1.67876	2.95325	4.02206	3.69707	0.615988	1.00065	1.21529	1.38467	40.5
86	324.718	571.923	778.422	710.733	193.577	596.449	1.67746	2.9545	4.02125	3.67158	0.615512	1.00108	1.21504	1.37512	41
87	326.46	573.171	778.705	715.992	194.188	598.582	1.68115	2.95163	4.01006	3.68711	0.616867	1.00011	1.21166	1.38094	41.5
88	328.399	573.154	778.069	712.153	193.867	597.944	1.69394	2.95643	4.01342	3.67341	0.621558	1.00173	1.21268	1.37581	42
89	329.462	573.212	777.423	706.071	193.796	596.542	1.70005	2.95781	4.01155	3.64337	0.623799	1.0022	1.21211	1.36456	42.5
90	330.907	573.097	775.596	703.05	193.895	595.662	1.70663	2.95571	4.00008	3.62593	0.626215	1.00149	1.20865	1.35803	43
91	332.244	574.034	776.631	703.409	194.344	596.58	1.70957	2.9537	3.99617	3.6194	0.627292	1.00081	1.20746	1.35558	43.5
92	335.943	576.32	778.388	696.925	194.932	596.894	1.72339	2.95652	3.99313	3.57522	0.632363	1.00176	1.20654	1.33903	44
93	335.993	577.33	779.659	696.96	195.3	597.486	1.72039	2.95612	3.99211	3.56866	0.631265	1.00163	1.20624	1.33658	44.5
94	337.066	577.623	778.796	702.123	195.417	598.902	1.72486	2.95585	3.9853	3.59295	0.632902	1.00154	1.20418	1.34567	45
95	338.202	576.953	776.976	690.492	195.042	595.656	1.734	2.9581	3.98363	3.54022	0.636256	1.0023	1.20368	1.32593	45.5
96	338.066	574.936	772.503	690.65	194.571	594.039	1.73749	2.95489	3.97029	3.5496	0.63754	1.00121	1.19964	1.32944	46
97	339.49	575.075	772.718	686.845	194.28	593.532	1.74743	2.96003	3.97734	3.53534	0.641184	1.00295	1.20178	1.3241	46.5
98	339.14	575.238	772.177	690.882	194.443	594.359	1.74416	2.95839	3.97123	3.55313	0.639986	1.0024	1.19993	1.33076	47
99	341.157	574.149	768.304	688.938	194.231	593.137	1.75645	2.95601	3.95562	3.547	0.644495	1.00159	1.19521	1.32847	47.5
100	342.686	573.619	766.851	680.586	193.888	590.936	1.76744	2.95851	3.95512	3.5102	0.648529	1.00244	1.19506	1.31468	48
101	344.435	572.476	764.416	680.061	193.669	590.347	1.77847	2.95595	3.94702	3.51146	0.652576	1.00157	1.19261	1.31515	48.5
102	343.407	570.638	761.82	681.336	193.087	589.3	1.77851	2.95534	3.94548	3.52865	0.652589	1.00136	1.19215	1.32159	49
103	343.02	565.849	753.807	669.101	191.353	582.944	1.7926	2.9571	3.93935	3.49668	0.657761	1.00196	1.1903	1.30962	49.5
104	344.197	564.127	750.283	669.603	190.855	582.053	1.80345	2.95579	3.93117	3.50844	0.66174	1.00152	1.18782	1.31402	50
105	344.641	561.821	745.832	663.288	190.034	578.895	1.81358	2.95642	3.92473	3.49036	0.665456	1.00173	1.18588	1.30725	50.5
106	344.259	560.609	743.536	661.81	189.852	577.553	1.8133	2.95287	3.9164	3.48593	0.665356	1.00053	1.18336	1.30559	51
107	345.394	559.701	742.476	665.226	189.623	578.199	1.82148	2.95165	3.91554	3.50815	0.668356	1.00011	1.1831	1.31391	51.5
108	346.002	558.987	741.021	659.87	189.439	576.47	1.82646	2.95075	3.91166	3.48328	0.670183	0.999809	1.18193	1.3046	52
109	347.046	559.142	739.655	654.329	189.552	575.043	1.83087	2.94981	3.90212	3.45198	0.671804	0.99949	1.17905	1.29287	52.5
110	349.221	558.236	736.988	647.01	189.038	572.864	1.84736	2.95304	3.89862	3.42265	0.677852	1.00058	1.17799	1.28189	53
111	350.99	558.535	735.776	646.505	188.969	572.952	1.85739	2.9557	3.89363	3.42122	0.681535	1.00148	1.17648	1.28136	53.5
112	352.052	559.184	735.476	643.484	189.106	572.549	1.86166	2.95699	3.88923	3.40277	0.683102	1.00192	1.17515	1.27444	54
113	353.192	558.832	733.494	651.27	189.101	574.197	1.86774	2.9552	3.87885	3.44403	0.685332	1.00132	1.17202	1.2899	54.5
114	352.541	558.058	732.136	658.972	188.869	575.427	1.86659	2.95474	3.87642	3.48904	0.684909	1.00116	1.17128	1.30676	55
115	353.256	557.828	730.847	652.573	188.934	573.626	1.86973	2.9525	3.86827	3.45397	0.686062	1.0004	1.16882	1.29362	55.5
116	354.885	557.728	729.896	648.493	188.787	572.75	1.87982	2.95427	3.86624	3.43505	0.689762	1.001	1.16821	1.28654	56
117	354.678	556.984	727.799	640.905	188.616	570.091	1.88042	2.95301	3.85863	3.39794	0.689985	1.00057	1.16591	1.27263	56.5
118	355.956	557.35	726.369	643.416	188.877	570.773	1.88459	2.95086	3.84572	3.40653	0.691514	0.999847	1.16201	1.27586	57
119	356.17	557.22	725.738	644.028	188.847	570.789	1.88602	2.95064	3.84299	3.41032	0.69204	0.999773	1.16118	1.27727	57.5
120	355.757	556.865	725.319	638.235	188.396	569.044	1.88835	2.95582	3.84997	3.38773	0.692892	1.00153	1.16329	1.26881	58
121	356.673	556.908	723.997	641.68	188.799	569.814	1.88917	2.94974	3.83475	3.39875	0.693193	0.999467	1.15869	1.27294	58.5
122	357.054	557.122	723.701	643.349	188.842	570.307	1.89076	2.9502	3.83231	3.40681	0.693776	0.999623	1.15795	1.27596	59
123	359.548	559.14	725.815	643.207	189.577	571.928	1.89658	2.94941	3.8286	3.39285	0.695913	0.999354	1.15683	1.27073	59.5
124	361.368	558.938	724.466	639.397	189.563	571.042	1.90632	2.94856	3.82177	3.37301	0.699488	0.999067	1.15477	1.2633	60
125	363.388	559.614	725.141	638.607	189.897	571.688	1.91361	2.94693	3.8186	3.36291	0.70216	0.998516	1.15381	1.25952	60.5
126	363.496	559.297	724.806	642.239	189.957	572.46	1.91357	2.94433	3.81563	3.38097	0.702147	0.997635	1.15291	1.26628	61
127	365.725	559.238	724.168	641.947	189.585	572.769	1.92908	2.9498	3.81975	3.38606	0.707839	0.999487	1.15416	1.26819	61.5
128	366.336	557.928	721.85	639.862	189.141	571.494	1.93684	2.9498	3.81646	3.38299	0.710686	0.999487	1.15317	1.26704	62
129	367.955	557.344	718.91	635.712	189.12	569.98	1.94562	2.94704	3.80134	3.36142	0.713906	0.998552	1.1486	1.25896	62.5
130	367.692	556.521	717.653	629.465	188.482	567.833	1.95081	2.95265	3.80754	3.33966	0.715811	1.00045	1.15047	1.25081	63
131	368.87	556.659	716.167	622.453	188.42	566.037	1.9577	2.95435	3.80091	3.30354	0.71834	1.00103	1.14847	1.23728	63.5
132	369.074	556.013	714.019	623.551	188.538	565.664	1.95756	2.94908	3.78714	3.3073	0.718288	0.999242	1.1443	1.23869	64
133	369.598	555.757	712.966	617.341	188.381	563.915	1.96197	2.95018	3.7847	3.27709	0.719907	0.999614	1.14357	1.22737	64.5
134	370.074	554.976	710.088	619.561	188.026	563.675	1.96821	2.95159	3.77654	3.29508	0.722195	1.00009	1.1411	1.23411	65
135	369.422	552.269	706.592	620.438	187.096	562.18	1.97451	2.95179	3.77663	3.31615	0.724506	1.00016	1.14113	1.242	65.5
136	368.918	550.466	703.8	620.125	186.56	560.827	1.97748	2.95061	3.77251	3.324	0.725597	0.999762	1.13989	1.24494	66
137	370.635	549.67	701.831	618.82	186.254	560.239	1.98994	2.95118	3.76814	3.32245	0.730171	0.999956	1.13856	1.24436	66.5
138	372.417	549.288	700.332	622.714	186.101	561.188	2.00116	2.95156	3.76318	3.34611	0.734285	1.00008	1.13707	1.25322	67
139	371.576	547.634	697.577	618.704	185.547	558.873	2.0026	2.95146	3.75957	3.33449	0.734814	1.00005	1.13597	1.24887	67.5
140	372.543	547.573	697.546	617.982	185.518	558.911	2.00812	2.95159	3.75999	3.33112	0.736842	1.00009	1.1361	1.24761	68
141	372.435	547.243	698.022	616.919	185.483	558.655	2.00792	2.95037	3.76327	3.32601	0.736767	0.999679	1.13709	1.2457	68.5
142	372.538	546.961	697.594	611.142	185.427	557.059	2.00908	2.94974	3.7621	3.29586	0.737193	0.999466	1.13674	1.23441	69
143	374.742	546.932	696.704	612.824	185.283	557.8	2.02254	2.95187	3.76022	3.3075	0.742131	1.00019	1.13617	1.23876	69.5
144	373.176	546.69	696.154	608.069	184.953	556.022	2.01768	2.95583	3.76395	3.28769	0.740349	1.00153	1.1373	1.23135	70
145	373.653	545.81	695.09	604.7	184.835	554.813	2.02155	2.95296	3.7606	3.27157	0.741768	1.00056	1.13629	1.22531	70.5
146	373.625	545.759	694.204	610.113	184.843	555.925	2.02131	2.95255	3.75564	3.30071	0.74168	1.00042	1.13479	1.23622	71
147	373.305	544.18	691.96	606.324	184.308	553.942	2.02544	2.95256	3.75437	3.28973	0.743196	1.00042	1.1344	1.23211	71.5
148	374.228	546.032	694.474	609.492	184.856	556.056	2.02443	2.95382	3.75684	3.29712	0.742825	1.00085	1.13515	1.23488	72
149	375.202	545.578	692.209	600.848	184.416	553.459	2.03454	2.95841	3.75352	3.25811	0.746535	1.0024	1.13415	1.22027	72.5
150	378.753	546.84	693.498	600.858	184.877	554.987	2.04868	2.95786	3.75113	3.25004	0.751722	1.00222	1.13343	1.21724	73
151	379.33	546.311	691.648	600.015	184.927	554.326	2.05124	2.9542	3.74011	3.2446	0.752663	1.00098	1.1301	1.21521	73.5
152	379.615	544.591	688.182	596.67	184.202	552.264	2.06086	2.95649	3.73602	3.23922	0.756193	1.00175	1.12886	1.21319	74
153	379.902	543.651	686.334	595.126	184.011	551.253	2.06456	2.95445	3.72985	3.23419	0.757551	1.00106	1.127	1.21131	74.5
154	379.725	543.239	686.637	591.779	183.981	550.345	2.06394	2.95269	3.73211	3.21652	0.757321	1.00047	1.12768	1.20469	75
155	381.251	545.21	688.986	595.3	184.589	552.687	2.0654	2.95364	3.73254	3.225	0.75786	1.00079	1.12781	1.20787	75.5
156	378.14	543.241	686.778	596.349	184.026	551.127	2.05482	2.95198	3.73196	3.24057	0.753976	1.00023	1.12763	1.2137	76
157	381.084	543.121	686.346	597.836	183.807	552.097	2.07328	2.95484	3.73406	3.25252	0.760751	1.0012	1.12827	1.21817	76.5
158	380.819	542.668	686.156	593.751	183.894	550.849	2.07086	2.95098	3.73126	3.22877	0.759862	0.999888	1.12742	1.20928	77
159	380.732	540.92	683.162	591.079	183.321	548.973	2.07686	2.95067	3.72659	3.22428	0.762063	0.999782	1.12601	1.2076	77.5
160	379.651	540.132	680.726	589.936	183.215	547.611	2.07216	2.94808	3.71545	3.21991	0.760339	0.998903	1.12264	1.20596	78
161	377.945	538.542	678.738	594.16	182.828	547.346	2.06722	2.94562	3.71244	3.24983	0.758525	0.998071	1.12173	1.21716	78.5
162	378.759	537.688	676.702	587.341	182.366	545.122	2.07692	2.9484	3.71068	3.22067	0.762084	0.999013	1.1212	1.20624	79
163	379.029	536.776	674.326	585.447	181.9	543.894	2.08372	2.95094	3.70712	3.21851	0.764581	0.999873	1.12013	1.20543	79.5
164	379.307	536.569	673.681	584.94	181.712	543.624	2.08741	2.95285	3.70741	3.21905	0.765934	1.00052	1.12021	1.20564	80
165	381.127	537.166	673.385	583.258	181.939	543.734	2.09481	2.95245	3.70116	3.20579	0.768649	1.00039	1.11833	1.20067	80.5
166	378.704	534.533	669.6	582.719	181.416	541.389	2.08749	2.94645	3.69096	3.21206	0.765964	0.998352	1.11525	1.20302	81
167	378.046	534.065	668.598	579.483	181.191	540.048	2.08645	2.94752	3.69002	3.19819	0.765582	0.998716	1.11496	1.19782	81.5
168	379.453	533.577	667.778	577.691	180.907	539.625	2.0975	2.94945	3.69128	3.1933	0.769638	0.99937	1.11534	1.19599	82
169	379.608	534.296	669.186	581.897	180.857	541.247	2.09894	2.95425	3.70008	3.21744	0.770165	1.00099	1.118	1.20503	82.5
170	381.647	537.053	672.252	585.365	181.795	544.079	2.09933	2.95417	3.69786	3.21992	0.770307	1.00097	1.11733	1.20596	83
171	381.048	536.732	671.221	585.754	181.739	543.689	2.09668	2.95331	3.69332	3.22305	0.769335	1.00068	1.11596	1.20713	83.5
172	382.171	536.338	670.186	585.466	181.755	543.54	2.10267	2.95088	3.6873	3.22118	0.771534	0.999855	1.11414	1.20644	84
173	383.207	536.365	669.589	582.299	181.684	542.865	2.1092	2.95219	3.68546	3.20501	0.773928	1.0003	1.11358	1.20038	84.5
174	384.396	537.254	670.462	582.737	181.814	543.712	2.11423	2.95496	3.68763	3.20513	0.775774	1.00124	1.11424	1.20042	85
175	385.062	537.189	669.357	577.792	181.776	542.35	2.11833	2.95523	3.68232	3.17859	0.777281	1.00133	1.11263	1.19048	85.5
176	384.574	536.313	667.584	576.13	181.654	541.15	2.11707	2.95239	3.67503	3.17158	0.776817	1.00036	1.11043	1.18786	86
177	386.246	536.555	667.726	580.356	181.675	542.721	2.12603	2.95338	3.67539	3.19447	0.780104	1.0007	1.11054	1.19643	86.5
178	387.534	537.207	668.495	574.443	181.712	541.92	2.13268	2.95637	3.67887	3.16128	0.782546	1.00171	1.11159	1.184	87
179	385.836	536.498	669.121	575.125	181.662	541.645	2.12392	2.95328	3.68333	3.16591	0.779332	1.00066	1.11294	1.18573	87.5
180	386.172	536.411	668.556	569.839	181.583	540.245	2.1267	2.95408	3.68182	3.13817	0.78035	1.00094	1.11248	1.17535	88
181	387.393	536.862	668.162	573.296	181.693	541.428	2.13213	2.95478	3.67742	3.1553	0.782343	1.00117	1.11115	1.18176	88.5
182	386.466	536.042	667.135	574.959	181.403	541.15	2.13043	2.95498	3.67764	3.16951	0.781719	1.00124	1.11122	1.18708	89
183	386.736	536.804	667.986	575.1	181.679	541.656	2.12868	2.95468	3.67674	3.16547	0.781077	1.00114	1.11095	1.18557	89.5
184	389.092	537.005	667.022	574.367	181.671	541.871	2.14174	2.95592	3.67159	3.16158	0.78587	1.00156	1.10939	1.18411	90
185	390.033	537.114	665.744	573.792	181.589	541.671	2.14789	2.95786	3.66621	3.15984	0.788126	1.00222	1.10777	1.18346	90.5
186	390.638	537.578	666.392	565.13	181.678	539.934	2.15017	2.95896	3.66798	3.11061	0.788962	1.00259	1.1083	1.16502	91
187	390.235	537.264	664.174	570.651	181.694	540.581	2.14776	2.95697	3.65545	3.14073	0.788079	1.00192	1.10452	1.1763	91.5
188	389.467	536.14	662.193	565.624	181.3	538.356	2.14819	2.9572	3.65247	3.11982	0.788237	1.00199	1.10361	1.16847	92
189	388.517	535.674	662.124	566.654	181.127	538.242	2.145	2.95745	3.65558	3.12849	0.787065	1.00208	1.10455	1.17172	92.5
190	390.834	535.487	660.14	568.492	181.287	538.738	2.15589	2.95381	3.64141	3.13587	0.79106	1.00085	1.10027	1.17448	93
191	390.576	534.196	659.082	563.088	180.772	536.736	2.1606	2.95508	3.64593	3.11491	0.79279	1.00128	1.10164	1.16663	93.5
192	390.866	534.165	660.079	558.882	180.45	535.998	2.16606	2.96018	3.65796	3.09716	0.794795	1.00301	1.10527	1.15998	94
193	391.016	533.957	659.232	562.63	180.576	536.709	2.16538	2.95697	3.65072	3.11575	0.794545	1.00191	1.10308	1.16695	94.5
194	389.851	533.405	657.504	556.292	180.558	534.263	2.15915	2.9542	3.64151	3.08096	0.792256	1.00098	1.1003	1.15392	95
195	391.015	532.634	656.289	556.761	180.277	534.175	2.16897	2.95453	3.64045	3.08836	0.795861	1.00109	1.09998	1.15669	95.5
196	391.101	532.785	656.444	554.895	180.169	533.806	2.17075	2.95714	3.64349	3.07986	0.796513	1.00197	1.1009	1.1535	96
197	390.192	532.25	655.847	557.831	180.118	534.03	2.16631	2.95501	3.64121	3.09703	0.794887	1.00125	1.10021	1.15994	96.5
198	390.425	531.099	654.025	558.45	179.767	533.5	2.17184	2.95437	3.63818	3.10652	0.796914	1.00104	1.0993	1.16349	97
199	391.014	529.679	650.623	553.303	179.243	531.155	2.18147	2.95509	3.62984	3.08689	0.80045	1.00128	1.09678	1.15614	97.5
200	390.902	528.414	648.981	554.696	178.793	530.748	2.18634	2.95545	3.62979	3.10245	0.802234	1.0014	1.09676	1.16197	98
201	392.046	528.514	647.868	553.411	178.874	530.46	2.19174	2.95467	3.62192	3.09386	0.804218	1.00114	1.09438	1.15875	98.5
202	387.995	521.762	639.091	547.745	176.693	524.148	2.19587	2.95293	3.61696	3.09998	0.805732	1.00055	1.09288	1.16104	99
203	387.352	520.818	638.309	549.44	176.458	523.98	2.19515	2.95151	3.61734	3.11372	0.805468	1.00007	1.093	1.16619	99.5
204	384.669	518.854	635.846	548.752	175.784	522.03	2.1883	2.95166	3.6172	3.12174	0.802956	1.00012	1.09296	1.16919	100
205	384.428	517.646	632.53	552.553	175.363	521.789	2.19218	2.95185	3.60698	3.15091	0.804379	1.00018	1.08987	1.18012	100.5
206	384.212	517.466	633.141	551.974	175.24	521.698	2.19249	2.9529	3.61299	3.14982	0.804492	1.00054	1.09169	1.17971	101
207	386.29	517.449	631.986	545.844	175.049	520.392	2.20675	2.95602	3.61034	3.11824	0.809725	1.0016	1.09088	1.16788	101.5
208	384.21	515.469	628.999	545.044	174.602	518.431	2.20049	2.95225	3.60247	3.12164	0.807427	1.00032	1.08851	1.16915	102
209	385.176	514.646	628.372	544.163	174.354	518.089	2.20916	2.95173	3.604	3.12102	0.810609	1.00014	1.08897	1.16892	102.5
210	384.322	512.614	624.707	539.618	173.697	515.315	2.2126	2.9512	3.59653	3.10666	0.811871	0.99996	1.08671	1.16354	103
211	383.011	510.621	622.828	538.222	173.23	513.67	2.211	2.94765	3.59538	3.10698	0.811282	0.998758	1.08636	1.16366	103.5
212	383.031	510.255	623.13	533.33	173.165	512.437	2.21194	2.94664	3.59848	3.07989	0.811629	0.998417	1.0873	1.15352	104
213	388.011	515.585	629.869	542.336	174.878	518.95	2.21875	2.94826	3.60176	3.10122	0.814128	0.998964	1.08829	1.16151	104.5
214	388.29	516.006	629.621	542.453	175.118	519.092	2.2173	2.94662	3.59541	3.09764	0.813597	0.998409	1.08637	1.16017	105
215	387.315	514.37	627.303	543.166	174.569	518.038	2.21869	2.94651	3.59344	3.11147	0.814106	0.998374	1.08578	1.16534	105.5
216	390.984	517.286	629.736	541.565	175.341	519.893	2.22985	2.95017	3.59149	3.08864	0.8182	0.999613	1.08519	1.15679	106
217	389.774	515.854	628.268	542.789	174.899	519.171	2.22857	2.94944	3.59218	3.10344	0.817729	0.999365	1.0854	1.16234	106.5
218	389.596	515.162	627.243	538.289	174.612	517.572	2.23121	2.95032	3.59221	3.08277	0.818699	0.999665	1.08541	1.1546	107
219	390.688	514.745	625.729	539.706	174.529	517.717	2.23853	2.94934	3.58524	3.09236	0.821384	0.999331	1.0833	1.15819	107.5
220	389.575	514.6	625.57	542.969	174.45	518.178	2.23316	2.94984	3.58596	3.11246	0.819415	0.999501	1.08352	1.16572	108
221	389.756	514.682	626.469	540.017	174.324	517.731	2.23581	2.95244	3.5937	3.09778	0.820388	1.00038	1.08586	1.16022	108.5
222	389.947	513.473	624.451	540.615	174.093	517.121	2.23988	2.94942	3.58688	3.10532	0.82188	0.999358	1.0838	1.16304	109
223	389.497	513.217	624.607	538.588	173.886	516.477	2.23996	2.95146	3.59205	3.09736	0.821908	1.00005	1.08536	1.16006	109.5
224	391.207	513.861	624.521	534.058	174.182	515.912	2.24597	2.95014	3.58545	3.06609	0.824114	0.999602	1.08336	1.14835	110
225	389.432	512.971	623.64	532.727	173.703	514.692	2.24194	2.95315	3.59027	3.06688	0.822637	1.00062	1.08482	1.14865	110.5
226	390.797	513.812	624.313	533.832	173.834	515.688	2.2481	2.95576	3.59143	3.07093	0.824898	1.00151	1.08517	1.15016	111
227	390.168	513.648	623.397	533.094	173.888	515.077	2.24379	2.9539	3.58505	3.06573	0.823315	1.00088	1.08324	1.14821	111.5
228	389.315	513.171	623.208	536.572	173.922	515.567	2.23845	2.95058	3.58326	3.08513	0.821354	0.999752	1.0827	1.15548	112
229	389.491	513.251	623.484	539.45	173.638	516.419	2.24312	2.95587	3.59071	3.10675	0.82307	1.00154	1.08495	1.16358	112.5
230	391.559	512.389	621.377	536.305	173.274	515.408	2.25977	2.9571	3.58609	3.09513	0.829178	1.00196	1.08356	1.15922	113
231	392.033	512.047	620.636	534.832	173.278	514.887	2.26245	2.95506	3.58174	3.08655	0.830162	1.00127	1.08224	1.15601	113.5
232	390.43	510.862	619.988	534.945	172.984	514.056	2.25703	2.95323	3.58408	3.09245	0.828173	1.00065	1.08295	1.15822	114
233	390.896	510.611	619.2	535.753	172.883	514.115	2.26104	2.95351	3.58161	3.09893	0.829646	1.00074	1.0822	1.16065	114.5
234	391.586	509.21	616.143	531.327	172.534	512.067	2.26962	2.95136	3.57114	3.07955	0.832792	1.00002	1.07904	1.15339	115
235	389.205	507.685	614.874	531.946	172.102	510.928	2.26148	2.94991	3.57273	3.09088	0.829806	0.999524	1.07952	1.15763	115.5
236	389.004	508.212	616.378	530.653	172.289	511.062	2.25786	2.94976	3.57758	3.08002	0.828477	0.999475	1.08099	1.15356	116
237	389.92	508.101	615.454	528.129	172.199	510.401	2.26436	2.95066	3.57409	3.06697	0.830862	0.999779	1.07993	1.14868	116.5
238	389.209	507.606	615.166	525.81	171.809	509.448	2.26536	2.95448	3.58052	3.06043	0.831229	1.00107	1.08187	1.14623	117
239	387.863	507.706	615.14	523.827	171.772	508.634	2.25801	2.9557	3.58114	3.04955	0.828533	1.00149	1.08206	1.14215	117.5
240	389.917	508.231	615.367	524.398	172.199	509.478	2.26434	2.95142	3.57358	3.0453	0.830855	1.00003	1.07978	1.14056	118
241	389.947	507.113	612.94	528.584	171.768	509.646	2.2702	2.95231	3.56842	3.07731	0.833004	1.00034	1.07822	1.15255	118.5
242	392.508	508.043	614.441	523.047	171.835	509.51	2.28421	2.95657	3.57576	3.04389	0.838148	1.00178	1.08044	1.14003	119
243	392.119	507.467	613.474	524.524	171.782	509.396	2.28265	2.95413	3.57124	3.05343	0.837576	1.00096	1.07907	1.14361	119.5
244	392.907	507.205	611.932	527.083	171.701	509.782	2.28832	2.954	3.56394	3.06977	0.839655	1.00091	1.07686	1.14973	120
245	391.692	506.767	612.078	526.132	171.579	509.167	2.28287	2.95355	3.56732	3.06641	0.837654	1.00076	1.07789	1.14847	120.5
246	392.754	506.867	611.817	520.353	171.684	507.948	2.28766	2.95233	3.56362	3.03088	0.839411	1.00034	1.07677	1.13516	121
247	392.034	506.282	611.559	519.988	171.424	507.466	2.28693	2.95339	3.56752	3.03334	0.839143	1.0007	1.07795	1.13608	121.5
248	393.595	507.364	612.461	518.435	171.592	507.964	2.29378	2.9568	3.56929	3.02132	0.841659	1.00186	1.07848	1.13158	122
249	393.359	506.759	611.967	520.623	171.478	508.177	2.29393	2.95524	3.56878	3.03609	0.841714	1.00133	1.07833	1.13711	122.5
250	394.21	506.738	611.532	517.424	171.393	507.476	2.30004	2.95659	3.56801	3.01893	0.843953	1.00179	1.07809	1.13069	123
251	394.292	505.979	609.589	514.342	171.178	506.051	2.3034	2.95586	3.56114	3.00472	0.845189	1.00154	1.07602	1.12536	123.5
252	393.279	503.368	607.021	510.878	170.403	503.636	2.30793	2.95399	3.56227	2.99806	0.846852	1.00091	1.07636	1.12287	124
253	393.295	503.952	606.667	509.781	170.559	503.424	2.30592	2.95471	3.55693	2.98888	0.846112	1.00115	1.07475	1.11943	124.5
254	394.711	503.51	605.393	512.497	170.213	504.028	2.31892	2.95812	3.55668	3.01092	0.850884	1.00231	1.07467	1.12768	125
255	394.814	503.935	606.245	511.864	170.508	504.215	2.31552	2.95549	3.55552	3.00199	0.849634	1.00142	1.07432	1.12434	125.5
256	394.93	503.82	606.061	512.999	170.473	504.453	2.31667	2.95542	3.55517	3.00927	0.850058	1.00139	1.07422	1.12707	126
257	393.158	502.809	604.247	508.359	170.016	502.143	2.31248	2.95742	3.55406	2.99007	0.848518	1.00207	1.07388	1.11987	126.5
258	393.035	502.545	604.29	508.967	169.802	502.209	2.31467	2.95959	3.55879	2.99741	0.849322	1.00281	1.07531	1.12263	127
259	394.52	502.809	603.744	511.089	170.18	503.04	2.31825	2.95457	3.54768	3.00323	0.850637	1.0011	1.07195	1.1248	127.5
260	394.812	501.741	601.227	507.998	169.821	501.445	2.32487	2.95453	3.54036	2.99137	0.853066	1.00109	1.06974	1.12036	128
261	395.053	501.034	600.611	502.39	169.439	499.772	2.33154	2.95702	3.5447	2.96502	0.855512	1.00193	1.07105	1.11049	128.5
262	395.391	501.473	600.605	503.486	169.578	500.239	2.33162	2.95718	3.54176	2.96905	0.855542	1.00199	1.07016	1.112	129
263	393.367	500.712	601.307	498.622	169.394	498.502	2.3222	2.9559	3.54975	2.94356	0.852087	1.00155	1.07258	1.10246	129.5
264	393.996	499.829	599.454	501.39	168.93	498.667	2.3323	2.95879	3.54853	2.96803	0.855793	1.00253	1.07221	1.11162	130
265	394.71	499.193	598.387	498.744	168.651	497.759	2.3404	2.95992	3.54808	2.95725	0.858763	1.00292	1.07207	1.10759	130.5
266	395.392	498.162	596.632	495.237	168.314	496.356	2.34913	2.95972	3.54476	2.94234	0.861969	1.00285	1.07107	1.102	131
267	395.432	497.808	596.048	498.321	168.095	496.902	2.35243	2.96147	3.5459	2.96452	0.863179	1.00344	1.07141	1.11031	131.5
268	395.516	497.51	595.815	495.894	168.107	496.184	2.35276	2.95948	3.54426	2.94987	0.863301	1.00277	1.07092	1.10482	132
269	393.481	496.616	595.399	495.741	168.035	495.309	2.34166	2.95543	3.5433	2.95022	0.859227	1.0014	1.07063	1.10495	132.5
270	392.282	495.796	593.848	499.589	167.863	495.379	2.33692	2.95358	3.53769	2.97617	0.857486	1.00077	1.06893	1.11467	133
271	393.268	495.144	593.035	499.104	167.708	495.138	2.34496	2.95242	3.53612	2.97603	0.860436	1.00037	1.06846	1.11462	133.5
272	394.103	495.476	592.483	489.4	167.695	492.865	2.35012	2.95463	3.5331	2.91839	0.86233	1.00112	1.06755	1.09303	134
273	392.358	495.809	594.631	489.34	167.896	493.034	2.33691	2.95307	3.54166	2.91454	0.857484	1.0006	1.07013	1.09159	134.5
274	394.872	495.96	593.733	494.236	167.907	494.7	2.35173	2.95378	3.53608	2.94351	0.862922	1.00083	1.06845	1.10244	135
275	392.636	495.611	593.986	496.649	167.794	494.721	2.33999	2.95369	3.53997	2.95987	0.858613	1.0008	1.06962	1.10857	135.5
276	392.145	495.865	595.063	499.676	167.884	495.687	2.33581	2.95362	3.54449	2.97632	0.85708	1.00078	1.07099	1.11473	136
277	392.181	497.055	596.647	499.771	168.022	496.413	2.33411	2.95827	3.55101	2.97444	0.856454	1.00236	1.07296	1.11402	136.5
278	392.622	497.042	594.872	500.647	167.846	496.296	2.33918	2.9613	3.54415	2.98278	0.858317	1.00338	1.07089	1.11714	137
279	390.987	496.902	595.255	497.229	167.923	495.093	2.32837	2.95911	3.54481	2.96105	0.85435	1.00264	1.07108	1.10901	137.5
280	390.89	495.857	594.849	495.052	167.643	494.162	2.33168	2.95782	3.54831	2.95301	0.855565	1.0022	1.07214	1.106	138
281	389.885	495.06	593.67	492.813	167.49	492.857	2.32781	2.95576	3.54451	2.94234	0.854145	1.00151	1.07099	1.102	138.5
282	389.255	494.849	593.136	494.837	167.486	493.019	2.3241	2.95457	3.54141	2.9545	0.852785	1.0011	1.07006	1.10655	139
283	389.085	493.839	591.554	493.83	167.114	492.077	2.32826	2.9551	3.53982	2.95505	0.85431	1.00128	1.06958	1.10676	139.5
284	389.166	493.582	591.404	492.272	166.891	491.606	2.33186	2.95751	3.54365	2.94966	0.85563	1.0021	1.07073	1.10474	140
285	388.228	491.679	589.287	489.2	166.244	489.599	2.33529	2.95757	3.54471	2.94266	0.856889	1.00212	1.07105	1.10212	140.5
286	388.711	490.231	587.499	493.128	165.812	489.892	2.34429	2.95655	3.54316	2.97402	0.860191	1.00177	1.07059	1.11386	141
287	387.889	489.974	586.483	491.177	165.65	488.881	2.34162	2.95789	3.5405	2.96515	0.859211	1.00223	1.06978	1.11054	141.5
288	389.626	490.088	585.178	488.653	165.456	488.386	2.35486	2.96204	3.53676	2.95337	0.864071	1.00364	1.06865	1.10613	142
289	390.199	490.165	585.575	489.652	165.464	488.898	2.35821	2.96237	3.53899	2.95927	0.8653	1.00375	1.06932	1.10834	142.5
290	387.685	489	584.882	486.139	165.147	486.927	2.34751	2.961	3.54158	2.94367	0.861375	1.00328	1.07011	1.1025	143
291	388.642	488.033	582.811	485.966	164.668	486.363	2.36015	2.96374	3.53931	2.95119	0.866013	1.00421	1.06942	1.10531	143.5
292	385.888	485.638	580.543	481.498	164.207	483.392	2.35001	2.95747	3.53543	2.93226	0.86229	1.00209	1.06825	1.09823	144
293	386.491	485.16	579.427	480.851	164.015	482.982	2.35644	2.95802	3.53277	2.93175	0.864649	1.00227	1.06745	1.09803	144.5
294	383.558	483.835	577.507	484.84	163.671	482.435	2.34347	2.95614	3.52846	2.96228	0.859891	1.00164	1.06614	1.10947	145
295	383.086	483.617	576.996	485.131	163.582	482.207	2.34186	2.95642	3.52726	2.96567	0.8593	1.00173	1.06578	1.11074	145.5
296	384.02	483.052	575.229	483.516	163.353	481.454	2.35086	2.95711	3.52139	2.95995	0.862602	1.00196	1.06401	1.10859	146
297	385.365	482.805	575.496	483.556	163.27	481.806	2.36029	2.9571	3.52481	2.9617	0.866064	1.00196	1.06504	1.10925	146.5
298	385.321	482.716	575.078	486.606	163.095	482.43	2.36256	2.95972	3.52603	2.98357	0.866894	1.00285	1.06541	1.11744	147
299	384.303	482.296	575.018	484.632	163.137	481.562	2.35571	2.95639	3.52476	2.97071	0.864381	1.00172	1.06502	1.11262	147.5
300	384.801	481.63	572.259	486.759	162.958	481.362	2.36135	2.95555	3.5117	2.98702	0.866452	1.00143	1.06108	1.11873	148
301	384.214	481.317	572.402	485.968	162.929	480.975	2.35817	2.95415	3.5132	2.9827	0.865284	1.00096	1.06153	1.11712	148.5
302	384.466	481.498	572.707	476.293	162.931	478.741	2.35969	2.95523	3.51503	2.92328	0.865841	1.00133	1.06209	1.09486	149
303	384.914	481.285	570.311	473.943	162.932	477.613	2.36242	2.9539	3.5003	2.90884	0.866844	1.00088	1.05764	1.08945	149.5
304	383.997	480.759	570.461	477.087	162.874	478.076	2.35763	2.95172	3.50247	2.92918	0.865087	1.00014	1.05829	1.09707	150
305	384.627	480.751	570.534	477.466	162.657	478.344	2.36465	2.95561	3.50759	2.93542	0.867663	1.00146	1.05984	1.09941	150.5
306	383.139	481.053	572.052	479.527	162.74	478.943	2.3543	2.95596	3.51513	2.94658	0.863865	1.00157	1.06212	1.10359	151
307	384.343	481.501	571.859	485.879	162.878	480.895	2.3597	2.95621	3.51097	2.98309	0.865846	1.00166	1.06086	1.11726	151.5
308	383.273	481.735	572.822	483.25	162.73	480.27	2.35527	2.96033	3.52008	2.96964	0.86422	1.00306	1.06361	1.11223	152
309	383.084	481.808	573.039	480.379	162.76	479.577	2.35367	2.96024	3.52076	2.95146	0.863635	1.00302	1.06382	1.10541	152.5
310	381.66	479.935	570.904	479.322	162.155	477.955	2.35367	2.95973	3.52073	2.95595	0.863635	1.00285	1.06381	1.1071	153
311	381.28	479.961	571.617	476.923	162.206	477.445	2.35059	2.95896	3.52402	2.94023	0.862504	1.00259	1.0648	1.10121	153.5
312	382.141	479.163	570.233	473.416	161.867	476.238	2.36083	2.96023	3.52285	2.92472	0.866262	1.00302	1.06445	1.0954	154
313	383.781	478.539	568.501	470.938	161.645	475.44	2.37422	2.96043	3.51697	2.91341	0.871174	1.00309	1.06267	1.09116	154.5
314	382.815	477.297	566.904	471.42	161.141	474.609	2.37565	2.96198	3.51806	2.92551	0.871699	1.00362	1.063	1.0957	155
315	383.178	477.235	567.648	471.041	160.961	474.776	2.38056	2.96491	3.52662	2.92643	0.873502	1.00461	1.06559	1.09604	155.5
316	383.973	475.969	563.722	470.344	160.67	473.502	2.38982	2.9624	3.50857	2.92739	0.876899	1.00376	1.06013	1.0964	156
317	383.291	474.978	562.399	472.636	160.441	473.326	2.38898	2.96045	3.50533	2.94586	0.876591	1.0031	1.05916	1.10332	156.5
318	381.238	473.747	561.513	472.729	160.178	472.307	2.38009	2.95763	3.50556	2.95127	0.873328	1.00214	1.05922	1.10535	157
319	380.806	472.743	559.609	467.657	159.97	470.204	2.38048	2.9552	3.49821	2.9234	0.873472	1.00132	1.057	1.09491	157.5
320	382.577	473.681	560.548	468.921	160.083	471.432	2.38987	2.95897	3.50161	2.92924	0.876915	1.00259	1.05803	1.09709	158
321	382.705	473.935	561.54	475.698	160.319	473.469	2.38715	2.9562	3.50264	2.9672	0.875917	1.00166	1.05834	1.11131	158.5
322	382.755	473.581	560.793	475.246	160.108	473.094	2.39061	2.95788	3.50259	2.96828	0.877186	1.00223	1.05833	1.11172	159
323	382.64	472.551	558.804	476.411	159.924	472.601	2.39264	2.95485	3.49418	2.97898	0.877931	1.0012	1.05579	1.11572	159.5
324	381.427	470.726	557.297	483.282	159.79	473.183	2.38705	2.9459	3.48768	3.02448	0.875882	0.998167	1.05382	1.13276	160
325	381.786	470.697	557.302	481.086	159.511	472.718	2.39348	2.95087	3.49382	3.01601	0.87824	0.999851	1.05568	1.12959	160.5
326	381.089	469.406	555.635	477.23	159.045	470.84	2.39611	2.9514	3.49357	3.0006	0.879205	1.00003	1.0556	1.12382	161
327	380.29	468.952	554.352	475.53	158.813	469.781	2.39458	2.95286	3.4906	2.99428	0.878644	1.00052	1.0547	1.12145	161.5
328	380.662	468.024	553.046	473.966	158.598	468.924	2.40017	2.95101	3.48709	2.98847	0.880695	0.999896	1.05364	1.11928	162
329	381.065	467.116	550.549	470.353	158.305	467.271	2.40716	2.95073	3.47777	2.97118	0.883259	0.999804	1.05083	1.1128	162.5
330	379.195	466.171	549.596	469.464	157.823	466.106	2.40266	2.95376	3.48236	2.97462	0.881609	1.00083	1.05221	1.11409	163
331	380.278	465.413	548.091	464.953	157.561	464.684	2.41353	2.95386	3.4786	2.95094	0.885597	1.00086	1.05108	1.10522	163.5
332	379.834	464.429	546.787	460.585	157.314	462.909	2.4145	2.95224	3.47577	2.92781	0.885952	1.00031	1.05022	1.09656	164
333	381.083	467.635	551.628	463.812	158.351	466.039	2.40657	2.95315	3.48358	2.92901	0.883045	1.00062	1.05258	1.09701	164.5
334	379.357	467.838	553.213	470.615	158.45	467.756	2.39417	2.95259	3.4914	2.97012	0.878496	1.00043	1.05495	1.1124	165
335	378.94	467.491	551.659	466.557	158.204	466.162	2.39526	2.95499	3.48701	2.94908	0.878895	1.00125	1.05362	1.10453	165.5
336	379.455	467.797	552.104	466.434	158.458	466.447	2.39467	2.95218	3.48423	2.94358	0.878678	1.00029	1.05278	1.10246	166
337	381.11	469.223	553.573	460.351	158.694	466.064	2.40154	2.95678	3.4883	2.90087	0.881198	1.00185	1.05401	1.08647	166.5
338	381.808	469.716	553.043	467.04	158.686	467.902	2.40606	2.96003	3.48514	2.94317	0.882857	1.00295	1.05305	1.10231	167
339	382.577	470.618	554.248	465.223	159.138	468.166	2.40406	2.95729	3.48281	2.92339	0.882122	1.00203	1.05235	1.0949	167.5
340	380.699	469.463	553.706	462.769	158.577	466.659	2.40072	2.96047	3.49172	2.91826	0.880898	1.0031	1.05504	1.09298	168
341	381.859	468.576	552.372	464.478	158.489	466.821	2.40937	2.95652	3.48524	2.93066	0.884072	1.00176	1.05308	1.09763	168.5
342	382.466	468.74	552.44	463.618	158.364	466.816	2.41511	2.95989	3.48842	2.92755	0.886177	1.00291	1.05405	1.09646	169
343	382.685	468.055	550.22	461.644	158.208	465.651	2.41887	2.95848	3.47783	2.91796	0.887558	1.00243	1.05084	1.09287	169.5
344	380.01	465.725	548.625	465.355	157.563	464.929	2.4118	2.9558	3.48194	2.95345	0.884962	1.00152	1.05209	1.10616	170
345	379.885	464.564	546.665	459.932	157.337	462.762	2.41447	2.95267	3.47448	2.92323	0.885942	1.00046	1.04983	1.09484	170.5
346	379.94	464.107	545.797	458.571	156.917	462.104	2.42128	2.95766	3.47825	2.92238	0.888442	1.00215	1.05097	1.09452	171
347	379.363	464.612	547.448	453.062	156.914	461.121	2.41765	2.96093	3.48884	2.88733	0.887109	1.00326	1.05417	1.0814	171.5
348	380.117	464.144	546.862	456.766	156.848	461.972	2.42347	2.9592	3.48657	2.91216	0.889247	1.00267	1.05349	1.0907	172
349	379.984	463.234	546.314	455.814	156.63	461.337	2.426	2.9575	3.48793	2.91013	0.890173	1.0021	1.0539	1.08994	172.5
