# Supplementary material for: Distinct states of nucleolar stress induced by anticancer drugs
Source: eLife journal article supplement (doi:10.7554/elife.88799), 2023-07-14
Supplement: fig6-data1 [file 6F.xlsx]

## Sheet: All wholes
Time, sec	Untr avg whole	CX avg whole	Flavo avg droplets	Stdev untr whole	Stdev CX whole	Stdev Flavo droplets
-1.5	1.00096	0.999454	0.998356	0.00294484	0.00289048	0.0189192
-1	0.999038	0.999659	0.997998	0.00166507	0.00132365	0.0129507
-0.5	1	1.00089	1.00365	0.0024273	0.00212697	0.0169477
0	0.0266694	0.0429011	0.0730668	0.011966	0.013372	0.045346
0.5	0.0413922	0.0672468	0.117558	0.0169323	0.0207558	0.0690014
1	0.05858	0.104773	0.176965	0.0243481	0.0277094	0.0848779
1.5	0.0757834	0.14148	0.238183	0.0326613	0.0359565	0.101759
2	0.0919163	0.176998	0.290047	0.0404073	0.0438603	0.110446
2.5	0.107552	0.210964	0.340815	0.0473943	0.0507541	0.114851
3	0.123104	0.244005	0.38677	0.0547183	0.058293	0.116653
3.5	0.136998	0.275488	0.430533	0.0612247	0.0642307	0.116784
4	0.147861	0.304875	0.474156	0.0686768	0.0697098	0.124611
4.5	0.162198	0.330636	0.506687	0.0735246	0.0736363	0.129431
5	0.176152	0.354878	0.532932	0.077639	0.0771243	0.122576
5.5	0.189496	0.378398	0.560927	0.081327	0.0799427	0.119291
6	0.203718	0.401231	0.588233	0.0831766	0.0830093	0.126737
6.5	0.215065	0.421892	0.610802	0.0868447	0.0851875	0.126377
7	0.227167	0.440574	0.628558	0.0893691	0.0862842	0.129726
7.5	0.239361	0.45871	0.652888	0.0926453	0.0884823	0.129063
8	0.250437	0.476323	0.677649	0.0947456	0.0903203	0.120327
8.5	0.259985	0.493173	0.687765	0.0975189	0.0921678	0.122864
9	0.269794	0.508887	0.708406	0.0998889	0.0929418	0.1333
9.5	0.280655	0.52323	0.723296	0.101946	0.0930961	0.138227
10	0.290188	0.536797	0.73435	0.10249	0.0940762	0.133925
10.5	0.300671	0.54949	0.753718	0.105981	0.0956829	0.132078
11	0.308859	0.562011	0.752339	0.106625	0.0967929	0.14102
11.5	0.317304	0.575162	0.774546	0.107271	0.0971775	0.127073
12	0.326852	0.585755	0.784766	0.109375	0.0971082	0.124317
12.5	0.334885	0.595757	0.796337	0.109811	0.0967894	0.125063
13	0.342722	0.606907	0.806305	0.111707	0.0976794	0.123333
13.5	0.351661	0.616897	0.820711	0.112411	0.0973708	0.129688
14	0.359042	0.626308	0.830478	0.113198	0.0965135	0.128153
14.5	0.366092	0.635411	0.852341	0.115163	0.0976428	0.129514
15	0.373654	0.642847	0.857672	0.115193	0.0962112	0.115528
15.5	0.380722	0.652055	0.863512	0.116226	0.095056	0.124511
16	0.387083	0.660573	0.859847	0.117585	0.0962402	0.125595
16.5	0.394885	0.666667	0.869224	0.119011	0.0950695	0.120228
17	0.400993	0.674416	0.872592	0.119273	0.0952203	0.113572
17.5	0.408004	0.681735	0.884335	0.119448	0.0942865	0.128506
18	0.414515	0.688864	0.887809	0.119603	0.0947786	0.129376
18.5	0.420153	0.695903	0.890652	0.120254	0.0960394	0.128732
19	0.425629	0.700667	0.891533	0.12041	0.0956283	0.128443
19.5	0.431576	0.706807	0.901723	0.120635	0.0955608	0.131774
20	0.437669	0.713116	0.902945	0.121487	0.0955563	0.124474
20.5	0.443604	0.717949	0.9046	0.121124	0.0942402	0.122472
21	0.449467	0.723971	0.912813	0.121435	0.0960171	0.11253
21.5	0.454239	0.727871	0.914463	0.120609	0.0953821	0.110947
22	0.460074	0.733546	0.910118	0.122487	0.0959607	0.119606
22.5	0.465584	0.736942	0.917784	0.122574	0.0945166	0.113679
23	0.471385	0.741456	0.919595	0.122279	0.0942021	0.113997
23.5	0.476326	0.745479	0.929398	0.121343	0.0927336	0.108743
24	0.480675	0.749756	0.923614	0.120747	0.0924397	0.107988
24.5	0.486131	0.753513	0.935225	0.121504	0.0919453	0.110243
25	0.490733	0.758144	0.928104	0.122634	0.0912588	0.115083
25.5	0.494363	0.762337	0.933636	0.122076	0.0905673	0.117588
26	0.501987	0.764966	0.936011	0.121733	0.0895525	0.118977
26.5	0.506545	0.768867	0.94333	0.121437	0.0885863	0.119478
27	0.510883	0.772527	0.936846	0.122965	0.0884703	0.115845
27.5	0.514554	0.777636	0.934399	0.121462	0.088786	0.109662
28	0.51881	0.780063	0.932042	0.121972	0.0874467	0.10135
28.5	0.523029	0.783678	0.933265	0.121284	0.0877689	0.105929
29	0.526547	0.787451	0.941088	0.120368	0.0861257	0.113338
29.5	0.530873	0.790957	0.948184	0.120375	0.0859806	0.105753
30	0.535238	0.794286	0.946829	0.12016	0.0852032	0.116401
30.5	0.54002	0.796534	0.953917	0.122466	0.0854685	0.128565
31	0.544004	0.798499	0.968782	0.121693	0.084453	0.135427
31.5	0.547624	0.80136	0.961113	0.12077	0.0832133	0.13131
32	0.551381	0.803303	0.962817	0.120555	0.0842721	0.133399
32.5	0.554747	0.806479	0.972522	0.119284	0.0840734	0.12877
33	0.558169	0.8097	0.979188	0.119595	0.0842683	0.119122
33.5	0.560331	0.811676	0.973263	0.118421	0.0840168	0.123699
34	0.564578	0.813617	0.973405	0.118504	0.083615	0.118975
34.5	0.56888	0.81487	0.983309	0.118969	0.0814659	0.113369
35	0.572053	0.816128	0.985948	0.118306	0.0809337	0.0972882
35.5	0.576497	0.81787	0.990225	0.117153	0.0789194	0.101635
36	0.581157	0.820711	0.979523	0.118634	0.0784471	0.105282
36.5	0.584362	0.823139	0.979078	0.119426	0.0780997	0.100524
37	0.586196	0.824444	0.976812	0.119078	0.0775064	0.10564
37.5	0.590102	0.828016	0.968178	0.119168	0.0785871	0.113946
38	0.593566	0.830268	0.982371	0.118769	0.0793391	0.109945
38.5	0.595804	0.831899	0.976978	0.118784	0.0771763	0.104417
39	0.598575	0.832498	0.98244	0.116892	0.0761529	0.113143
39.5	0.601748	0.83429	0.979015	0.116893	0.0753143	0.116951
40	0.60474	0.835085	0.98178	0.117186	0.074372	0.122791
40.5	0.607854	0.838263	0.991815	0.117449	0.0759446	0.109623
41	0.611201	0.840142	0.978033	0.118195	0.0763055	0.12558
41.5	0.614945	0.842429	0.97953	0.117862	0.0746773	0.121342
42	0.618224	0.843548	0.984746	0.118613	0.0734869	0.130386
42.5	0.621436	0.845452	0.981329	0.118419	0.0740424	0.110776
43	0.622462	0.846939	0.988531	0.115959	0.0739195	0.120795
43.5	0.624244	0.849428	0.994096	0.115634	0.0730209	0.114995
44	0.628503	0.850178	0.993739	0.1156	0.0710289	0.122068
44.5	0.630515	0.851943	0.99691	0.115391	0.0715341	0.122978
45	0.633718	0.853004	1.00048	0.115202	0.0717633	0.12594
45.5	0.637653	0.85451	1.0075	0.115771	0.0727471	0.119477
46	0.639855	0.855499	0.992382	0.115262	0.0734995	0.140109
46.5	0.642522	0.856747	0.992297	0.114609	0.0714487	0.142716
47	0.643588	0.858033	0.986393	0.113043	0.0721291	0.164772
47.5	0.64482	0.858784	0.995646	0.11409	0.0721229	0.147463
48	0.648169	0.859389	1.00764	0.112795	0.0711467	0.126754
48.5	0.649799	0.860609	1.00685	0.11357	0.0693719	0.125724
49	0.652755	0.862294	1.00515	0.113277	0.0710653	0.137531
49.5	0.654356	0.862675	1.00194	0.113115	0.0714841	0.143422
50	0.657472	0.863948	1.00783	0.113511	0.0715767	0.148005
50.5	0.659485	0.864733	1.01162	0.113603	0.0690681	0.153547
51	0.661673	0.864678	1.01463	0.112174	0.0690257	0.150434
51.5	0.664133	0.865763	1.00991	0.113435	0.0687938	0.137445
52	0.666792	0.866238	1.0036	0.113104	0.0698533	0.132966
52.5	0.669771	0.867543	1.00784	0.113803	0.0690584	0.143104
53	0.67198	0.868686	1.0042	0.112714	0.0691965	0.132851
53.5	0.674466	0.869636	1.0018	0.111859	0.0693656	0.119016
54	0.676757	0.871053	1.00053	0.112006	0.0691648	0.120783
54.5	0.679025	0.872059	1.01432	0.111643	0.0683543	0.112846
55	0.680007	0.872256	1.01747	0.113131	0.0670075	0.113913
55.5	0.681647	0.872201	1.01525	0.110713	0.0662993	0.0919787
56	0.683333	0.872901	1.01978	0.110492	0.0662374	0.0992088
56.5	0.684093	0.873913	1.01667	0.109436	0.065814	0.106881
57	0.687259	0.874721	1.02063	0.109753	0.0647718	0.111143
57.5	0.690281	0.876631	1.01195	0.110076	0.0655979	0.100896
58	0.691583	0.878033	1.00947	0.108831	0.0664478	0.115532
58.5	0.693698	0.879748	1.00505	0.106911	0.0677579	0.115706
59	0.693052	0.879601	0.998983	0.106105	0.0664822	0.118411
59.5	0.695703	0.879239	1.0065	0.106223	0.0661989	0.119252
60	0.697278	0.88115	0.997798	0.10457	0.0662525	0.116604
60.5	0.697895	0.882153	1.00423	0.10472	0.0660586	0.0959705
61	0.702552	0.882214	0.998842	0.106354	0.0661145	0.104288
61.5	0.703614	0.885366	1.01082	0.105729	0.0673994	0.119993
62	0.704202	0.885682	0.999402	0.105063	0.0658424	0.122946
62.5	0.705006	0.886308	0.993194	0.105163	0.0664987	0.122
63	0.705822	0.886736	1.0077	0.104894	0.0660491	0.117729
63.5	0.706759	0.887605	1.01668	0.105732	0.0664419	0.0995277
64	0.708797	0.888215	1.01489	0.104937	0.0658176	0.0926285
64.5	0.7111	0.889547	1.00528	0.103757	0.0666608	0.10412
65	0.712025	0.889099	1.00189	0.103017	0.0661023	0.114664
65.5	0.712878	0.889244	1.00268	0.102607	0.0661305	0.107051
66	0.715289	0.889276	0.988753	0.104684	0.0642999	0.113799
66.5	0.716443	0.891833	0.995731	0.103794	0.0671074	0.112108
67	0.719518	0.892449	0.997589	0.103475	0.0675939	0.107955
67.5	0.720812	0.892768	0.986169	0.105033	0.0669236	0.114111
68	0.722282	0.892794	0.997799	0.104512	0.0664736	0.117379
68.5	0.722691	0.893454	0.99411	0.103928	0.0664339	0.113522
69	0.725504	0.893589	0.989719	0.10292	0.0663688	0.0994828
69.5	0.727863	0.894154	0.989142	0.1038	0.066072	0.100812
70	0.728221	0.894457	0.983801	0.102898	0.0668496	0.106857
70.5	0.729709	0.896196	0.979925	0.101017	0.0669172	0.106785
71	0.730239	0.896817	0.991479	0.101463	0.0661071	0.10615
71.5	0.732205	0.897545	0.997557	0.101203	0.0652438	0.0905025
72	0.733993	0.89963	1.0004	0.10061	0.0647666	0.0902277
72.5	0.735707	0.899316	0.998325	0.100837	0.0648007	0.089103
73	0.737932	0.900527	1.00343	0.101178	0.0652968	0.0976475
73.5	0.737762	0.900609	1.00046	0.101686	0.0640553	0.107051
74	0.739522	0.900013	1.00552	0.101077	0.0636873	0.0778911
74.5	0.738977	0.900011	1.01607	0.0992917	0.0623745	0.0952403
75	0.741171	0.900986	1.01082	0.0999518	0.0644663	0.106177
75.5	0.743091	0.900015	1.01032	0.0998267	0.0614461	0.0950785
76	0.74506	0.900936	1.00032	0.100103	0.0618892	0.102668
76.5	0.746344	0.89916	1.01439	0.100472	0.0620491	0.0923303
77	0.74607	0.899312	1.0041	0.0993816	0.0612814	0.091323
77.5	0.745985	0.900744	1.00534	0.0985371	0.0627351	0.0858978
78	0.748857	0.901201	0.998689	0.097839	0.0620475	0.0864935
78.5	0.751616	0.902	1.00208	0.0960905	0.0611656	0.0901471
79	0.752578	0.902206	1.00033	0.0971543	0.0631532	0.0977485
79.5	0.753894	0.90256	1.00802	0.0964219	0.0630669	0.0810563
80	0.755893	0.902933	1.01027	0.0951663	0.0627718	0.0788325
80.5	0.755987	0.904839	1.01284	0.0950783	0.0638074	0.0766395
81	0.760049	0.905459	0.99708	0.0955846	0.0626924	0.0833786
81.5	0.760054	0.90688	1.01313	0.0958209	0.0621858	0.0788064
82	0.759462	0.905547	1.00737	0.0953645	0.0627031	0.0813993
82.5	0.761617	0.905106	1.0148	0.0944948	0.0632685	0.0847724
83	0.762698	0.906622	1.01972	0.0950879	0.0631057	0.078547
83.5	0.763084	0.907977	1.0245	0.0942479	0.0638865	0.0772019
84	0.763285	0.908746	1.02513	0.0943601	0.0645906	0.0779105
84.5	0.764227	0.908941	1.03405	0.0939385	0.0654328	0.0815197
85	0.765001	0.910237	1.03536	0.09463	0.064436	0.0980005
85.5	0.767277	0.910015	1.03866	0.0951214	0.063964	0.0956385
86	0.769109	0.909148	1.04633	0.0950564	0.0617724	0.121264
86.5	0.76861	0.908978	1.03556	0.0924215	0.0604637	0.124885
87	0.770643	0.908999	1.03707	0.0913725	0.0592196	0.130081
87.5	0.771216	0.906687	1.03583	0.0902397	0.0599408	0.127154
88	0.770365	0.906971	1.03397	0.0898712	0.0603802	0.118935
88.5	0.772516	0.907443	1.02938	0.0883456	0.0608506	0.137354
89	0.77244	0.908309	1.01319	0.0898685	0.0617694	0.123547
89.5	0.774208	0.908856	1.01943	0.088076	0.0604979	0.130056
90	0.775756	0.908597	1.0416	0.0879496	0.0605626	0.118764
90.5	0.777378	0.909428	1.04752	0.0884282	0.0617501	0.12397
91	0.777385	0.91049	1.03247	0.0877724	0.0617793	0.133111
91.5	0.777898	0.91071	1.04433	0.0870665	0.0625869	0.131287
92	0.779363	0.911606	1.03678	0.0894008	0.061537	0.133591
92.5	0.77939	0.912238	1.02452	0.0889569	0.0627277	0.129893
93	0.779725	0.913784	1.032	0.0882601	0.0646484	0.132855
93.5	0.781954	0.913164	1.02543	0.088747	0.0634393	0.138508
94	0.782435	0.913422	1.03773	0.0885839	0.0633486	0.139769
94.5	0.785185	0.91446	1.04244	0.0900554	0.064388	0.136844
95	0.785231	0.914213	1.03888	0.0894131	0.0645885	0.134014
95.5	0.786297	0.914392	1.04319	0.0877762	0.0660011	0.147226
96	0.787241	0.914504	1.04524	0.0888929	0.0661788	0.141926
96.5	0.787835	0.915207	1.02786	0.0887645	0.0655956	0.153342
97	0.789209	0.913715	1.02174	0.0878598	0.0650128	0.164958
97.5	0.788716	0.913914	1.03091	0.0884016	0.0641534	0.15259
98	0.789609	0.913971	1.01486	0.0886622	0.0652834	0.167972
98.5	0.79265	0.91344	1.01103	0.0885043	0.0640329	0.168788
99	0.793493	0.913428	1.00919	0.0880149	0.0624932	0.161563
99.5	0.793963	0.913138	1.00825	0.0866183	0.0621992	0.165026
100	0.79272	0.913319	0.998992	0.0846477	0.0611747	0.161486
100.5	0.793247	0.914385	1.00955	0.08464	0.0624015	0.17646
101	0.794297	0.913972	1.01093	0.084693	0.0615716	0.154962
101.5	0.794759	0.914374	1.00453	0.0852707	0.0628496	0.153531
102	0.795587	0.915028	1.00398	0.0827161	0.0640207	0.139909
102.5	0.795825	0.915209	1.02349	0.083414	0.064086	0.156857
103	0.795916	0.914762	1.03203	0.0828449	0.0640569	0.139026
103.5	0.797373	0.917094	1.04376	0.0818248	0.065615	0.152993
104	0.799139	0.916358	1.02533	0.0824398	0.0650532	0.144917
104.5	0.799915	0.916722	1.02001	0.0815635	0.0644538	0.158315
105	0.800404	0.91645	1.0273	0.0813198	0.0653934	0.14061
105.5	0.801321	0.915967	1.02774	0.0815116	0.0653199	0.13143
106	0.803651	0.91558	1.03538	0.0827862	0.0658109	0.139484
106.5	0.803438	0.916521	1.03129	0.0836738	0.0647313	0.137029
107	0.805083	0.915919	1.03841	0.0826661	0.0651644	0.129334
107.5	0.805605	0.917202	1.03854	0.0836852	0.0669567	0.137875
108	0.807136	0.917371	1.03828	0.0832304	0.067434	0.144158
108.5	0.806025	0.916746	1.0274	0.0819545	0.0671312	0.144105
109	0.80692	0.918228	1.02436	0.0813878	0.0675235	0.13845
109.5	0.805327	0.918571	1.01933	0.0813102	0.0679644	0.135353
110	0.806315	0.917718	1.01711	0.0813413	0.0673219	0.152829
110.5	0.805014	0.917789	1.02868	0.0769377	0.0661944	0.167821
111	0.807992	0.918703	1.01819	0.0787976	0.0662264	0.171757
111.5	0.809339	0.917793	1.0257	0.0779465	0.0663871	0.171109
112	0.807951	0.917801	1.02459	0.0777735	0.0672922	0.156287
112.5	0.807931	0.916927	1.01713	0.0777222	0.0670906	0.168282
113	0.809098	0.91743	1.01568	0.076554	0.0680966	0.135668
113.5	0.807193	0.918122	1.01952	0.0758633	0.0687787	0.145354
114	0.80874	0.918019	1.01709	0.0763964	0.0685895	0.142577
114.5	0.808016	0.917758	1.01018	0.0739122	0.0672488	0.139322
115	0.80881	0.917961	1.01721	0.0748759	0.0673982	0.122377
115.5	0.811806	0.917972	1.02714	0.0754258	0.0669119	0.132303
116	0.811125	0.918009	1.01563	0.0720562	0.0673221	0.141931
116.5	0.812823	0.918707	1.02183	0.0744514	0.0675941	0.132899
117	0.814195	0.918445	1.02025	0.0743703	0.0675861	0.133705
117.5	0.815913	0.919278	1.03385	0.0733035	0.0684166	0.143194
118	0.81643	0.9212	1.02937	0.0740282	0.0687812	0.141133
118.5	0.819145	0.920615	1.01635	0.0748449	0.0680775	0.142661
119	0.817385	0.919076	1.02258	0.0717181	0.0655299	0.142474
119.5	0.816436	0.919771	1.01538	0.0727789	0.065686	0.150648
120	0.818832	0.920271	1.02193	0.073302	0.0641353	0.149282
120.5	0.818284	0.919307	1.01593	0.072467	0.063527	0.145272
121	0.818187	0.919813	1.02191	0.072235	0.064752	0.151892
121.5	0.818215	0.919102	1.02721	0.0719862	0.0659217	0.136837
122	0.819821	0.919981	1.03076	0.0731509	0.0655135	0.143532
122.5	0.821031	0.919877	1.03656	0.0715988	0.0642565	0.127279
123	0.819624	0.920018	1.03165	0.069629	0.0650787	0.124949
123.5	0.8224	0.921657	1.03071	0.0697238	0.064344	0.119728
124	0.823364	0.920794	1.03595	0.070273	0.063652	0.132419
124.5	0.823221	0.919418	1.02848	0.0706004	0.0632015	0.149392
125	0.824378	0.919524	1.02764	0.0700279	0.0637232	0.136573
125.5	0.822243	0.920219	1.0199	0.0674286	0.0635959	0.156796
126	0.822713	0.919847	1.02703	0.0678695	0.0640671	0.163816
126.5	0.824092	0.921116	1.02815	0.0683769	0.0651847	0.17549
127	0.827167	0.920862	1.0247	0.0689749	0.0636843	0.178984
127.5	0.826583	0.920537	1.01467	0.0667948	0.0633025	0.171092
128	0.826513	0.921041	1.02231	0.0678909	0.0651319	0.168451
128.5	0.826106	0.92228	1.0119	0.0680158	0.0665843	0.183596
129	0.827091	0.921025	1.02375	0.0675799	0.0648913	0.117107
129.5	0.82684	0.922519	1.03407	0.0690572	0.0634343	0.115809
130	0.828857	0.92173	1.05198	0.0688815	0.0641256	0.118828
130.5	0.829416	0.922491	1.04558	0.0704408	0.0643552	0.130905
131	0.830031	0.922329	1.04022	0.0681165	0.0646344	0.123797
131.5	0.831678	0.921545	1.03691	0.0702814	0.0617815	0.125219
132	0.831767	0.921086	1.03798	0.068227	0.0627858	0.132998
132.5	0.830759	0.920591	1.03244	0.067325	0.06349	0.141959
133	0.831748	0.91912	1.03338	0.0676277	0.0617897	0.129978
133.5	0.832903	0.918917	1.02209	0.0671991	0.0627738	0.135286
134	0.833743	0.919767	1.02805	0.067848	0.0635408	0.139881
134.5	0.834695	0.921468	1.04119	0.0683128	0.0644879	0.121546
135	0.834944	0.921217	1.03106	0.0673728	0.0644138	0.139113
135.5	0.831961	0.920443	1.03161	0.0678216	0.0646741	0.141201
136	0.832418	0.921167	1.02341	0.067192	0.0659719	0.131255
136.5	0.833604	0.919872	1.03387	0.0682214	0.0670071	0.129823
137	0.836188	0.920777	1.03576	0.0688118	0.0662424	0.146898
137.5	0.837149	0.921506	1.03751	0.0694556	0.0650909	0.138654
138	0.836188	0.919723	1.03854	0.0688405	0.0632851	0.135911
138.5	0.837041	0.918046	1.04098	0.0689119	0.0632306	0.148735
139	0.838399	0.919781	1.04121	0.0683699	0.0647409	0.143997
139.5	0.83844	0.919164	1.01872	0.0671406	0.0624665	0.148479
140	0.840191	0.919153	1.01522	0.0671953	0.0633305	0.159982
140.5	0.840725	0.917667	1.04272	0.0665407	0.0624267	0.146337
141	0.84039	0.91772	1.029	0.0668297	0.0609108	0.151531
141.5	0.841046	0.918341	1.02493	0.0696863	0.0609455	0.139005
142	0.84173	0.917855	1.02561	0.0710203	0.0605626	0.1524
142.5	0.841121	0.918646	1.0226	0.0709751	0.0594004	0.141139
143	0.841356	0.91916	1.03604	0.0701966	0.0604726	0.143254
143.5	0.84233	0.919283	1.03074	0.0699728	0.0593931	0.141339
144	0.842261	0.92088	1.00698	0.0694527	0.0600853	0.142358
144.5	0.838766	0.921635	1.03301	0.0678204	0.0620927	0.144232
145	0.840112	0.921145	1.03417	0.0686279	0.0616144	0.137815
145.5	0.842656	0.920744	1.02908	0.0673971	0.0631903	0.132471
146	0.840657	0.922688	1.02689	0.0662471	0.064693	0.141492
146.5	0.841651	0.923496	1.03527	0.0669332	0.0645553	0.134796
147	0.842642	0.922535	1.03861	0.0664582	0.0651298	0.142567
147.5	0.843044	0.922201	1.04181	0.0646731	0.064359	0.136026
148	0.843275	0.92319	1.04723	0.0653381	0.0633502	0.13352
148.5	0.84383	0.92373	1.04854	0.0658128	0.0626689	0.140574
149	0.846027	0.924346	1.04187	0.0677243	0.0629792	0.135404
149.5	0.847745	0.92354	1.03903	0.0671576	0.0628862	0.134053
150	0.847804	0.923322	1.03417	0.0674922	0.0635475	0.145558
150.5	0.849081	0.922225	1.03384	0.0694405	0.062935	0.139458
151	0.850581	0.921652	1.02751	0.0722597	0.0632241	0.143381
151.5	0.849431	0.921699	1.02085	0.0710741	0.0630731	0.146904
152	0.850443	0.920855	1.01834	0.0695717	0.0616822	0.16094
152.5	0.851396	0.921779	1.00623	0.0696938	0.0618539	0.173819
153	0.851508	0.921703	1.00843	0.0704113	0.0611146	0.167877
153.5	0.852549	0.921681	1.00954	0.0703326	0.0615167	0.164705
154	0.854636	0.921626	1.01261	0.0698095	0.0620126	0.153093
154.5	0.853094	0.921817	1.01734	0.0691522	0.064534	0.143527
155	0.853262	0.922085	1.02459	0.0691589	0.0654884	0.15233
155.5	0.855187	0.92229	1.03862	0.069181	0.0629927	0.147223
156	0.854539	0.921674	1.04323	0.0707425	0.0640411	0.171185
156.5	0.853733	0.920694	1.04535	0.0704284	0.0622749	0.170205
157	0.854266	0.921784	1.03653	0.0711645	0.0636457	0.16664
157.5	0.852417	0.922028	1.04447	0.0711915	0.0634844	0.156753
158	0.851849	0.92166	1.0426	0.0721521	0.0650423	0.155621
158.5		0.922138	1.05273		0.0653901	0.152097
159		0.921405	1.0544		0.0652074	0.14981
159.5		0.921333	1.04688		0.0646296	0.154189
160		0.92182	1.0256		0.064588	0.139281
160.5		0.922266	1.02377		0.0651629	0.141657
161		0.921072	1.03323		0.0634759	0.144915
161.5		0.92102	1.0286		0.0636148	0.148824
162		0.922279	1.03144		0.0634465	0.142208
162.5		0.92275	1.0364		0.0663033	0.147834
163		0.922222	1.03369		0.0657397	0.141911
163.5		0.922049	1.04451		0.0650656	0.137904
164		0.922078	1.04093		0.0653283	0.128296
164.5		0.923275	1.03428		0.0655005	0.129629
165		0.922107	1.03499		0.0650024	0.13165
165.5		0.921908	1.03324		0.0659396	0.12941
166		0.922754	1.03479		0.0647001	0.133378
166.5		0.920616	1.0371		0.0637887	0.128564
167		0.921989	1.04242		0.0639972	0.140262
167.5		0.922625	1.03467		0.0647191	0.134954
168		0.921426	1.03936		0.0642518	0.122816
168.5		0.92031	1.03497		0.0631439	0.130011
169		0.918851	1.03316		0.0636851	0.137765
169.5		0.919783	1.04197		0.0641651	0.127357
170		0.919321	1.04388		0.065018	0.135627
170.5		0.919223	1.03682		0.0647793	0.134067
171		0.920737	1.03393		0.0646644	0.125911
171.5			1.05573			0.0945907
172
172.5
173
173.5
174
174.5
175
