# Supplementary material for: Distinct states of nucleolar stress induced by anticancer drugs
Source: eLife journal article supplement (doi:10.7554/elife.88799), 2023-07-14
Supplement: fig6-data1 [file 6H.xlsx]

## Sheet: NPM1 flavo 
Time, sec	Avg droplets	Avg Nucleoplasm	Stdev droplets	Stdev Nucleoplasm
-1.5	0.998356	0.998608	0.0189192	0.00472087
-1	0.997998	1.00134	0.0129507	0.00261527
-0.5	1.00365	1.00005	0.0169477	0.0048015
0	0.0730668	0.114428	0.045346	0.046595
0.5	0.117558	0.187616	0.0690014	0.0597188
1	0.176965	0.256045	0.0848779	0.0677764
1.5	0.238183	0.315605	0.101759	0.0743059
2	0.290047	0.366528	0.110446	0.0784094
2.5	0.340815	0.41153	0.114851	0.078757
3	0.38677	0.452248	0.116653	0.0823155
3.5	0.430533	0.486734	0.116784	0.0822261
4	0.474156	0.518095	0.124611	0.0822278
4.5	0.506687	0.546813	0.129431	0.081225
5	0.532932	0.574883	0.122576	0.0818925
5.5	0.560927	0.598039	0.119291	0.0802498
6	0.588233	0.618364	0.126737	0.077648
6.5	0.610802	0.639939	0.126377	0.0788641
7	0.628558	0.66001	0.129726	0.0777104
7.5	0.652888	0.676058	0.129063	0.0776795
8	0.677649	0.691227	0.120327	0.0753301
8.5	0.687765	0.706402	0.122864	0.0750968
9	0.708406	0.721007	0.1333	0.0723969
9.5	0.723296	0.733733	0.138227	0.0709289
10	0.73435	0.746828	0.133925	0.0727592
10.5	0.753718	0.756174	0.132078	0.0669107
11	0.752339	0.766278	0.14102	0.0673357
11.5	0.774546	0.77678	0.127073	0.0659189
12	0.784766	0.787008	0.124317	0.0644593
12.5	0.796337	0.796972	0.125063	0.0630481
13	0.806305	0.802613	0.123333	0.0618855
13.5	0.820711	0.810255	0.129688	0.0616543
14	0.830478	0.817324	0.128153	0.0601522
14.5	0.852341	0.82348	0.129514	0.0607331
15	0.857672	0.832471	0.115528	0.0612735
15.5	0.863512	0.837036	0.124511	0.0590898
16	0.859847	0.846678	0.125595	0.0588574
16.5	0.869224	0.850656	0.120228	0.0571361
17	0.872592	0.856035	0.113572	0.057047
17.5	0.884335	0.858178	0.128506	0.0532703
18	0.887809	0.862704	0.129376	0.0517689
18.5	0.890652	0.867051	0.128732	0.0519033
19	0.891533	0.868854	0.128443	0.0491597
19.5	0.901723	0.872288	0.131774	0.049625
20	0.902945	0.875471	0.124474	0.046486
20.5	0.9046	0.880311	0.122472	0.04606
21	0.912813	0.884596	0.11253	0.0460958
21.5	0.914463	0.886435	0.110947	0.0441761
22	0.910118	0.889698	0.119606	0.0447477
22.5	0.917784	0.893525	0.113679	0.0459027
23	0.919595	0.895825	0.113997	0.0461357
23.5	0.929398	0.898021	0.108743	0.0434283
24	0.923614	0.902665	0.107988	0.0430446
24.5	0.935225	0.90623	0.110243	0.0442809
25	0.928104	0.908703	0.115083	0.0414289
25.5	0.933636	0.912044	0.117588	0.0385438
26	0.936011	0.912377	0.118977	0.0406047
26.5	0.94333	0.913491	0.119478	0.0413574
27	0.936846	0.914155	0.115845	0.0351565
27.5	0.934399	0.915654	0.109662	0.0378074
28	0.932042	0.919376	0.10135	0.0364459
28.5	0.933265	0.923341	0.105929	0.0373857
29	0.941088	0.924817	0.113338	0.0363848
29.5	0.948184	0.925534	0.105753	0.0355472
30	0.946829	0.928888	0.116401	0.0326874
30.5	0.953917	0.93016	0.128565	0.03376
31	0.968782	0.934509	0.135427	0.0372127
31.5	0.961113	0.934736	0.13131	0.0361565
32	0.962817	0.936541	0.133399	0.0347462
32.5	0.972522	0.937353	0.12877	0.0336078
33	0.979188	0.936788	0.119122	0.0342614
33.5	0.973263	0.943087	0.123699	0.0317751
34	0.973405	0.943332	0.118975	0.0327992
34.5	0.983309	0.942667	0.113369	0.0305385
35	0.985948	0.944235	0.0972882	0.0292166
35.5	0.990225	0.945321	0.101635	0.0295073
36	0.979523	0.945042	0.105282	0.0290153
36.5	0.979078	0.949399	0.100524	0.0312181
37	0.976812	0.949964	0.10564	0.028495
37.5	0.968178	0.947273	0.113946	0.0287985
38	0.982371	0.94452	0.109945	0.0313622
38.5	0.976978	0.9469	0.104417	0.031155
39	0.98244	0.94854	0.113143	0.025356
39.5	0.979015	0.951105	0.116951	0.0286107
40	0.98178	0.952456	0.122791	0.0288454
40.5	0.991815	0.949445	0.109623	0.0282106
41	0.978033	0.948021	0.12558	0.0293476
41.5	0.97953	0.949244	0.121342	0.0296916
42	0.984746	0.949085	0.130386	0.0286898
42.5	0.981329	0.949435	0.110776	0.0296546
43	0.988531	0.953704	0.120795	0.0296576
43.5	0.994096	0.95045	0.114995	0.0270953
44	0.993739	0.951951	0.122068	0.0258322
44.5	0.99691	0.956965	0.122978	0.027727
45	1.00048	0.959105	0.12594	0.0278955
45.5	1.0075	0.954087	0.119477	0.0274557
46	0.992382	0.954383	0.140109	0.0245243
46.5	0.992297	0.954878	0.142716	0.026044
47	0.986393	0.956608	0.164772	0.0268599
47.5	0.995646	0.958734	0.147463	0.0248486
48	1.00764	0.958372	0.126754	0.0206205
48.5	1.00685	0.958301	0.125724	0.0221223
49	1.00515	0.961406	0.137531	0.0282387
49.5	1.00194	0.959901	0.143422	0.0273851
50	1.00783	0.959836	0.148005	0.0232743
50.5	1.01162	0.959732	0.153547	0.0202839
51	1.01463	0.962779	0.150434	0.0240068
51.5	1.00991	0.963362	0.137445	0.0234262
52	1.0036	0.963529	0.132966	0.0222731
52.5	1.00784	0.963016	0.143104	0.0249657
53	1.0042	0.961576	0.132851	0.0227741
53.5	1.0018	0.963653	0.119016	0.0238588
54	1.00053	0.962474	0.120783	0.0247457
54.5	1.01432	0.962627	0.112846	0.0220299
55	1.01747	0.963401	0.113913	0.0234963
55.5	1.01525	0.965623	0.0919787	0.0212226
56	1.01978	0.964316	0.0992088	0.0199217
56.5	1.01667	0.965214	0.106881	0.0195397
57	1.02063	0.965216	0.111143	0.0198724
57.5	1.01195	0.965156	0.100896	0.0201034
58	1.00947	0.965312	0.115532	0.0210591
58.5	1.00505	0.961632	0.115706	0.0199602
59	0.998983	0.964611	0.118411	0.024523
59.5	1.0065	0.964119	0.119252	0.0209225
60	0.997798	0.96635	0.116604	0.0196303
60.5	1.00423	0.966143	0.0959705	0.0218318
61	0.998842	0.963831	0.104288	0.0200085
61.5	1.01082	0.963629	0.119993	0.0203025
62	0.999402	0.96632	0.122946	0.017722
62.5	0.993194	0.96694	0.122	0.0217338
63	1.0077	0.967715	0.117729	0.0184656
63.5	1.01668	0.966378	0.0995277	0.0181141
64	1.01489	0.967508	0.0926285	0.0184356
64.5	1.00528	0.968206	0.10412	0.0214449
65	1.00189	0.965571	0.114664	0.0219423
65.5	1.00268	0.966448	0.107051	0.0189751
66	0.988753	0.965393	0.113799	0.0212204
66.5	0.995731	0.968356	0.112108	0.0200908
67	0.997589	0.966808	0.107955	0.0195573
67.5	0.986169	0.968085	0.114111	0.0199415
68	0.997799	0.971007	0.117379	0.0194079
68.5	0.99411	0.968936	0.113522	0.018001
69	0.989719	0.970113	0.0994828	0.0205975
69.5	0.989142	0.971215	0.100812	0.0205183
70	0.983801	0.973641	0.106857	0.0229043
70.5	0.979925	0.971729	0.106785	0.0203588
71	0.991479	0.972693	0.10615	0.0220863
71.5	0.997557	0.968229	0.0905025	0.0238179
72	1.0004	0.970993	0.0902277	0.022015
72.5	0.998325	0.97096	0.089103	0.023205
73	1.00343	0.971684	0.0976475	0.0206991
73.5	1.00046	0.972838	0.107051	0.0255947
74	1.00552	0.970431	0.0778911	0.02486
74.5	1.01607	0.969696	0.0952403	0.0207813
75	1.01082	0.969696	0.106177	0.0219576
75.5	1.01032	0.972695	0.0950785	0.0221936
76	1.00032	0.971887	0.102668	0.0229529
76.5	1.01439	0.972732	0.0923303	0.0207321
77	1.0041	0.970828	0.091323	0.0189613
77.5	1.00534	0.971817	0.0858978	0.0198297
78	0.998689	0.972338	0.0864935	0.0222871
78.5	1.00208	0.973809	0.0901471	0.0216623
79	1.00033	0.970393	0.0977485	0.0187528
79.5	1.00802	0.969977	0.0810563	0.023664
80	1.01027	0.9704	0.0788325	0.0223774
80.5	1.01284	0.971649	0.0766395	0.0222117
81	0.99708	0.971372	0.0833786	0.0201541
81.5	1.01313	0.971642	0.0788064	0.024457
82	1.00737	0.97048	0.0813993	0.0254375
82.5	1.0148	0.968638	0.0847724	0.0280816
83	1.01972	0.970352	0.078547	0.0277676
83.5	1.0245	0.969262	0.0772019	0.025872
84	1.02513	0.968704	0.0779105	0.0262427
84.5	1.03405	0.968483	0.0815197	0.0248516
85	1.03536	0.972752	0.0980005	0.024986
85.5	1.03866	0.974941	0.0956385	0.0251146
86	1.04633	0.97256	0.121264	0.0236048
86.5	1.03556	0.972524	0.124885	0.0288708
87	1.03707	0.971333	0.130081	0.025876
87.5	1.03583	0.976216	0.127154	0.0245208
88	1.03397	0.971974	0.118935	0.0234485
88.5	1.02938	0.973995	0.137354	0.0213153
89	1.01319	0.972884	0.123547	0.0244099
89.5	1.01943	0.971954	0.130056	0.0213039
90	1.0416	0.972056	0.118764	0.0227434
90.5	1.04752	0.971039	0.12397	0.0217049
91	1.03247	0.972593	0.133111	0.0216915
91.5	1.04433	0.971274	0.131287	0.0231241
92	1.03678	0.972624	0.133591	0.0236093
92.5	1.02452	0.971048	0.129893	0.0194991
93	1.032	0.973916	0.132855	0.0254186
93.5	1.02543	0.975698	0.138508	0.0251263
94	1.03773	0.973909	0.139769	0.0272828
94.5	1.04244	0.972565	0.136844	0.0214557
95	1.03888	0.971336	0.134014	0.0224143
95.5	1.04319	0.969837	0.147226	0.0223604
96	1.04524	0.970423	0.141926	0.0203047
96.5	1.02786	0.97163	0.153342	0.0191639
97	1.02174	0.969762	0.164958	0.0202789
97.5	1.03091	0.971289	0.15259	0.0210257
98	1.01486	0.97013	0.167972	0.0187029
98.5	1.01103	0.96903	0.168788	0.0181012
99	1.00919	0.969092	0.161563	0.0227453
99.5	1.00825	0.973165	0.165026	0.0256018
100	0.998992	0.972771	0.161486	0.022113
100.5	1.00955	0.971092	0.17646	0.0206895
101	1.01093	0.970872	0.154962	0.0229137
101.5	1.00453	0.972233	0.153531	0.0203881
102	1.00398	0.9703	0.139909	0.0223197
102.5	1.02349	0.971605	0.156857	0.0263969
103	1.03203	0.972557	0.139026	0.0256107
103.5	1.04376	0.971311	0.152993	0.0244627
104	1.02533	0.972922	0.144917	0.0224087
104.5	1.02001	0.973913	0.158315	0.0223855
105	1.0273	0.974035	0.14061	0.0251078
105.5	1.02774	0.968427	0.13143	0.0279088
106	1.03538	0.973514	0.139484	0.0264616
106.5	1.03129	0.974086	0.137029	0.0266284
107	1.03841	0.977492	0.129334	0.0281223
107.5	1.03854	0.976407	0.137875	0.0230596
108	1.03828	0.971086	0.144158	0.0191941
108.5	1.0274	0.97233	0.144105	0.0193559
109	1.02436	0.975505	0.13845	0.0213146
109.5	1.01933	0.972596	0.135353	0.0244473
110	1.01711	0.970195	0.152829	0.0227634
110.5	1.02868	0.970828	0.167821	0.0254952
111	1.01819	0.971974	0.171757	0.0266736
111.5	1.0257	0.97576	0.171109	0.0277574
112	1.02459	0.97274	0.156287	0.0235292
112.5	1.01713	0.974524	0.168282	0.0248673
113	1.01568	0.973438	0.135668	0.0213442
113.5	1.01952	0.971792	0.145354	0.022275
114	1.01709	0.971902	0.142577	0.0232995
114.5	1.01018	0.972764	0.139322	0.0223136
115	1.01721	0.973119	0.122377	0.0252278
115.5	1.02714	0.973312	0.132303	0.0234809
116	1.01563	0.975568	0.141931	0.0208263
116.5	1.02183	0.976205	0.132899	0.0221305
117	1.02025	0.97381	0.133705	0.0245912
117.5	1.03385	0.971592	0.143194	0.0219983
118	1.02937	0.973116	0.141133	0.0252692
118.5	1.01635	0.971812	0.142661	0.0252926
119	1.02258	0.973567	0.142474	0.0276883
119.5	1.01538	0.971298	0.150648	0.0256388
120	1.02193	0.969948	0.149282	0.0270384
120.5	1.01593	0.972023	0.145272	0.0222377
121	1.02191	0.973397	0.151892	0.0212907
121.5	1.02721	0.975318	0.136837	0.0251968
122	1.03076	0.974422	0.143532	0.0224784
122.5	1.03656	0.974081	0.127279	0.0223183
123	1.03165	0.971464	0.124949	0.0209172
123.5	1.03071	0.971091	0.119728	0.0214525
124	1.03595	0.970961	0.132419	0.0222332
124.5	1.02848	0.972826	0.149392	0.0279907
125	1.02764	0.973906	0.136573	0.0278217
125.5	1.0199	0.97474	0.156796	0.0241754
126	1.02703	0.974484	0.163816	0.0257011
126.5	1.02815	0.974737	0.17549	0.0263465
127	1.0247	0.976834	0.178984	0.0280702
127.5	1.01467	0.9761	0.171092	0.0280084
128	1.02231	0.975216	0.168451	0.0250312
128.5	1.0119	0.977161	0.183596	0.0253581
129	1.02375	0.976579	0.117107	0.0258162
129.5	1.03407	0.973923	0.115809	0.0225744
130	1.05198	0.972788	0.118828	0.0257066
130.5	1.04558	0.971874	0.130905	0.0242421
131	1.04022	0.976929	0.123797	0.0239351
131.5	1.03691	0.977093	0.125219	0.0237075
132	1.03798	0.97542	0.132998	0.0221536
132.5	1.03244	0.974294	0.141959	0.0186696
133	1.03338	0.976771	0.129978	0.0220144
133.5	1.02209	0.976738	0.135286	0.0237306
134	1.02805	0.978364	0.139881	0.0226132
134.5	1.04119	0.976728	0.121546	0.0260649
135	1.03106	0.976676	0.139113	0.025369
135.5	1.03161	0.977265	0.141201	0.0204095
136	1.02341	0.977293	0.131255	0.0195076
136.5	1.03387	0.97626	0.129823	0.0229521
137	1.03576	0.976714	0.146898	0.0258023
137.5	1.03751	0.976201	0.138654	0.0254657
138	1.03854	0.977634	0.135911	0.0217614
138.5	1.04098	0.977445	0.148735	0.0224844
139	1.04121	0.975305	0.143997	0.0259779
139.5	1.01872	0.974785	0.148479	0.0257277
140	1.01522	0.977302	0.159982	0.0233103
140.5	1.04272	0.978371	0.146337	0.0272631
141	1.029	0.980594	0.151531	0.0272192
141.5	1.02493	0.977452	0.139005	0.0268145
142	1.02561	0.976323	0.1524	0.0256001
142.5	1.0226	0.97591	0.141139	0.0266478
143	1.03604	0.977323	0.143254	0.0254599
143.5	1.03074	0.974474	0.141339	0.0267551
144	1.00698	0.976201	0.142358	0.0245214
144.5	1.03301	0.974953	0.144232	0.0258018
145	1.03417	0.975674	0.137815	0.0275173
145.5	1.02908	0.977593	0.132471	0.0298436
146	1.02689	0.980025	0.141492	0.0337527
146.5	1.03527	0.979257	0.134796	0.0267126
147	1.03861	0.980388	0.142567	0.025957
147.5	1.04181	0.975711	0.136026	0.0278247
148	1.04723	0.975543	0.13352	0.0272614
148.5	1.04854	0.971348	0.140574	0.0293437
149	1.04187	0.977103	0.135404	0.0290087
149.5	1.03903	0.974472	0.134053	0.0299018
150	1.03417	0.975391	0.145558	0.0296687
150.5	1.03384	0.975796	0.139458	0.0289666
151	1.02751	0.976043	0.143381	0.0268755
151.5	1.02085	0.974056	0.146904	0.0304645
152	1.01834	0.976364	0.16094	0.0297908
152.5	1.00623	0.973304	0.173819	0.0296287
153	1.00843	0.9731	0.167877	0.0290612
153.5	1.00954	0.974728	0.164705	0.0314409
154	1.01261	0.97473	0.153093	0.0317049
154.5	1.01734	0.977349	0.143527	0.0320204
155	1.02459	0.976544	0.15233	0.0280661
155.5	1.03862	0.975898	0.147223	0.0294384
156	1.04323	0.974417	0.171185	0.0294796
156.5	1.04535	0.976098	0.170205	0.0292516
157	1.03653	0.97715	0.16664	0.0282932
157.5	1.04447	0.977028	0.156753	0.0284271
158	1.0426	0.976064	0.155621	0.0256323
	1.05273	0.975863	0.152097	0.025402
	1.0544	0.977923	0.14981	0.0265221
	1.04688	0.977211	0.154189	0.0220004
	1.0256	0.976568	0.139281	0.0245653
	1.02377	0.975151	0.141657	0.0239572
	1.03323	0.974815	0.144915	0.0239076
	1.0286	0.974465	0.148824	0.0228771
	1.03144	0.976839	0.142208	0.024349
	1.0364	0.978138	0.147834	0.0281156
	1.03369	0.977057	0.141911	0.026013
	1.04451	0.977138	0.137904	0.0283008
	1.04093	0.979792	0.128296	0.0275667
	1.03428	0.97708	0.129629	0.0259664
	1.03499	0.974306	0.13165	0.0237306
	1.03324	0.978744	0.12941	0.0254343
	1.03479	0.977084	0.133378	0.0271095
	1.0371	0.976621	0.128564	0.028509
	1.04242	0.977315	0.140262	0.0295438
	1.03467	0.975427	0.134954	0.0238946
	1.03936	0.975131	0.122816	0.0293046
	1.03497	0.973565	0.130011	0.0278125
	1.03316	0.974434	0.137765	0.0273861
	1.04197	0.974747	0.127357	0.0268626
	1.04388	0.975383	0.135627	0.0289834
	1.03682	0.977438	0.134067	0.026745
	1.03393	0.977895	0.125911	0.0283224
	1.05573	0.978263	0.0945907	0.026902
